# Supplementary material for: Stereoselective synthesis of C-sulfonylated aziridines from halomethyl phenyl sulfone and N-tert-butanesulfinyl imines
Source: Royal Society of Chemistry journal article supplement (doi:10.1039/c3ra44174a), 2013-11-06

## Supporting Information

---

### **Stereoselective synthesis of C-sulfonylated aziridines from halomethyl phenyl sulfone and N-tert-butanefulfinyl imines**

Ya Li,\* Haiji Huang, Zhen Wang, Fan Yang, Desheng Li, Bo Qin, Xinfeng Ren\*

Department of Chemistry and Chemical Engineering, Shanghai University of Engineering Science, 333 Longteng Road, Songjiang City, Shanghai, China.

Fax: +86-21-67791214.

E-mail: ya.li@sues.edu.cn, renxf@sues.edu.cn.

## Table of contents

|                                                                           |        |
|---------------------------------------------------------------------------|--------|
| General .....                                                             | S3     |
| Preparation and physical data of compounds <b>4</b> and <b>5</b> .....    | S4     |
| Preparation and physical data of compounds <b>6</b> .....                 | S10    |
| Preparation and physical data of compounds <b>7</b> .....                 | S11    |
| Preparation and physical data of compounds <b>8</b> .....                 | S12    |
| Determination of the configuration of <b>4a</b> by X-ray analysis.....    | S13    |
| Determination of the configuration of <b>6</b> by X-ray analysis.....     | S14    |
| Example for determination of diastereomer ratio of <b>4</b> by LC-MS..... | S15-17 |
| NMR spectra for all products.....                                         | S18-57 |

## General:

Unless otherwise mentioned, solvents and reagent were purchased from commercial sources and used as received. THF was freshly distilled over sodium. Chloromethyl phenyl sulfone and bromomethyl phenyl sulfone were prepared using known procedures.  $^1\text{H}$  NMR spectra were recorded on 400 MHz spectrometers with  $\text{Me}_4\text{Si}$  as internal standard.  $^{13}\text{C}$  NMR spectra were recorded on 100 MHz spectrometers. High-resolution mass data were recorded on a high-resolution mass spectrometer in the ESI mode.

### Typical procedure for the Synthesis of 2-Sulfonylated Aziridine **4a** from Bromomethyl Phenyl Sulfone and (R)-N-tert-Butanesulfinyl imine **2a**:

NaHMDS (1.2 equiv, 1.2 mmol, 1.0 mol/L in THF) was added to a mixture of the imine **2a** (1.0 mmol) and bromomethyl phenyl sulfone (1.2 equiv, 1.2 mmol) in THF (3.0 mL) at  $-70\text{ }^{\circ}\text{C}$ . Reaction mixture was stirred over 0.5 h. Then half saturated  $\text{NH}_4\text{Cl-H}_2\text{O}$  (10 mL) was added at  $-70\text{ }^{\circ}\text{C}$  and the quenched reaction mixture was extracted three times with ethyl acetate. The combined organic layers were dried over anhydrous  $\text{MgSO}_4$ . Evaporation of the solvent afforded the crude product, which was subject to flash chromatography to give pure aziridine **4a** (302 mg, 83 %).

#### (*Rs,2S,3R*)-1-(tert-butylsulfinyl)-2-phenyl-3-(phenylsulfonyl)aziridine (**4a**)

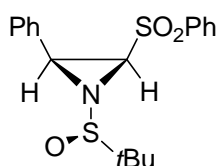

White solid, mp  $122.7\text{--}128.6\text{ }^{\circ}\text{C}$ ;  $[\alpha]_{\text{D}}^{25} - 7.0$  ( $c = 1.06$ ,  $\text{CHCl}_3$ ); IR (film)  $1448, 1333, 1157, 1081, 741, 690\text{ cm}^{-1}$ ;  $^1\text{H NMR}$  ( $\text{CDCl}_3$ )  $\delta$   $7.64\text{--}7.56$  (m, 1H),  $7.54\text{--}7.49$  (m, 2H),  $7.46\text{--}7.38$  (m, 4H),  $7.37\text{--}7.30$  (m, 3H),  $4.00$  (d,  $J = 6.5\text{ Hz}$ , 1H),  $3.64$  (d,  $J = 6.5\text{ Hz}$ , 1H),  $1.26$  (s, 9H);  $^{13}\text{C NMR}$  ( $\text{CDCl}_3$ )  $\delta$   $138.4, 134.0, 129.4, 129.0, 128.9, 128.6, 128.2, 128.1, 57.8, 54.5, 38.4, 22.4$ ; ESI ( $m/z$ )  $364.1$  ( $\text{M}^+ + 1$ ),  $386.1$  ( $\text{M}^+ + 23$ ); HRMS (ESI) calcd. For  $\text{C}_{18}\text{H}_{21}\text{NO}_3\text{S}_2\text{Na}$  ( $\text{M}^+ + \text{Na}$ ):  $386.0855$ , Found  $386.0855$ .

#### (*Rs,2S,3R*)-1-(tert-butylsulfinyl)-2-(4-chlorophenyl)-3-(phenylsulfonyl)aziridine (**4b**)

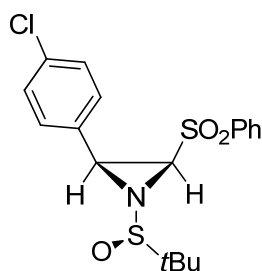

Sticky oil;  $[\alpha]_{\text{D}}^{25} + 9.7$  ( $c = 0.73$ ,  $\text{CHCl}_3$ ); IR (film)  $1143, 1059, 1013, 880, 839, 737\text{ cm}^{-1}$ ;  $^1\text{H NMR}$  ( $\text{CDCl}_3$ )  $\delta$   $7.63$  (dd,  $J = 11.7, 4.3\text{ Hz}$ , 1H),  $7.61\text{--}7.55$  (m, 2H),  $7.47$  (t,  $J = 7.8\text{ Hz}$ , 2H),  $7.38$  (d,  $J = 8.5\text{ Hz}$ , 2H),  $7.34\text{--}7.29$  (m, 2H),  $3.95$  (d,  $J = 6.5\text{ Hz}$ , 1H),  $3.62$  (d,  $J = 6.5\text{ Hz}$ , 1H),  $1.24$  (s, 9H);  $^{13}\text{C NMR}$  ( $\text{CDCl}_3$ )  $\delta$   $138.4, 134.7, 134.1, 130.3, 129.1, 128.9, 128.3, 128.1, 57.8, 54.5, 37.9, 22.4$ ; ESI ( $m/z$ )  $398.1$  ( $\text{M}^+ + 1$ ),  $420.1$  ( $\text{M}^+ + 23$ ); HRMS (ESI) calcd. For  $\text{C}_{18}\text{H}_{20}\text{ClNO}_3\text{S}_2\text{Na}$  ( $\text{M}^+ + \text{Na}$ ):  $420.0465$ , Found  $420.0467$ .

*(R<sub>s</sub>,2S,3R)*-1-(*tert*-butylsulfinyl)-2-(3,4-dichlorophenyl)-3-(phenylsulfonyl)aziridine (**4c**)

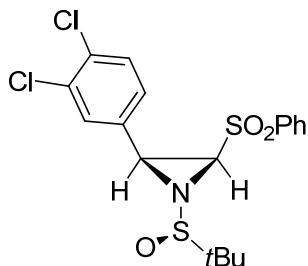

White solid, mp.50.2-52.2 °C;  $[\alpha]^{25} - 35.9$  ( $c = 1.11$ ,  $\text{CHCl}_3$ ); IR (film) 1474, 1334, 1155, 1083, 874, 729  $\text{cm}^{-1}$ ;  $^1\text{H}$  NMR ( $\text{CDCl}_3$ )  $\delta$  7.69 – 7.58 (m, 3H), 7.49 (t,  $J = 7.8$  Hz, 2H), 7.45 – 7.41 (m, 2H), 7.33 (dd,  $J = 8.4, 1.9$  Hz, 1H), 3.92 (d,  $J = 6.5$  Hz, 1H), 3.62 (d,  $J = 6.5$  Hz, 1H), 1.24 (s, 9H);  $^{13}\text{C}$  NMR ( $\text{CDCl}_3$ )  $\delta$  138.2, 134.3, 133.0, 132.4, 130.9, 130.1, 130.0, 129.2, 128.23, 128.20; ESI ( $m/z$ ) 432.1 ( $\text{M}^+ + 1$ ), 454.1 ( $\text{M}^+ + 23$ ); HRMS (ESI) calcd. For  $\text{C}_{18}\text{H}_{19}\text{Cl}_2\text{NO}_3\text{S}_2\text{Na}$  ( $\text{M}^+ + \text{Na}$ ): 454.0076, Found 454.0075.

*(R<sub>s</sub>,2R,3S)*-1-(*tert*-butylsulfinyl)-2-(phenylsulfonyl)-3-(3-(trifluoromethyl)phenyl)aziridine (**4d**)

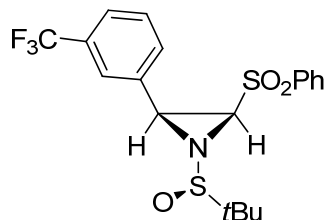

Oil;  $[\alpha]^{25} + 3.7$  ( $c = 0.97$ ,  $\text{CHCl}_3$ ); IR (film) 1471, 1069, 867, 809, 769, 746  $\text{cm}^{-1}$ ;  $^1\text{H}$  NMR ( $\text{CDCl}_3$ )  $\delta$  7.71 (d,  $J = 7.7$  Hz, 1H), 7.63 (t,  $J = 7.3$  Hz, 2H), 7.58 (s, 1H), 7.55 – 7.50 (m, 3H), 7.46 (q,  $J = 7.7$  Hz, 2H), 4.02 (d,  $J = 6.5$  Hz, 1H), 3.67 (d,  $J = 6.5$  Hz, 1H), 1.26 (s, 9H);  $^{13}\text{C}$  NMR ( $\text{CDCl}_3$ )  $\delta$  138.1, 134.2, 132.2, 130.6, 130.4 (q,  $J = 32.0$  Hz), 129.1, 128.6, 128.0, 125.6 (dd,  $J = 43.0, 3.8$  Hz), 125.1, 122.40, 57.8, 54.4, 37.7, 22.3; ESI ( $m/z$ ) 432.1 ( $\text{M}^+ + 1$ ), 454.1 ( $\text{M}^+ + 23$ ); HRMS (ESI) calcd. For  $\text{C}_{19}\text{H}_{20}\text{F}_3\text{NO}_3\text{S}_2\text{Na}$  ( $\text{M}^+ + \text{Na}$ ): 454.0729, Found 454.0730.

*(R<sub>s</sub>,2S,3R)*-1-(*tert*-butylsulfinyl)-2-(2-chlorophenyl)-3-(phenylsulfonyl)aziridine (**4e**)

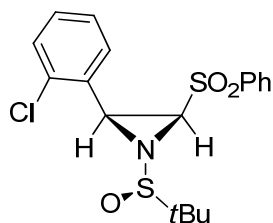

Sticky oil;  $[\alpha]^{25} - 251.1$  ( $c = 0.54$ ,  $\text{CHCl}_3$ ); IR (film) 1447, 1324, 1153, 1085, 925, 750  $\text{cm}^{-1}$ ;  $^1\text{H}$  NMR ( $\text{CDCl}_3$ )  $\delta$  8.05 – 7.99 (m, 2H), 7.72 (t,  $J = 7.5$  Hz, 1H), 7.62 (t,  $J = 7.7$  Hz, 2H), 7.41 (dd,  $J = 8.0, 0.9$  Hz, 1H), 7.32 (td,  $J = 7.8, 1.3$  Hz, 1H), 7.20 (td,  $J = 7.6, 0.9$  Hz, 1H), 7.08 (dd,  $J = 7.7, 1.2$  Hz, 1H), 4.54 (s, 1H), 4.22 (d,  $J = 3.8$  Hz, 1H), 1.14 (s, 9H);  $^{13}\text{C}$  NMR ( $\text{CDCl}_3$ )  $\delta$  137.4, 136.6, 134.5, 131.0, 130.1, 129.6,

129.5, 128.8, 128.0, 126.9, 57.4, 50.7, 44.5, 21.9; ESI (m/z) 398.1 ( $M^+ + 1$ ), 420.1 ( $M^+ + 23$ ); HRMS (ESI) calcd. For  $C_{18}H_{20}ClNO_3S_2Na$  ( $M^+ + Na$ ): 420.0465, Found 420.0468.

(*Rs,2R,3S*)-1-(*tert*-butylsulfinyl)-(4-bromophenyl)-3-(phenylsulfonyl)aziridine (**4f**)

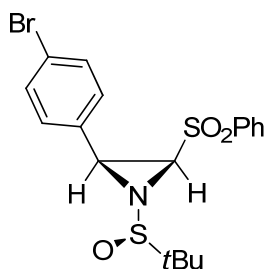

Sticky oil;  $[\alpha]^{25} + 13.8$  ( $c = 1.23$ ,  $CHCl_3$ ); IR (film) 1489, 1447, 1333, 1155, 1083, 728  $cm^{-1}$ ;  $^1H$  NMR ( $CDCl_3$ )  $\delta$  7.63 (t,  $J = 7.4$  Hz, 1H), 7.59 – 7.53 (m, 2H), 7.47 (dd,  $J = 7.9, 5.3$  Hz, 4H), 7.30 (d,  $J = 8.4$  Hz, 2H), 3.93 (d,  $J = 6.5$  Hz, 1H), 3.61 (d,  $J = 6.5$  Hz, 1H), 1.23 (s, 9H);  $^{13}C$  NMR ( $CDCl_3$ )  $\delta$  138.3, 134.1, 131.3, 130.5, 129.1, 128.6, 128.1, 122.8, 57.8, 54.4, 37.9, 22.4; ESI (m/z) 443 ( $M^+ + 1$ ); HRMS (ESI) calcd. For  $C_{18}H_{20}BrNO_3S_2Na$  ( $M^+ + Na$ ): 463.9960, Found 463.9979.

(*Rs,2R,3S*)-1-(*tert*-butylsulfinyl)-(4-methoxyphenyl)-3-(phenylsulfonyl)aziridine (**4g**)

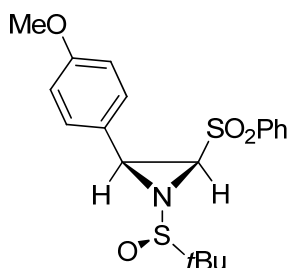

Sticky oil;  $[\alpha]^{25} + 1.2$  ( $c = 0.47$ ,  $CHCl_3$ ); IR (film) 1515, 1332, 1253, 1155, 1082, 824, 730  $cm^{-1}$ ;  $^1H$  NMR ( $CDCl_3$ )  $\delta$  7.64 – 7.58 (m, 1H), 7.55 (dd,  $J = 8.4, 1.2$  Hz, 2H), 7.44 (dd,  $J = 8.1, 7.5$  Hz, 2H), 7.34 (t,  $J = 5.8$  Hz, 2H), 6.90 – 6.84 (m, 2H), 3.94 (d,  $J = 6.4$  Hz, 1H), 3.83 (s, 3H), 3.58 (d,  $J = 6.4$  Hz, 1H), 1.25 (s, 9H);  $^{13}C$  NMR ( $CDCl_3$ )  $\delta$  159.9, 138.6, 133.9, 130.2, 129.0, 128.2, 121.3, 113.5, 57.7, 55.2, 54.5, 38.3, 22.4; ESI (m/z) 394.1 ( $M^+ + 1$ ), 416.1 ( $M^+ + 23$ ); HRMS (ESI) calcd. For  $C_{19}H_{23}NO_4S_2Na$  ( $M^+ + Na$ ): 416.0961, Found 416.0963.

(*Rs,2S,3R*)-1-(*tert*-butylsulfinyl)-2-(4-isopropylphenyl)-3-(phenylsulfonyl)aziridine (**4h**)

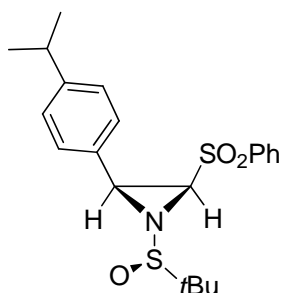

Sticky oil;  $[\alpha]^{25} - 6.1$  ( $c = 0.70$ ,  $\text{CHCl}_3$ ); IR (film) 1081, 1030, 964, 908, 783, 746  $\text{cm}^{-1}$ ;  $^1\text{H}$  NMR ( $\text{CDCl}_3$ )  $\delta$  7.61 – 7.55 (m, 1H), 7.50 – 7.45 (m, 2H), 7.42 – 7.36 (m, 2H), 7.29 (d,  $J = 8.2$  Hz, 2H), 7.16 (d,  $J = 8.2$  Hz, 2H), 3.96 (d,  $J = 6.5$  Hz, 1H), 3.63 (d,  $J = 6.5$  Hz, 1H), 2.92 (dt,  $J = 13.8, 6.9$  Hz, 1H), 1.28 (d,  $J = 1.2$  Hz, 3H), 1.26 (s, 12H);  $^{13}\text{C}$  NMR ( $\text{CDCl}_3$ )  $\delta$  149.3, 138.5, 133.8, 128.9, 128.8, 128.2, 126.6, 126.1, 57.7, 54.6, 38.4, 33.8, 23.98, 23.90, 22.5; ESI ( $m/z$ ) 406.2 ( $\text{M}^+ + 1$ ), 428.2 ( $\text{M}^+ + 23$ ); HRMS (ESI) calcd. For  $\text{C}_{21}\text{H}_{27}\text{NO}_3\text{S}_2\text{Na}$  ( $\text{M}^+ + \text{Na}$ ): 428.1325, Found 428.1331.

(*Rs,2R,3S*)-1-(*tert*-butylsulfinyl)-2-(phenylsulfonyl)-3-*m*-tolylaziridine (**4i**)

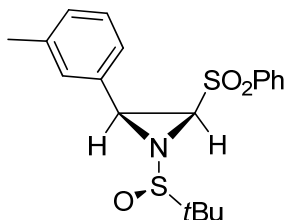

Oil;  $[\alpha]^{25} + 4.0$  ( $c = 0.85$ ,  $\text{CHCl}_3$ ); IR (film) 1333, 1156, 1076, 755, 728, 685  $\text{cm}^{-1}$ ;  $^1\text{H}$  NMR ( $\text{CDCl}_3$ )  $\delta$  7.63 – 7.56 (m, 1H), 7.51 (dd,  $J = 8.4, 1.2$  Hz, 2H), 7.41 (t,  $J = 7.8$  Hz, 2H), 7.25 – 7.20 (m, 2H), 7.16 – 7.09 (m, 2H), 3.96 (d,  $J = 6.6$  Hz, 1H), 3.63 (d,  $J = 6.6$  Hz, 1H), 2.32 (s, 3H), 1.26 (s, 9H);  $^{13}\text{C}$  NMR ( $\text{CDCl}_3$ )  $\delta$  138.3, 137.6, 133.8, 129.6, 129.3, 129.2, 128.9, 128.2, 127.9, 125.9, 57.7, 54.4, 38.3, 22.4, 21.3; ESI ( $m/z$ ) 378.1 ( $\text{M}^+ + 1$ ), 400.1 ( $\text{M}^+ + 23$ ); HRMS (ESI) calcd. For  $\text{C}_{19}\text{H}_{23}\text{NO}_3\text{S}_2\text{Na}$  ( $\text{M}^+ + \text{Na}$ ): 400.1012, Found 400.1009.

(*Rs,2S,3R*)-1-(*tert*-butylsulfinyl)-2-(naphthalen-1-yl)-3-(phenylsulfonyl)aziridine (**4j**)

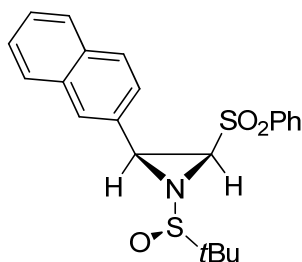

White solid, mp. 54.8-56.2  $^{\circ}\text{C}$ ;  $[\alpha]^{25} + 30.8$  ( $c = 0.66$ ,  $\text{CHCl}_3$ ); IR (film) 1456, 1108, 1058, 873, 810, 770  $\text{cm}^{-1}$ ;  $^1\text{H}$  NMR ( $\text{CDCl}_3$ )  $\delta$  7.88 – 7.74 (m, 4H), 7.58 – 7.45 (m, 6H), 7.32 (t,  $J = 7.8$  Hz, 2H), 4.16 (d,  $J = 6.5$  Hz, 1H), 3.72 (d,  $J = 6.5$  Hz, 1H), 1.28 (s, 9H);  $^{13}\text{C}$  NMR ( $\text{CDCl}_3$ )  $\delta$  138.4, 134.0, 133.3, 132.7, 128.9, 128.7, 128.2, 128.0, 127.7, 127.0, 126.5, 126.4, 126.0, 57.8, 54.7, 38.6, 22.5; ESI ( $m/z$ ) 414.2 ( $\text{M}^+ + 1$ ), 436.1 ( $\text{M}^+ + 23$ ); HRMS (ESI) calcd. For  $\text{C}_{22}\text{H}_{23}\text{NO}_3\text{S}_2\text{Na}$  ( $\text{M}^+ + \text{Na}$ ): 436.1012, Found 436.1002.

*(R<sub>s</sub>,2R,3S)*-1-(*tert*-butylsulfinyl)-2-(phenylsulfonyl)-3-styrylaziridine (**4k**)

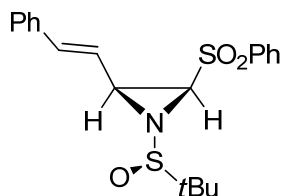

White solid, mp. 106.9-108.0 °C;  $[\alpha]^{25} + 43.7$  ( $c = 1.00$ ,  $\text{CHCl}_3$ ); IR (film) 1332, 1159, 1079, 966, 742, 686  $\text{cm}^{-1}$ ;  $^1\text{H}$  NMR ( $\text{CDCl}_3$ )  $\delta$  7.94 (d,  $J = 7.3$  Hz, 2H), 7.69 (t,  $J = 7.5$  Hz, 1H), 7.58 (t,  $J = 7.7$  Hz, 2H), 7.46 (d,  $J = 7.1$  Hz, 2H), 7.42 – 7.29 (m, 3H), 6.84 (d,  $J = 16.1$  Hz, 1H), 6.70 (dd,  $J = 16.0, 9.2$  Hz, 1H), 3.66 (dd,  $J = 9.2, 6.3$  Hz, 1H), 3.54 (d,  $J = 6.3$  Hz, 1H), 1.22 (s, 9H);  $^{13}\text{C}$  NMR ( $\text{CDCl}_3$ )  $\delta$  138.4, 135.7, 134.3, 129.3, 128.7, 128.6, 128.4, 126.8, 120.2, 57.8, 53.9, 40.1, 22.6; ESI ( $m/z$ ) 390.2 ( $\text{M}^+ + 1$ ), 412.1 ( $\text{M}^+ + 23$ ); HRMS (ESI) calcd. For  $\text{C}_{20}\text{H}_{23}\text{NO}_3\text{S}_2\text{Na}$  ( $\text{M}^+ + \text{Na}$ ): 412.1012, Found 412.1011.

*(R<sub>s</sub>,2S,3R)*-1-(*tert*-butylsulfinyl)-2-isopropyl-3-(phenylsulfonyl)aziridine (**4l**)

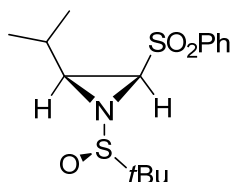

White solid, mp. 89.1-91.6 °C;  $[\alpha]^{25} - 110.5$  ( $c = 0.56$ ,  $\text{CHCl}_3$ ); IR (film) 1334, 1304, 1152, 1084, 854, 688  $\text{cm}^{-1}$ ;  $^1\text{H}$  NMR ( $\text{CDCl}_3$ )  $\delta$  7.97 – 7.90 (m, 2H), 7.68 (d,  $J = 7.5$  Hz, 1H), 7.59 (t,  $J = 7.6$  Hz, 2H), 3.29 (d,  $J = 6.6$  Hz, 1H), 2.83 (dd,  $J = 9.8, 6.6$  Hz, 1H), 2.57 (ddt,  $J = 13.5, 9.8, 6.7$  Hz, 1H), 1.21 (s, 9H), 1.20 (d,  $J = 6.7$  Hz, 3H), 1.14 (d,  $J = 6.7$  Hz, 3H);  $^{13}\text{C}$  NMR ( $\text{CDCl}_3$ )  $\delta$  139.0, 134.1, 129.2, 128.3, 57.0, 54.6, 47.7, 26.3, 22.3, 21.39, 21.37; ESI ( $m/z$ ) 330.1 ( $\text{M}^+ + 1$ ), 352.1 ( $\text{M}^+ + 23$ ); HRMS (ESI) calcd. For  $\text{C}_{15}\text{H}_{23}\text{NO}_3\text{S}_2\text{Na}$  ( $\text{M}^+ + \text{Na}$ ): 352.1012, Found 352.1004.

*(R<sub>s</sub>,2S,3R)*-1-(*tert*-butylsulfinyl)-2-isobutyl-3-(phenylsulfonyl)aziridine (**4m**)

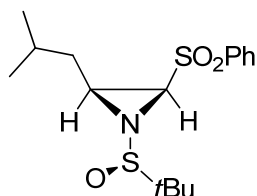

Oil;  $[\alpha]^{25} - 82.9$  ( $c = 0.49$ ,  $\text{CHCl}_3$ ); IR (film) 1366, 1020, 898, 837, 757;  $^1\text{H}$  NMR ( $\text{CDCl}_3$ )  $\delta$  7.96 – 7.88 (m, 2H), 7.69 (t,  $J = 7.4$  Hz, 1H), 7.58 (t,  $J = 7.7$  Hz, 2H), 3.25 (d,  $J = 6.4$  Hz, 1H), 3.10 (ddd,  $J = 10.2, 6.3, 4.1$  Hz, 1H), 2.24 (ddd,  $J = 13.9, 10.0, 6.0$  Hz, 1H), 1.94 (tt,  $J = 13.2, 6.4$  Hz, 1H), 1.70 (ddd,  $J = 13.7, 8.2, 4.1$  Hz, 1H), 1.20 (s, 9H), 1.04 (d,  $J = 6.6$  Hz, 6H);  $^{13}\text{C}$  NMR ( $\text{CDCl}_3$ )  $\delta$  138.9, 134.1, 129.2, 128.3, 57.0, 52.7, 38.9, 34.8, 27.2, 22.9, 22.3, 22.2; ESI ( $m/z$ ) 344.1 ( $\text{M}^+ + 1$ ), 366.2 ( $\text{M}^+ + 23$ ); HRMS (ESI) calcd. For  $\text{C}_{16}\text{H}_{25}\text{NO}_3\text{S}_2\text{Na}$  ( $\text{M}^+ + \text{Na}$ ): 366.1168, Found 366.1168.



*(R<sub>s</sub>,3R)*-1-(*tert*-butylsulfinyl)-2,2-diphenyl-3-(phenylsulfonyl)aziridine (**5a**)

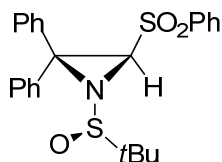

White solid, mp. 139.5 – 141.2 °C;  $[\alpha]^{25} - 54.7$  ( $c = 1.0$ ,  $\text{CHCl}_3$ ); IR (film) 1493, 1445, 1316, 1147, 1087, 756  $\text{cm}^{-1}$ ;  $^1\text{H}$  NMR ( $\text{CDCl}_3$ )  $\delta$  7.59 – 7.50 (m, 1H), 7.41 – 7.30 (m, 9H), 7.26 – 7.17 (m, 1H), 7.16 – 7.05 (m, 4H), 4.75 (s, 1H), 1.47 (s, 9H);  $^{13}\text{C}$  NMR ( $\text{CDCl}_3$ )  $\delta$  137.25, 135.4, 135.3, 133.7, 130.7, 129.2, 129.1, 128.7, 128.5, 128.3, 127.9, 127.7, 63.2, 58.1, 29.6, 22.4; ESI ( $m/z$ ) 440.1 ( $\text{M}^+ + 1$ ), 462.1 ( $\text{M}^+ + 23$ ); HRMS (ESI) calcd. For  $\text{C}_{24}\text{H}_{26}\text{NO}_3\text{S}_2\text{Na}$  ( $\text{M}^+ + \text{Na}$ ): 440.1349, Found 440.1345.

*(R<sub>s</sub>,3R)*-1-(*tert*-butylsulfinyl)-3-(phenylsulfonyl)-2,2-dip-tolylaziridine (**5b**)

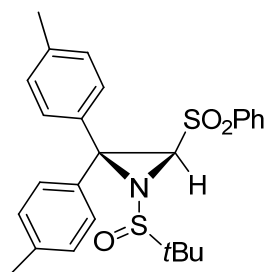

White solid, mp. 128.6 – 129.2 °C;  $[\alpha]^{25} + 155.9$  ( $c = 0.95$ ,  $\text{CHCl}_3$ ); IR (film) 1473, 1338, 1153, 1088, 810, 730  $\text{cm}^{-1}$ ;  $^1\text{H}$  NMR ( $\text{CDCl}_3$ )  $\delta$  7.55 (dd,  $J = 10.3, 4.3$  Hz, 1H), 7.41 – 7.35 (m, 2H), 7.32 (t,  $J = 7.8$  Hz, 2H), 7.22 (d,  $J = 8.2$  Hz, 2H), 7.13 (d,  $J = 8.0$  Hz, 2H), 7.00 (d,  $J = 7.2$  Hz, 2H), 6.90 (d,  $J = 8.2$  Hz, 2H), 4.72 (s, 1H), 2.32 (d,  $J = 4.2$  Hz, 6H), 1.45 (s, 9H);  $^{13}\text{C}$  NMR ( $\text{CDCl}_3$ )  $\delta$  139.2, 137.6, 137.3, 133.6, 132.6, 132.5, 130.5, 129.0, 128.9, 128.6, 128.5, 128.3, 63.4, 58.0, 22.4, 21.2, 21.1; ESI ( $m/z$ ) 490.1 ( $\text{M}^+ + 23$ ); HRMS (ESI) calcd. For  $\text{C}_{26}\text{H}_{29}\text{NNaO}_3\text{S}_2$  ( $\text{M}^+ + \text{Na}$ ): 490.1481, Found 490.1487.

*(R<sub>s</sub>,3R)*-1-(*tert*-butylsulfinyl)-2,2-bis(4-chlorophenyl)-3-(phenylsulfonyl)aziridine (**5c**)

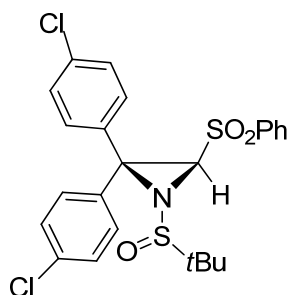

White solid, mp. 102.1 – 103.8 °C;  $[\alpha]^{25} + 96.0$  ( $c = 1.14$ ,  $\text{CHCl}_3$ ); IR (film) 2926, 1490, 1322, 1152, 1088, 814  $\text{cm}^{-1}$ ;  $^1\text{H}$  NMR ( $\text{CDCl}_3$ )  $\delta$  7.55 – 7.59 (m, 1H), 7.33 – 7.39 (m, 4H), 7.23 – 7.28 (m, 4H), 7.01 – 7.07 (m, 4H), 4.66 (s, 1H), 1.42 (s, 9H);  $^{13}\text{C}$  NMR ( $\text{CDCl}_3$ )  $\delta$  136.9, 135.7, 134.3, 134.0, 133.7, 133.3, 132.0, 130.3, 128.8, 128.7, 128.5, 128.0, 63.2, 58.3, 56.9, 22.3; ESI ( $m/z$ ) 530.0 ( $\text{M}^+ + 23$ ); HRMS (ESI) calcd. For  $\text{C}_{24}\text{H}_{23}\text{Cl}_2\text{NO}_3\text{S}_2\text{Na}$  ( $\text{M}^+ + \text{Na}$ ): 530.0389, Found 530.0385.

## Procedure for synthesis of chiral enamine **6**:

$\text{BF}_3 \cdot \text{OEt}_2$  (71 mg, 0.5 mmol) was added to a mixture of compound **4a** (182 mg, 0.5 mmol) and dichloromethane (2 mL) at 0 °C. The reaction mixture was stirred at 0 °C for 12 h and was then subject to flash chromatography to give the corresponding enamine **6** (110 mg, 61 %).

*(R<sub>s</sub>)-(E)-2-methyl-N-(2-phenyl-2-(phenylsulfonyl)vinyl)propane-2-sulfinamide (6)*

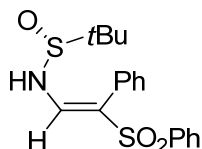

White solid, mp. 202.5 – 203.4;  $[\alpha]^{25} + 22.7$  (c = 0.54,  $\text{CHCl}_3$ ); IR (film) 1620, 1446, 1241, 1140, 1070, 690  $\text{cm}^{-1}$ ;  $^1\text{H}$  NMR ( $\text{CDCl}_3$ )  $\delta$  7.88 (d, J = 13.2 Hz, 1H), 7.68 – 7.61 (m, 2H), 7.54 (dd, J = 10.6, 4.3 Hz, 1H), 7.48 – 7.31 (m, 5H), 7.15 – 7.05 (m, 2H), 5.72 (d, J = 13.4 Hz, 1H), 1.17 (s, 9H);  $^{13}\text{C}$  NMR ( $\text{CDCl}_3$ )  $\delta$  140.1, 138.5, 132.7, 130.8, 129.5, 129.4, 128.7, 128.3, 127.7, 119.3, 57.8, 22.0; ESI (m/z) 364 ( $\text{M}^+ + 1$ ), 386 ( $\text{M}^+ + 23$ ); HRMS (ESI) calcd. For  $\text{C}_{18}\text{H}_{21}\text{NO}_3\text{S}_2\text{Na}$  ( $\text{M}^+ + \text{Na}$ ): 386.0855, Found 386.0864.

## Typical procedure for oxidation of compound 4a to N-sulfonylated product 7:

Compound **4a** (364 mg, 1 mmol) was dissolved in 5 mL dichloromethane, then 1.2 mmol MCPBA was added at 0 °C. The reaction mixture was stirred at 0 °C for 4 h and was then 2N Na<sub>2</sub>CO<sub>3</sub> (4 mL) was added. The reaction mixture was extracted three times with ethyl acetate (20 mL x 3). The combined organic layers were dried over anhydrous MgSO<sub>4</sub>. Evaporation of the solvent afforded the crude product, which was subject to flash chromatography to give the corresponding aziridine **7a** (330 mg, 87 %).

### (2*S*,3*R*)-1-(*tert*-butylsulfonyl)-2-phenyl-3-(phenylsulfonyl)aziridine (**7a**)

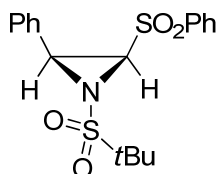

White solid, mp 136.8-138.1; [ $\alpha$ ]<sup>25</sup> + 47.7 (c = 0.66, CHCl<sub>3</sub>); IR (film) 1449, 1324, 1160, 1128, 765, 713 cm<sup>-1</sup>; <sup>1</sup>H NMR (CDCl<sub>3</sub>)  $\delta$  7.65 – 7.57 (m, 1H), 7.54 (dd, *J* = 8.4, 1.2 Hz, 2H), 7.42 (t, *J* = 7.9 Hz, 2H), 7.40 – 7.29 (m, 5H), 4.19 (d, *J* = 6.7 Hz, 1H), 4.10 (d, *J* = 6.7 Hz, 1H), 1.60 (s, 9H); <sup>13</sup>C NMR (CDCl<sub>3</sub>)  $\delta$  137.7, 134.2, 129.0, 128.8, 128.7, 128.5, 128.2, 128.1, 60.9, 57.8, 45.8, 24.0; ESI (m/z) 402.1 (M<sup>+</sup> + 23); HRMS (ESI) calcd. For C<sub>18</sub>H<sub>21</sub>NO<sub>4</sub>S<sub>2</sub>Na (M<sup>+</sup> + Na): 402.0804, Found 402.0802.

### (2*S*,3*R*)-1-(*tert*-butylsulfonyl)-2-(4-bromophenyl)-3-(phenylsulfonyl)aziridine (**7b**)

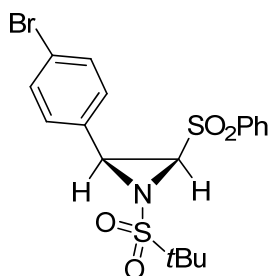

White solid, mp 156.5 - 157.2; [ $\alpha$ ]<sup>25</sup> + 30.3 (c = 1.11, CHCl<sub>3</sub>); IR (film) 1448, 1318, 1158, 1124, 893, 720 cm<sup>-1</sup>; <sup>1</sup>H NMR (CDCl<sub>3</sub>)  $\delta$  7.62 (d, *J* = 7.4 Hz, 1H), 7.61 – 7.53 (m, 2H), 7.46 (dd, *J* = 7.9, 6.0 Hz, 4H), 7.29 – 7.19 (m, 2H), 4.18 (d, *J* = 6.7 Hz, 1H), 4.03 (d, *J* = 6.7 Hz, 1H), 1.58 (s, 9H); <sup>13</sup>C NMR (CDCl<sub>3</sub>)  $\delta$  137.7, 134.4, 131.4, 129.7, 129.1, 128.4, 128.0, 123.1, 61.0, 57.8, 45.2, 24.0; ESI (m/z) 480.0 (M + Na<sup>+</sup>); HRMS (ESI) calcd. For C<sub>18</sub>H<sub>20</sub>BrNO<sub>4</sub>S<sub>2</sub>Na (M + Na<sup>+</sup>): 479.9909, Found 479.9903.

### Procedure for synthesis of Suzuki-coupling product **8**:

A mixture of **7b** (137 mg, 0.3 mmol), 4-methoxyphenylboronic acid (55 mg, 0.36 mmol), PdCl<sub>2</sub>(PPh<sub>3</sub>)<sub>2</sub> (10 mg, 0.015 mmol), Ag<sub>2</sub>O (21 mg, 0.09 mmol) and K<sub>2</sub>CO<sub>3</sub> (41 mg, 0.3 mmol) was stirred in THF at 65 °C under N<sub>2</sub> atmosphere for 8 h. The mixture was filtered and the filtrate was concentrated under reduced pressure. The residue was purified by flash column chromatography with ethyl acetate/petroleum ether (1 : 5) to afford **8** (91 mg, 63 %).

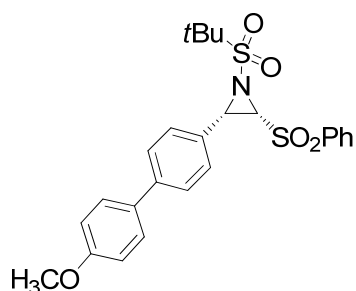

Sticky oil;  $[\alpha]^{25} + 26.9$  ( $c = 0.87$ , CHCl<sub>3</sub>); IR (film) 2920, 1448, 1303, 1140, 1070, 690 cm<sup>-1</sup>; <sup>1</sup>H NMR (CDCl<sub>3</sub>)  $\delta\delta$  7.51 – 7.63 (m, 7H), 7.40 (dd,  $J = 12.1, 8.3$  Hz, 4H), 6.99 (d,  $J = 8.7$  Hz, 2H), 4.21 (d,  $J = 6.7$  Hz, 1H), 4.12 (d,  $J = 6.7$  Hz, 1H), 3.86 (s, 3H), 1.61 (s, 9H); <sup>13</sup>C NMR (CDCl<sub>3</sub>)  $\delta$ 159.4, 141.3, 137.8, 134.2, 132.8, 129.0, 128.57, 128.50, 128.0, 127.0, 126.4, 114.2, 60.9, 57.8, 55.3, 45.8, 24.1; ESI ( $m/z$ ) 508.1 ( $M^+ + 23$ ); HRMS (ESI) calcd. For C<sub>25</sub>H<sub>27</sub>NO<sub>5</sub>S<sub>2</sub>Na ( $M^+ + Na$ ): 508.1223, Found 508.1208.

## Determination of the absolute configuration of **4a** (from ethyl acetate/hexane) by X-ray analysis

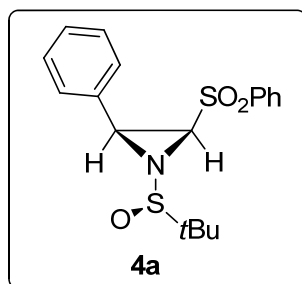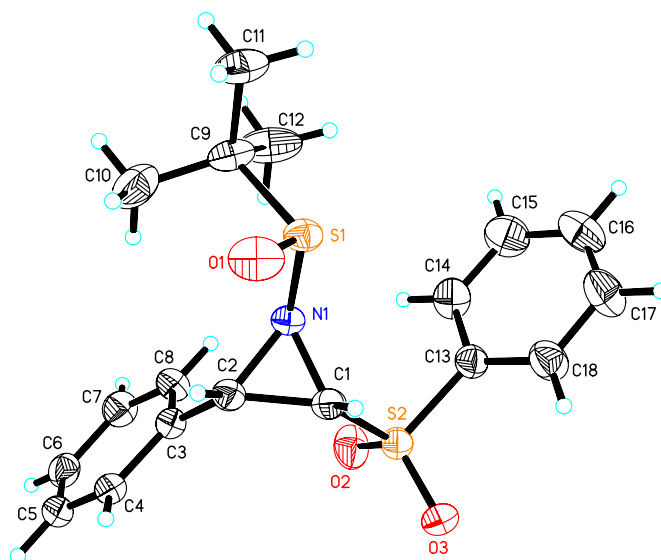

## Determination of the absolute configuration of **6** (from DCM/hexane) by X-ray analysis

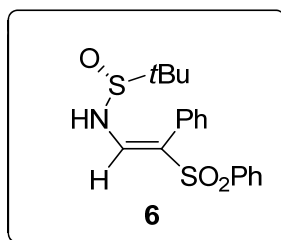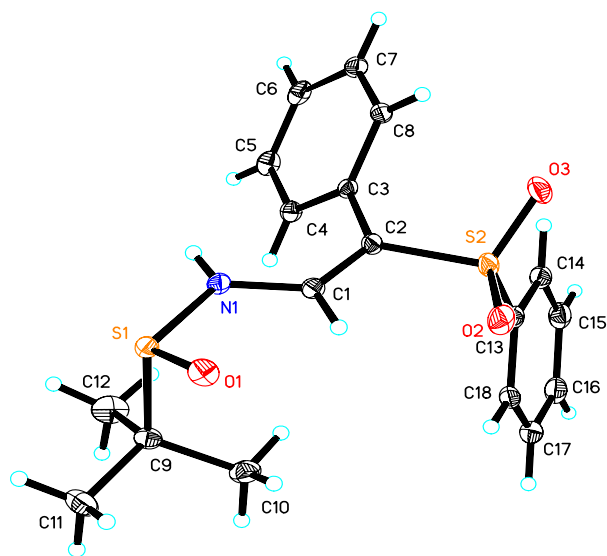

## Examples for determination of diastereomer ratio of **4a** by LC-MS.

LC-MS spectroscopy for the crude mixture of entry 2 (Table 1): chloromethyl phenyl sulfone, imine **2a** and LiHMDS in DMF

**4a**/other diastereomers = 7 : 1

**4a**,  $rt = 17.3$  min; the other diastereomer,  $rt = 18.6$  min

$dr = 23799 : 3371 = 7 : 1$

**1a)** HPLC  
spectroscopy

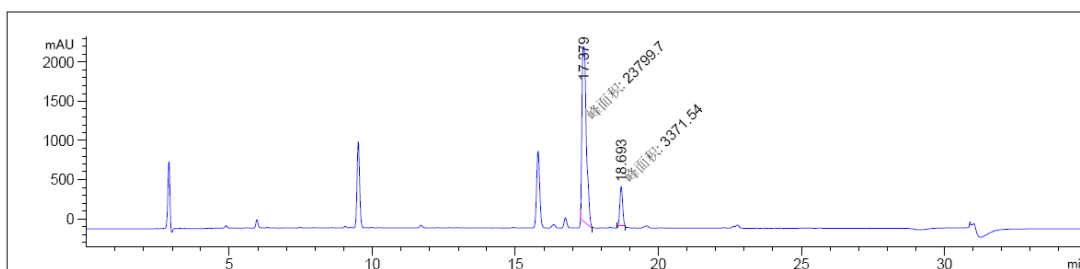

**1b)** Total ion  
current  
chromatogram

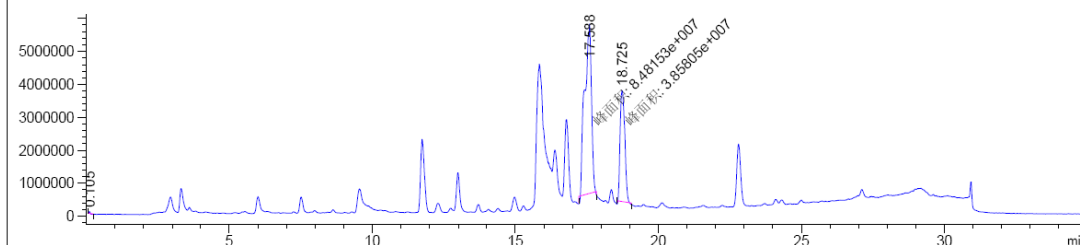

**1c)** Selected ion

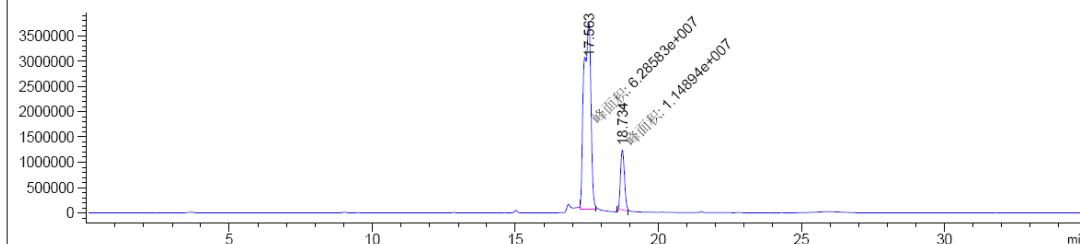

LC-MS spectroscopy for the crude mixture of entry 4 (Table 1): bromomethyl phenyl sulfone, imine 2a and LiHMDS in THF

**4a**,  $t_r = 16.1$  min;

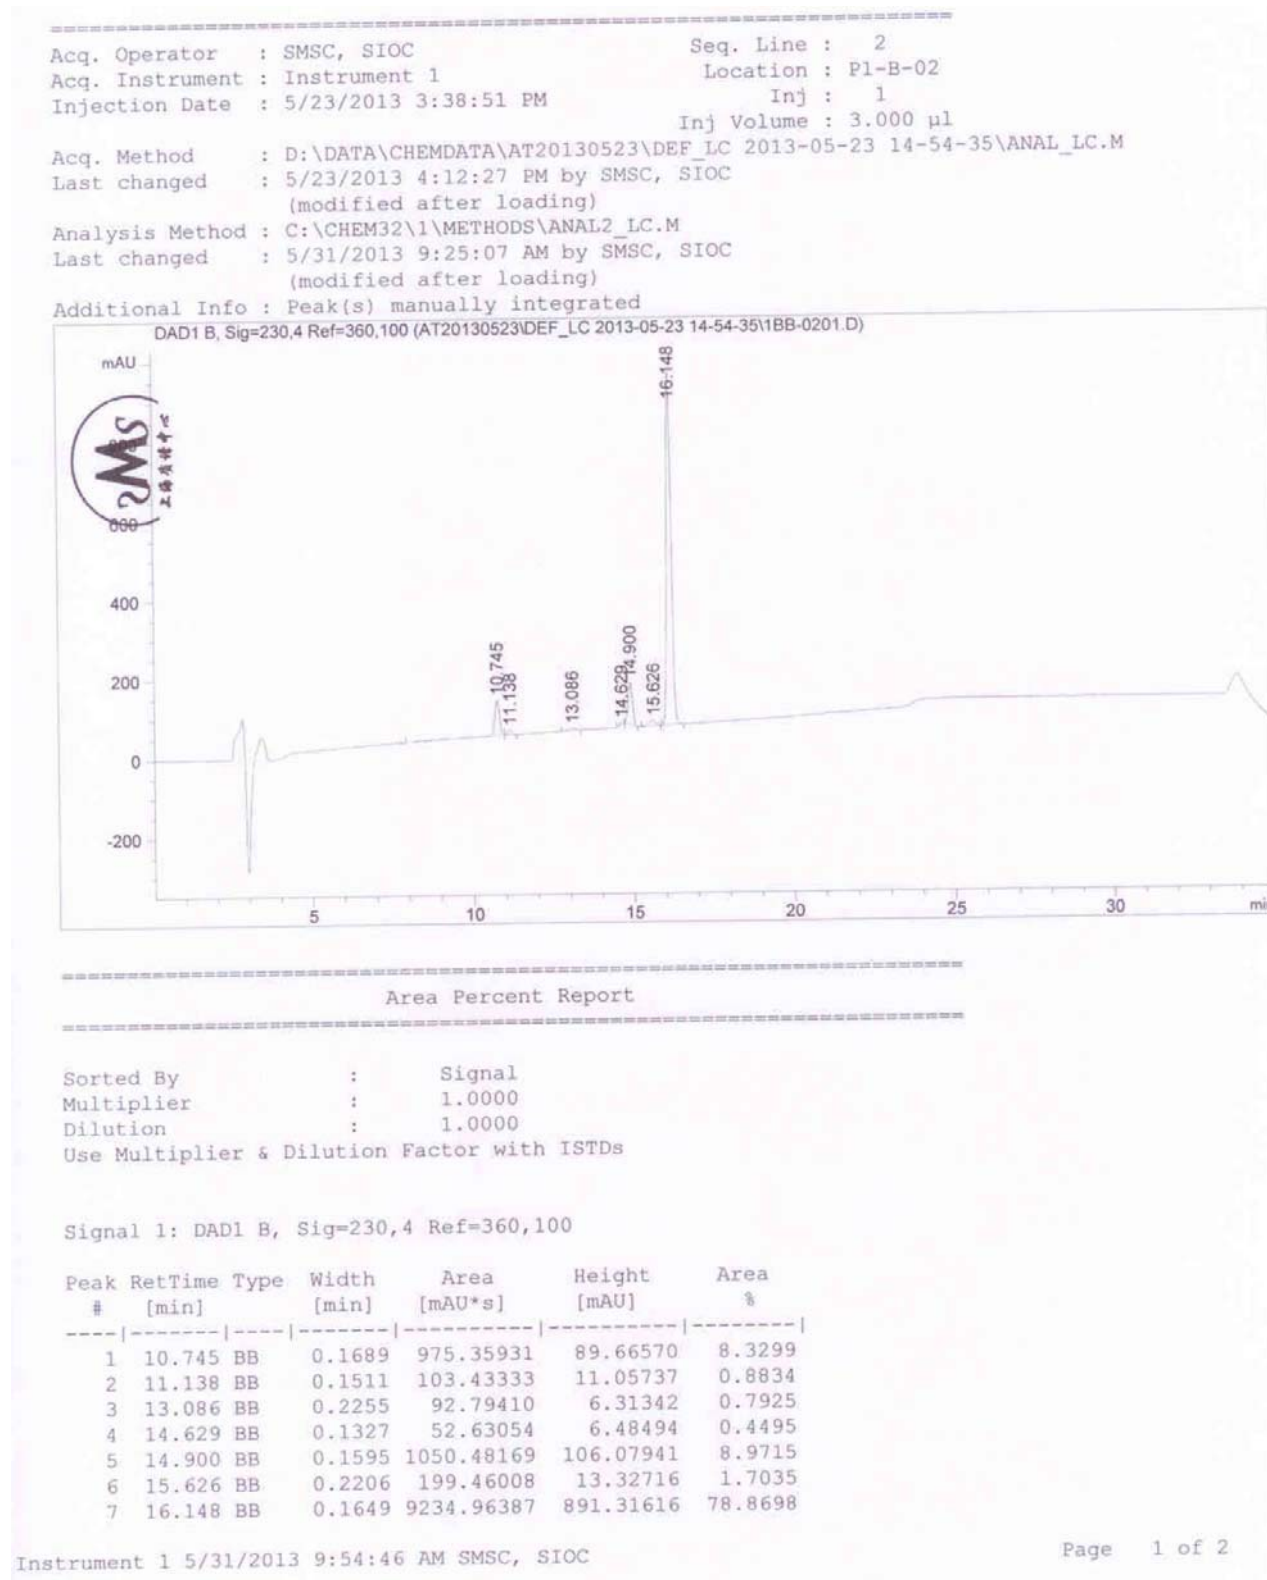



LC-MS spectroscopy for the crude mixture of entry 6 (Table 1): bromomethyl phenyl sulfone, imine 2a and NaHMDS in THF

**4a**,  $t_r = 16.2$  min;

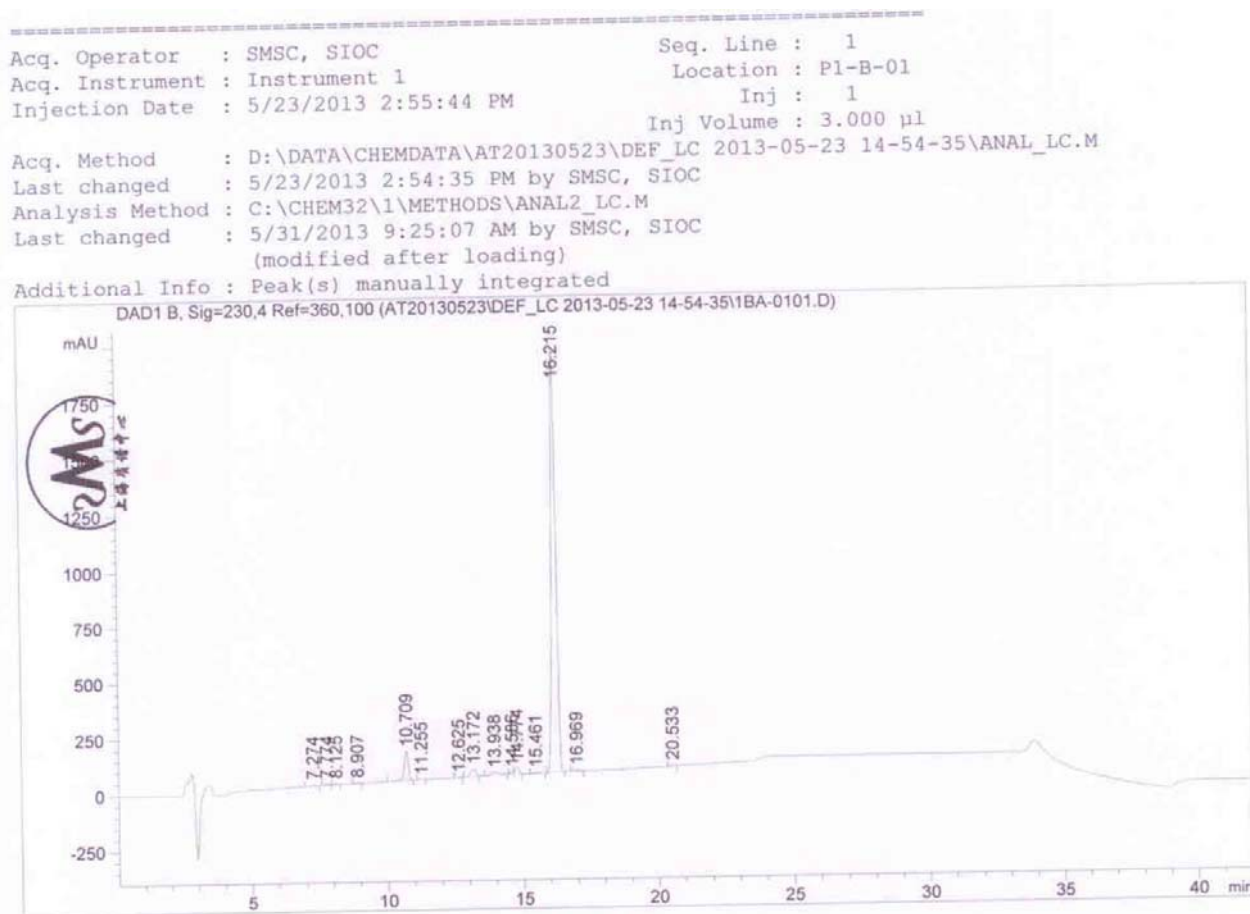

Area Percent Report

Sorted By : Signal  
Multiplier : 1.0000  
Dilution : 1.0000  
Use Multiplier & Dilution Factor with ISTDs

Signal 1: DAD1 B, Sig=230,4 Ref=360,100

| Peak # | RetTime [min] | Type | Width [min] | Area [mAU*s] | Height [mAU] | Area % |
|--------|---------------|------|-------------|--------------|--------------|--------|
| 1      | 7.274         | BB   | 0.1700      | 88.83517     | 8.09746      | 0.3469 |
| 2      | 7.774         | BB   | 0.1452      | 65.12118     | 7.22048      | 0.2543 |
| 3      | 8.125         | BB   | 0.1498      | 39.15896     | 4.23814      | 0.1529 |
| 4      | 8.907         | BB   | 0.1453      | 28.99157     | 3.21292      | 0.1132 |
| 5      | 10.709        | BB   | 0.1671      | 1387.73975   | 129.43439    | 5.4190 |
| 6      | 11.255        | BB   | 0.1599      | 12.46509     | 1.27695      | 0.0487 |
| 7      | 12.625        | BB   | 0.1453      | 24.93269     | 2.81647      | 0.0974 |
| 8      | 13.172        | BB   | 0.1954      | 418.02344    | 33.55160     | 1.6323 |

Instrument 1 5/31/2013 9:53:34 AM SMSC, SIOC

Page 1 of 2

## NMR Spectra for All New Compounds

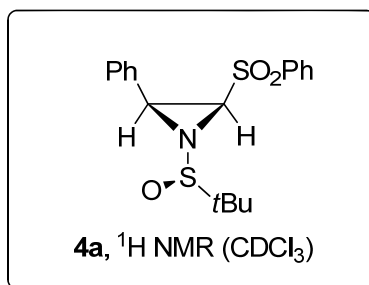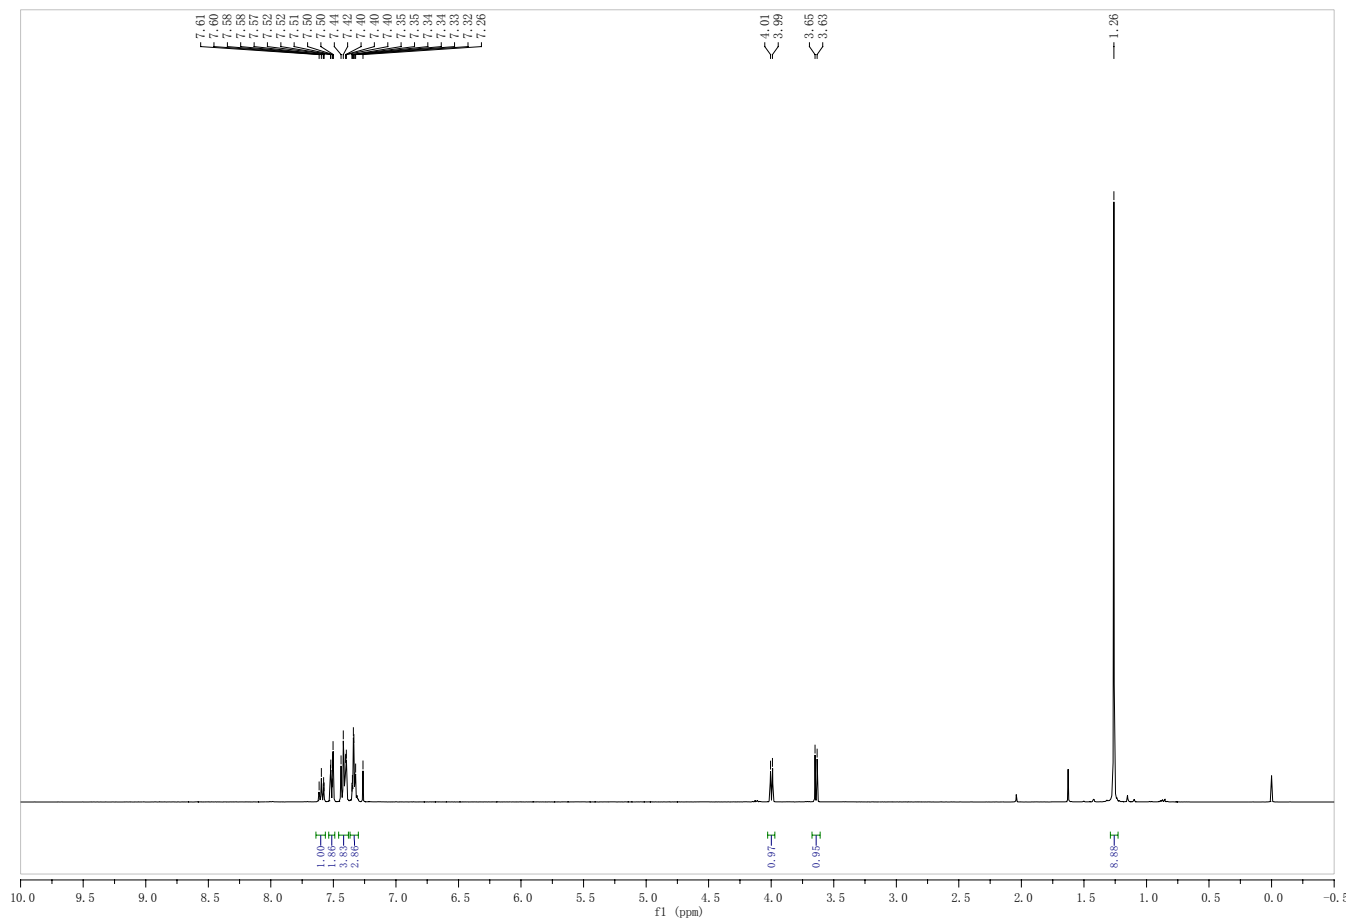

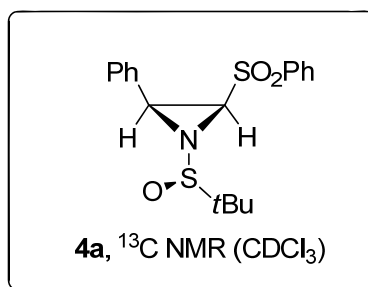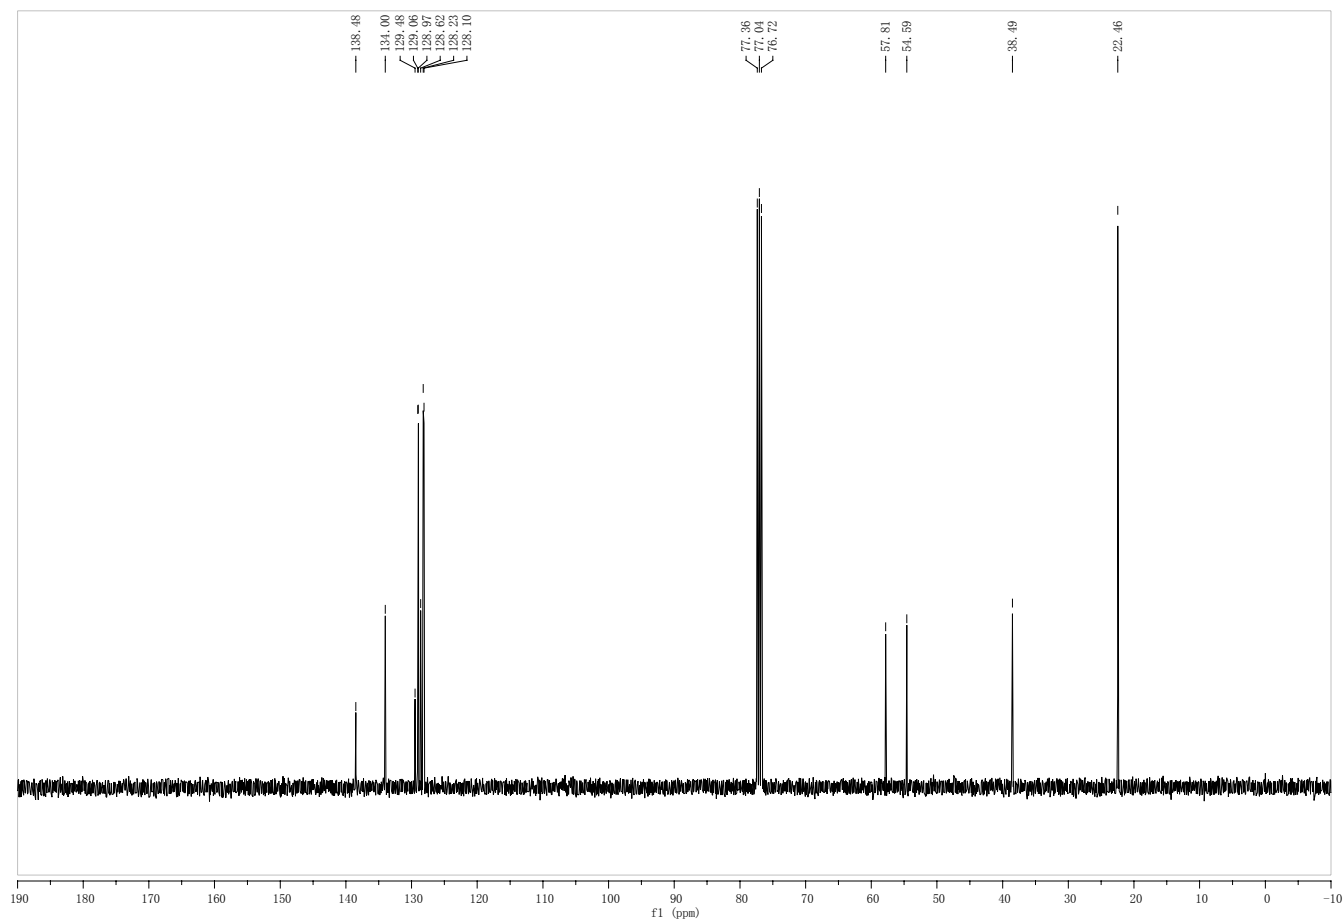

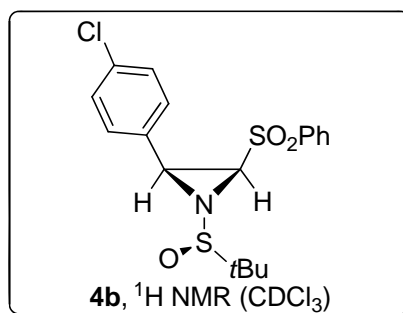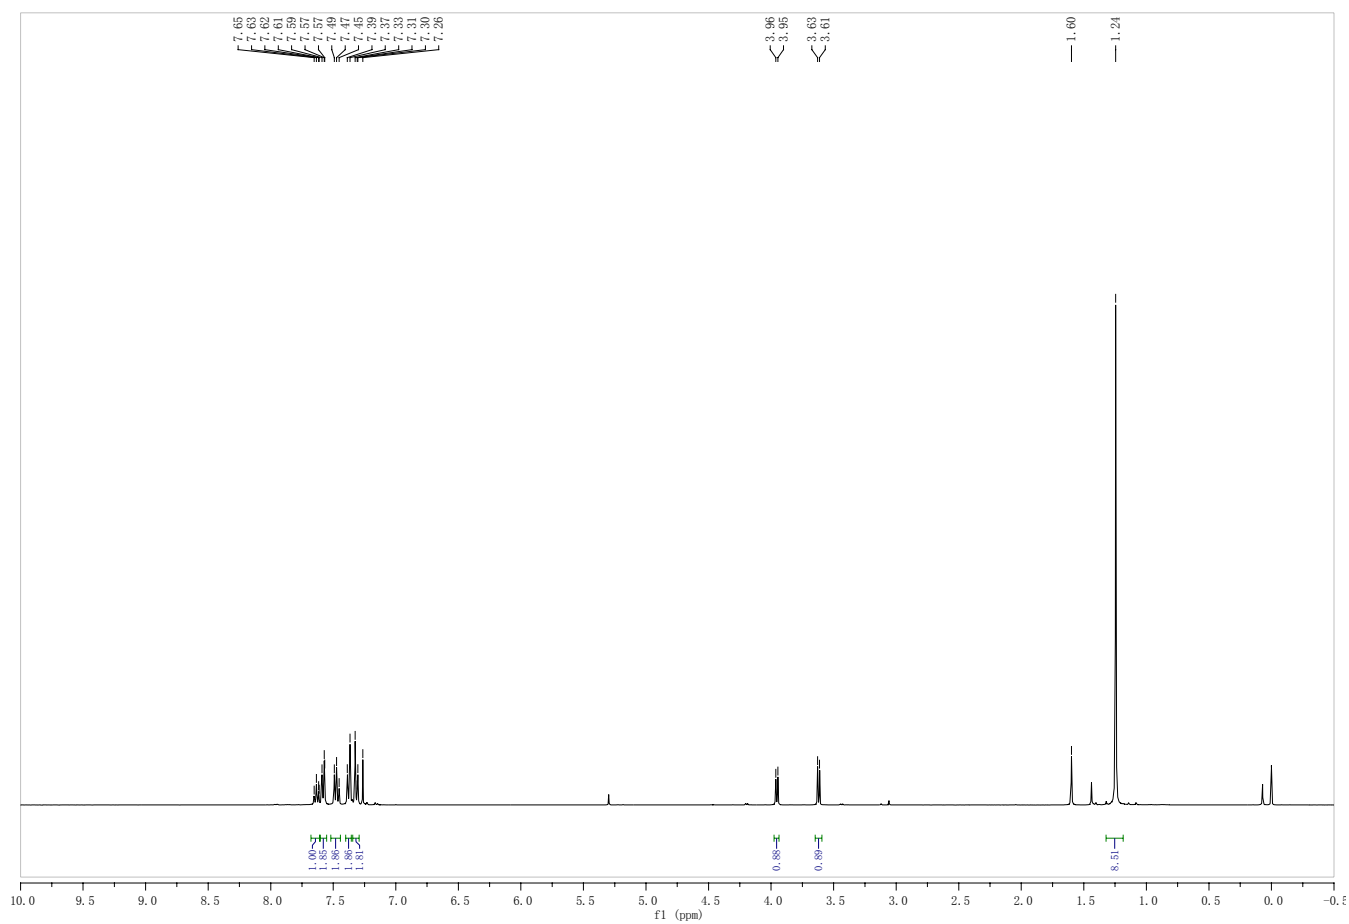

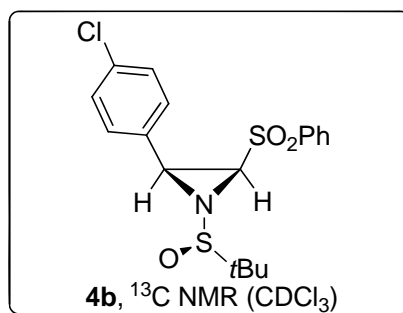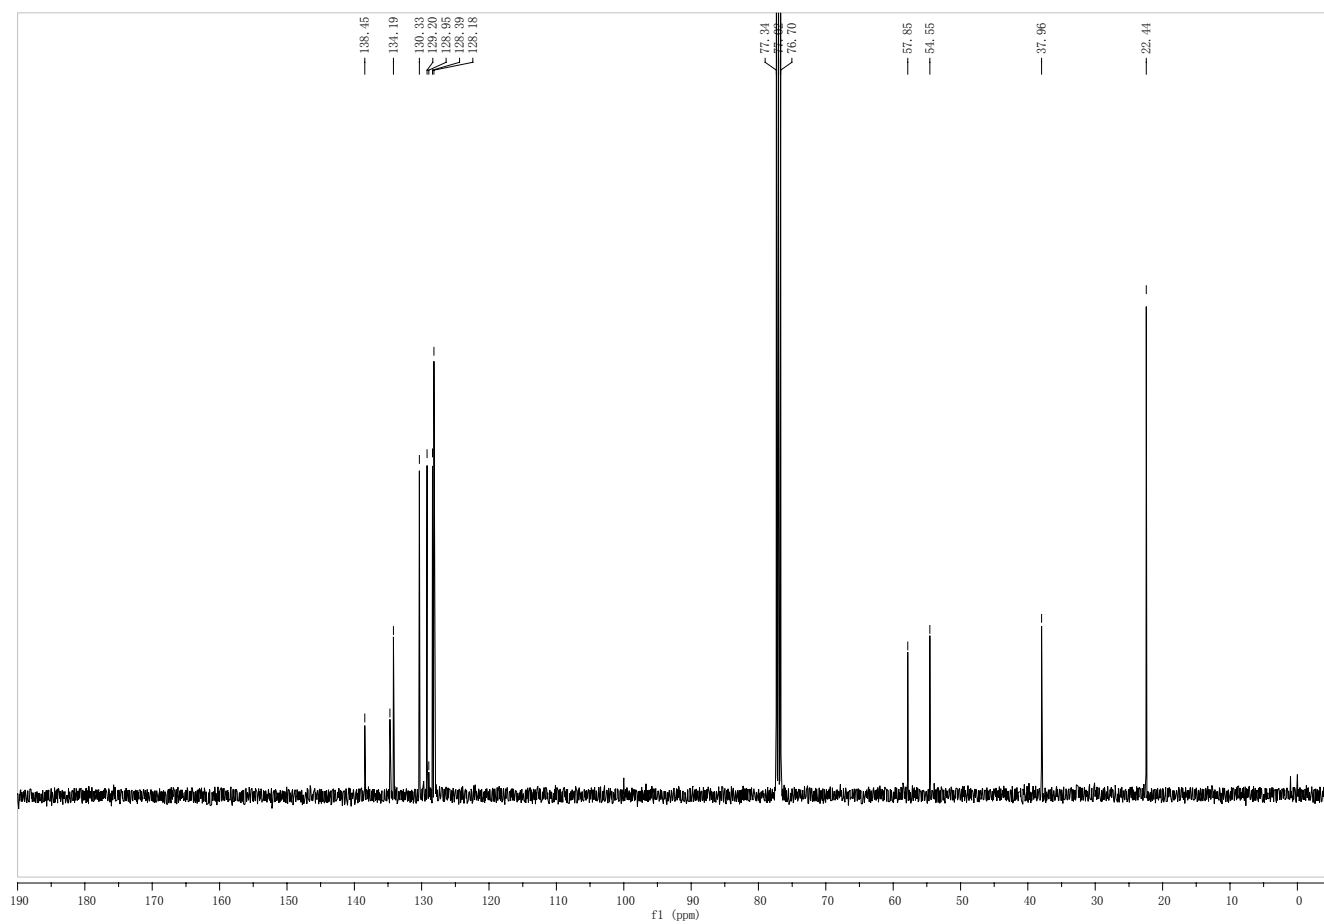

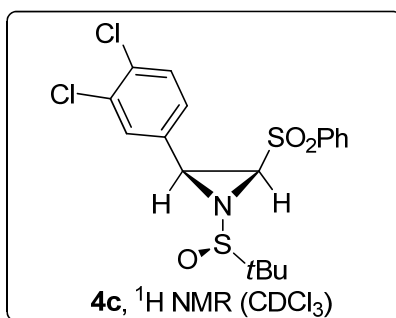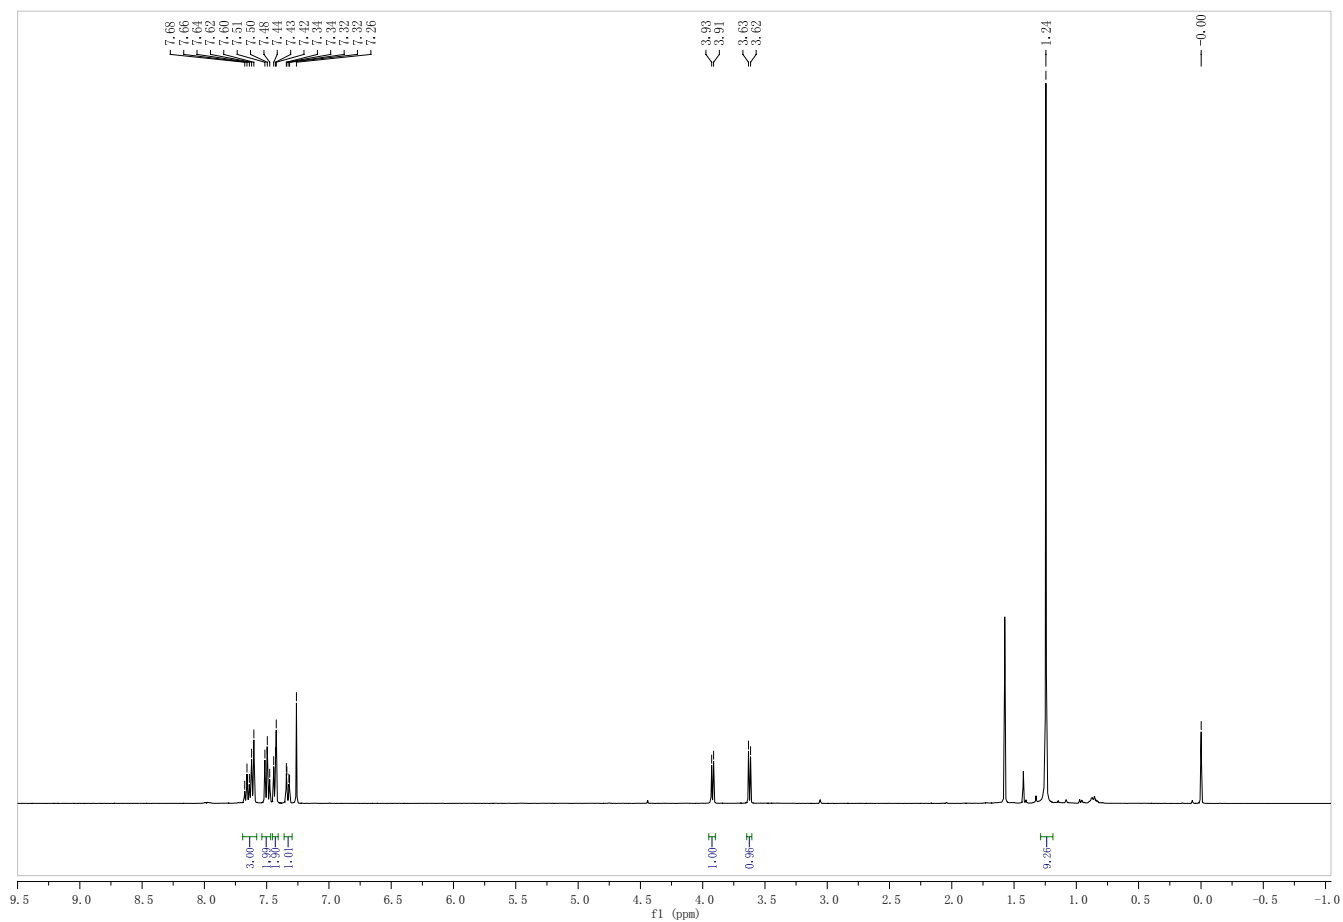

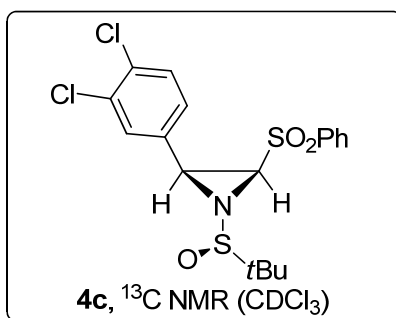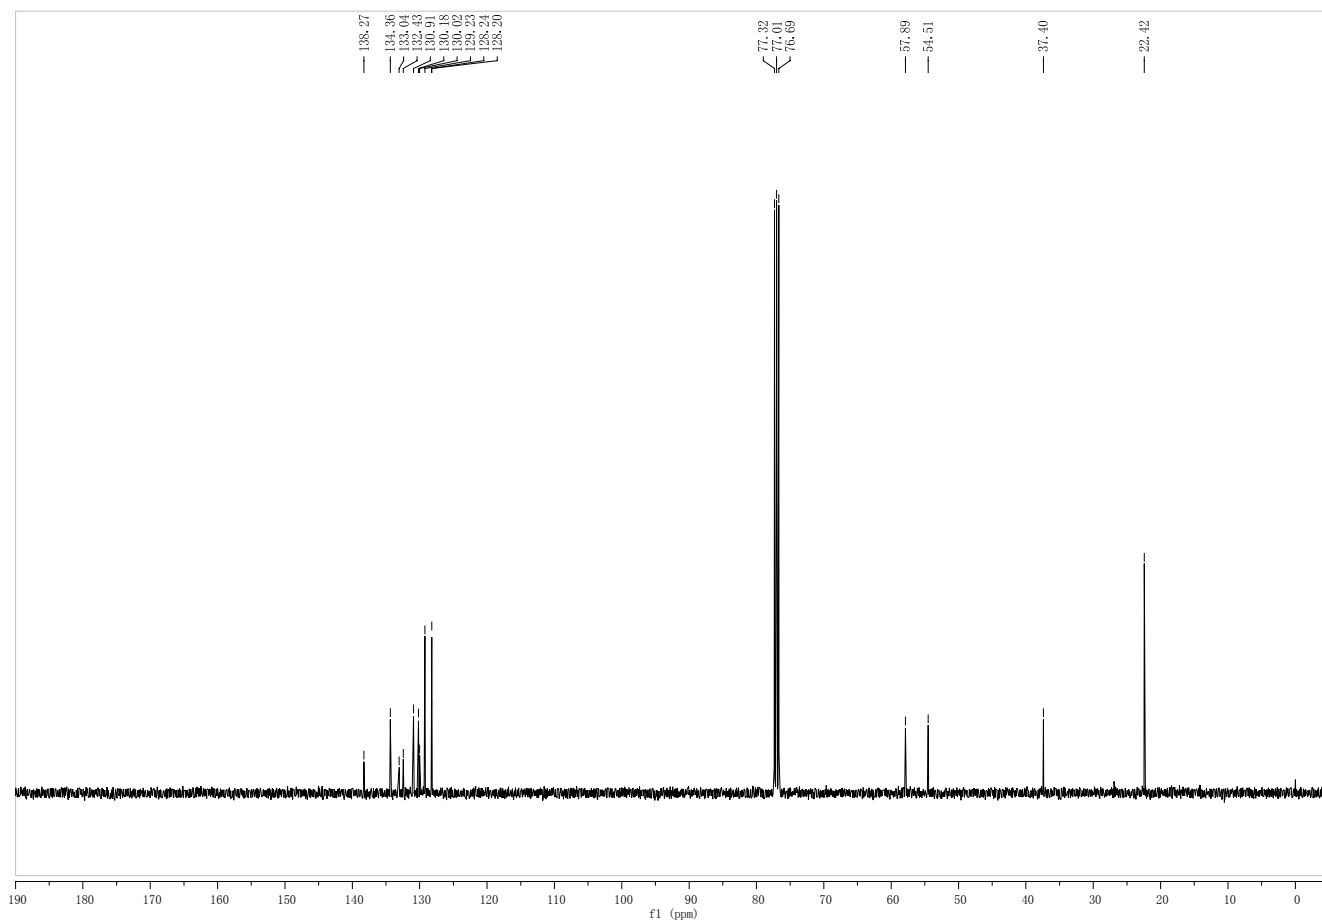

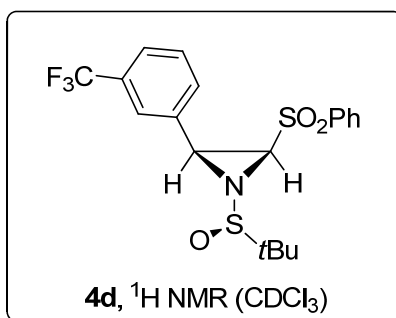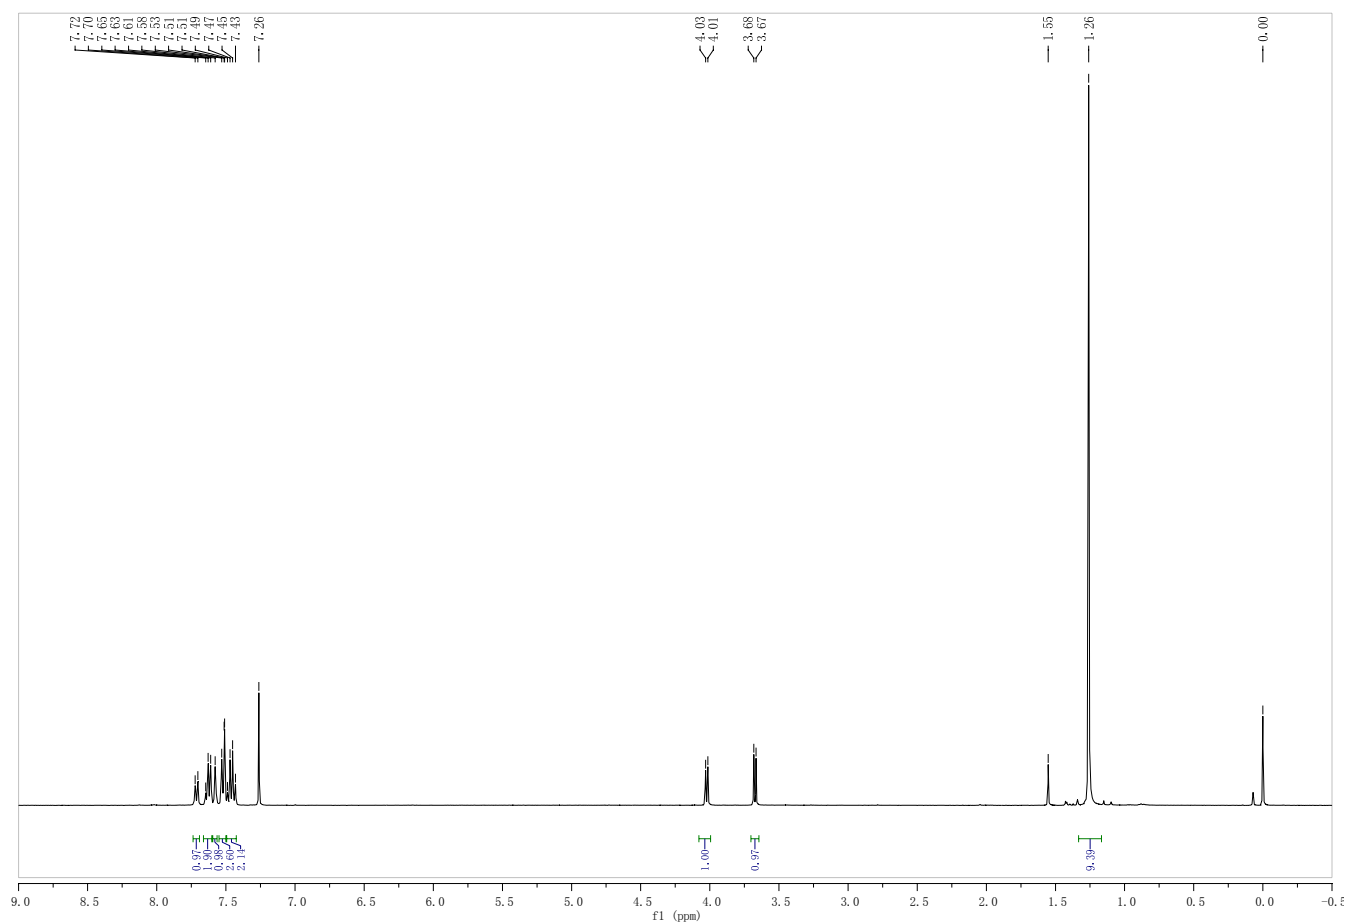



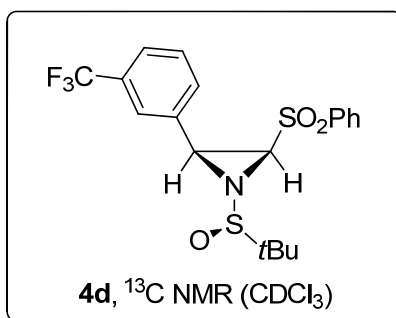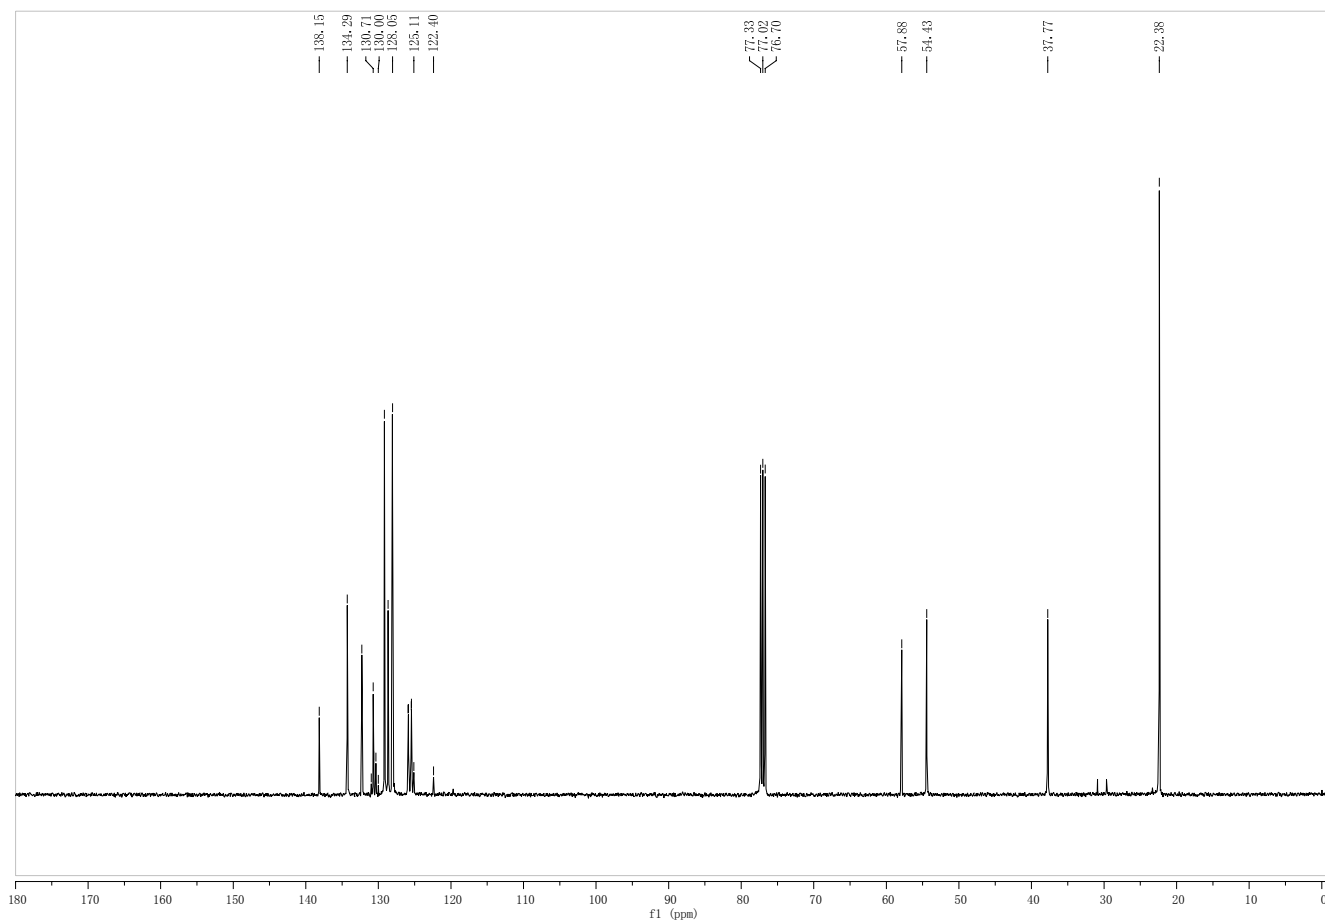

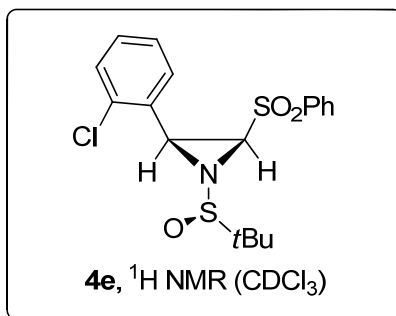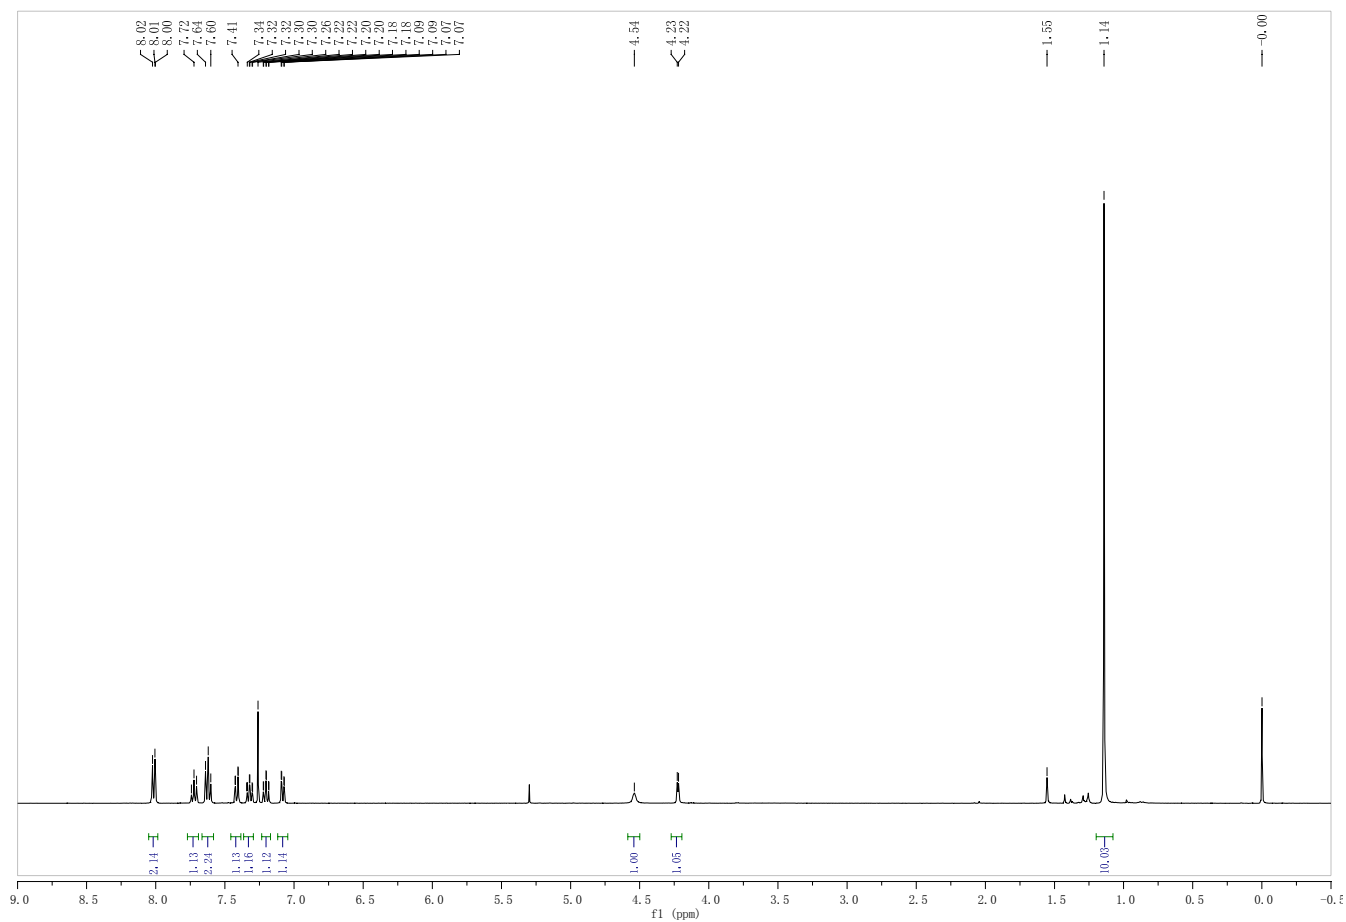

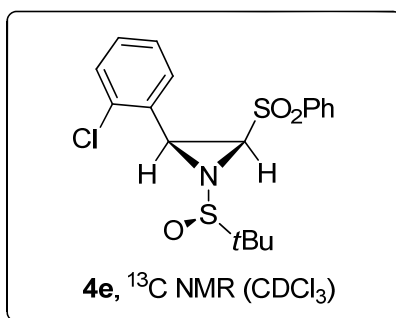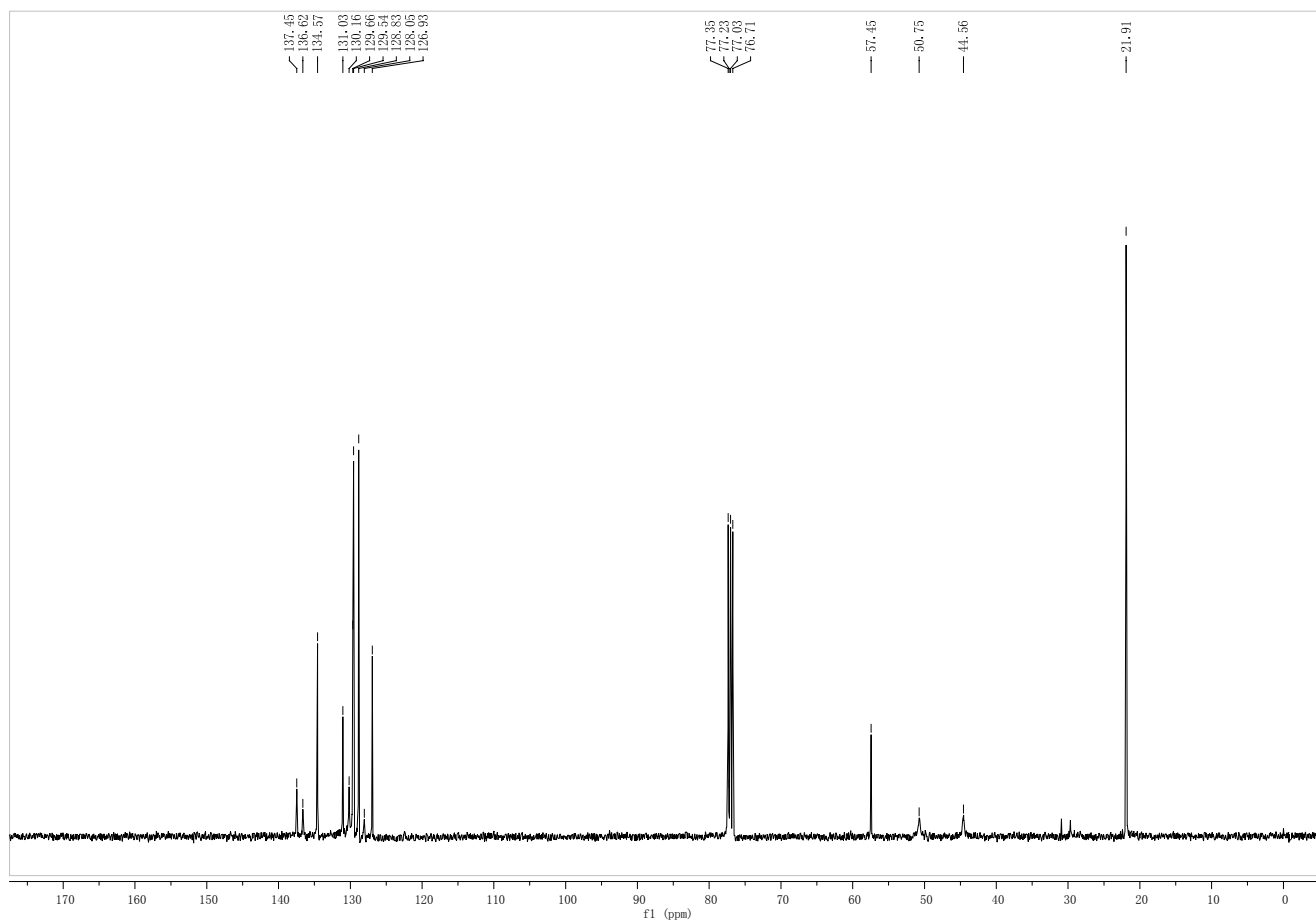



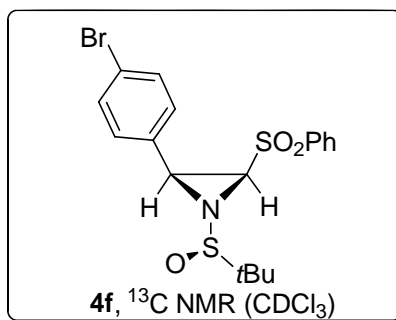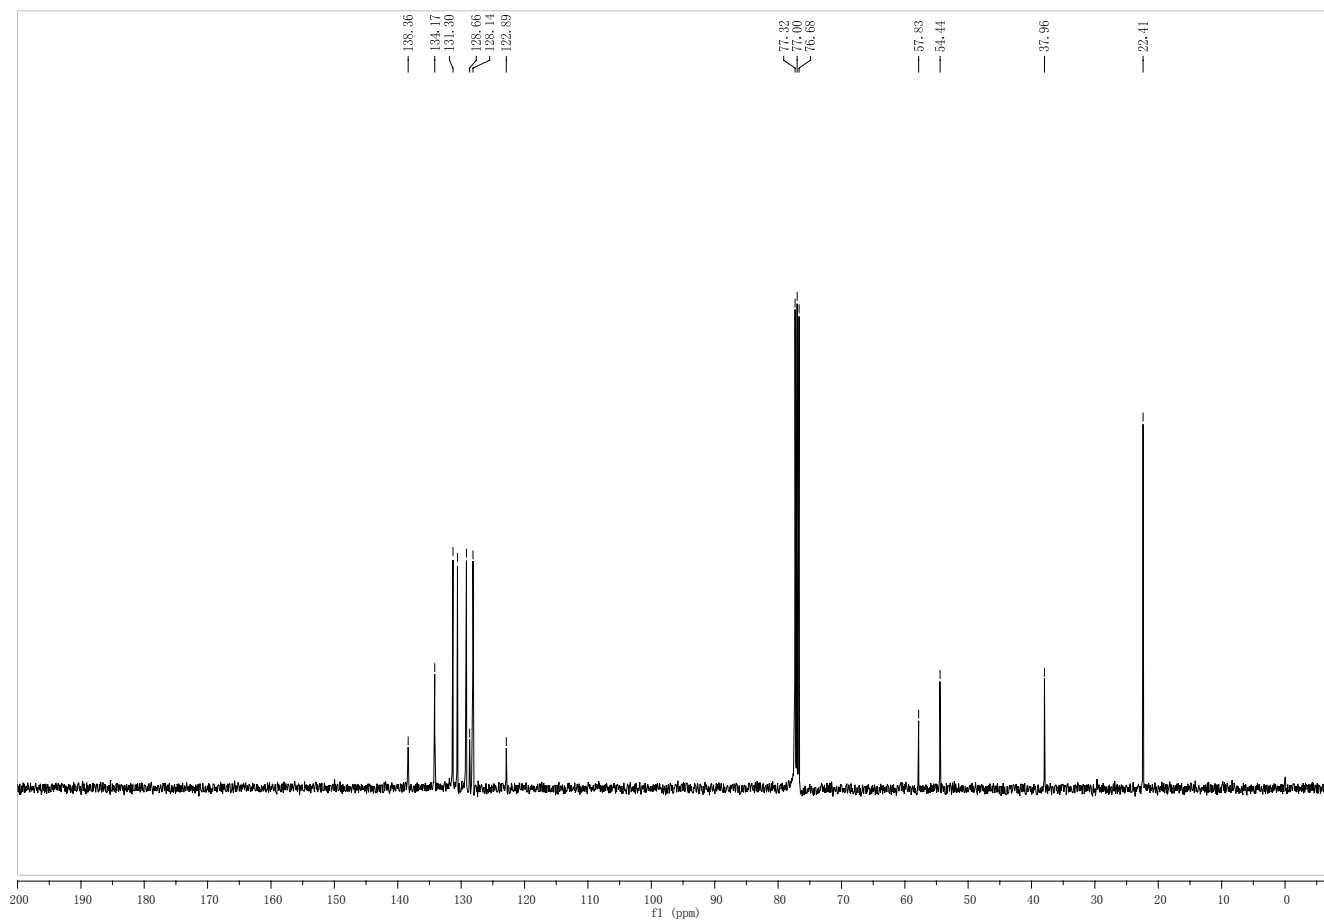

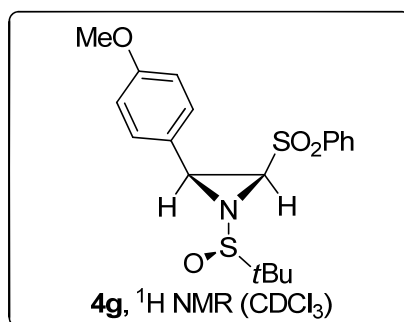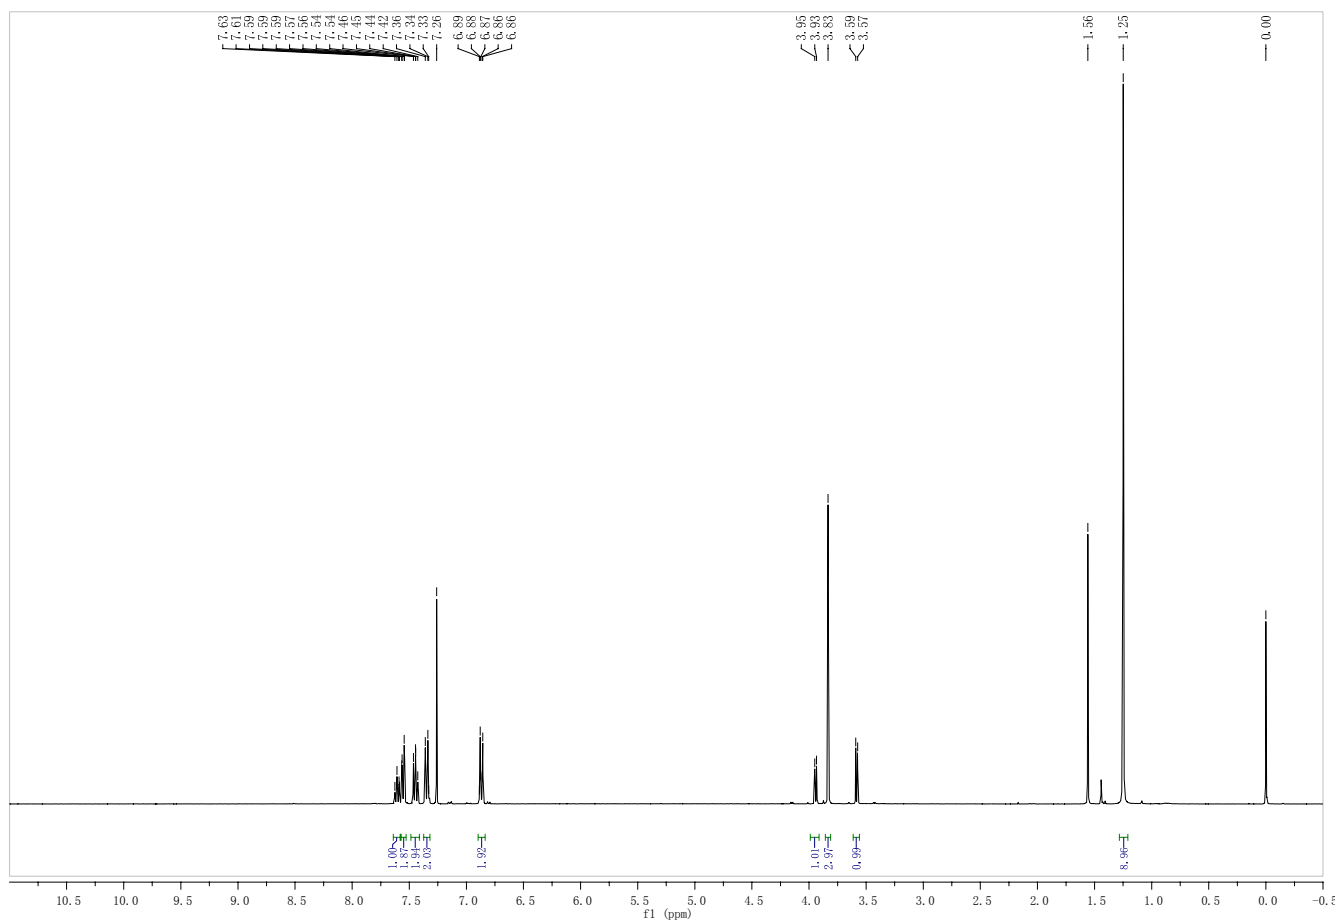

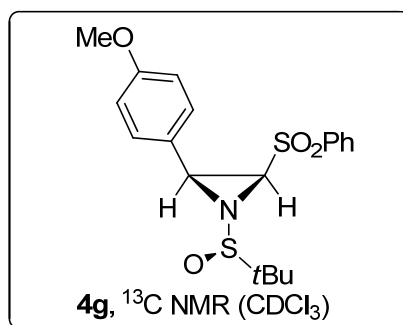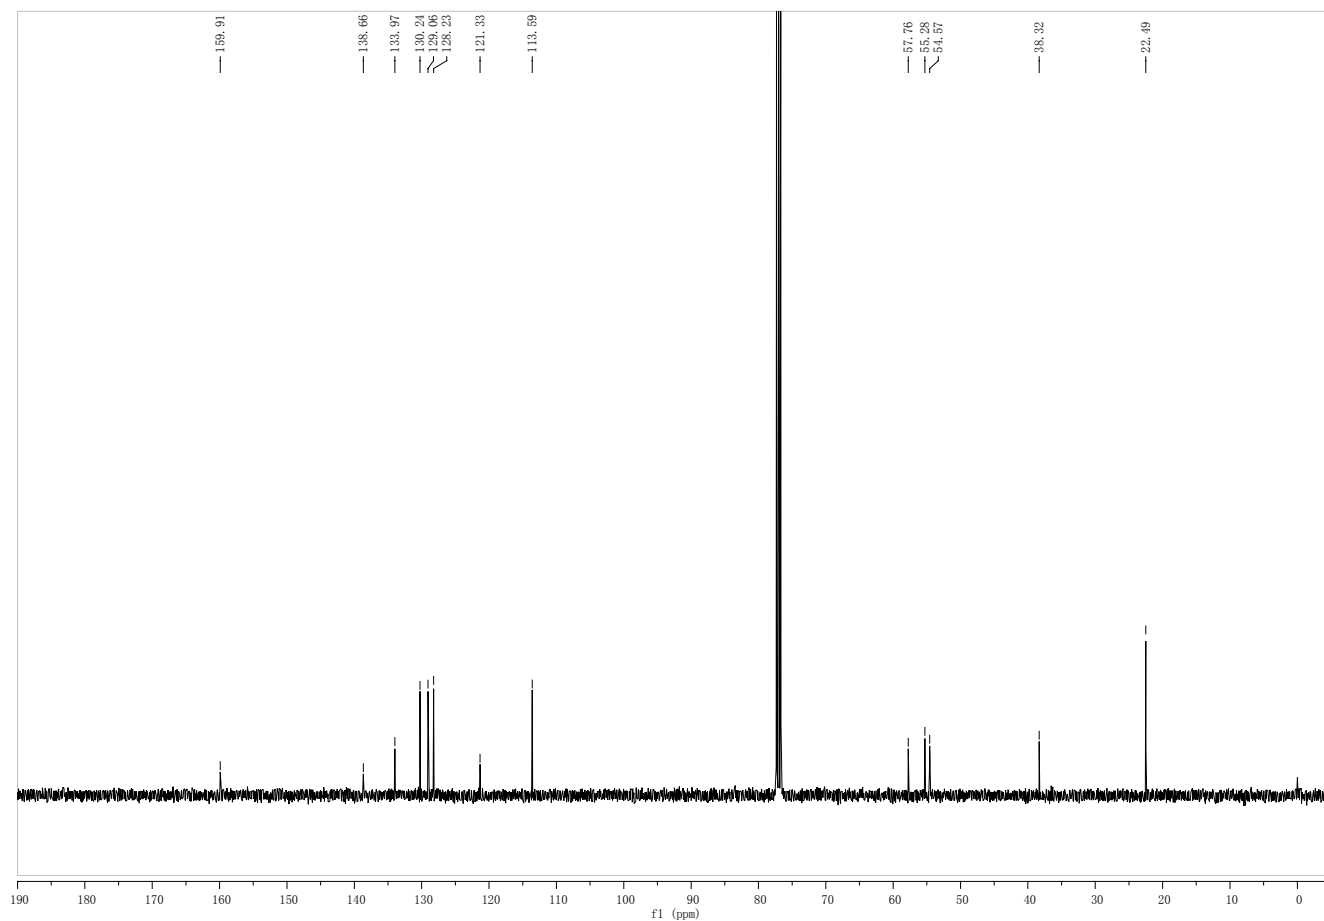

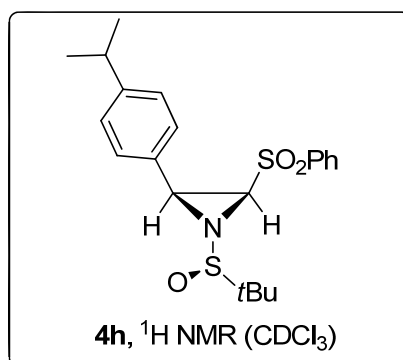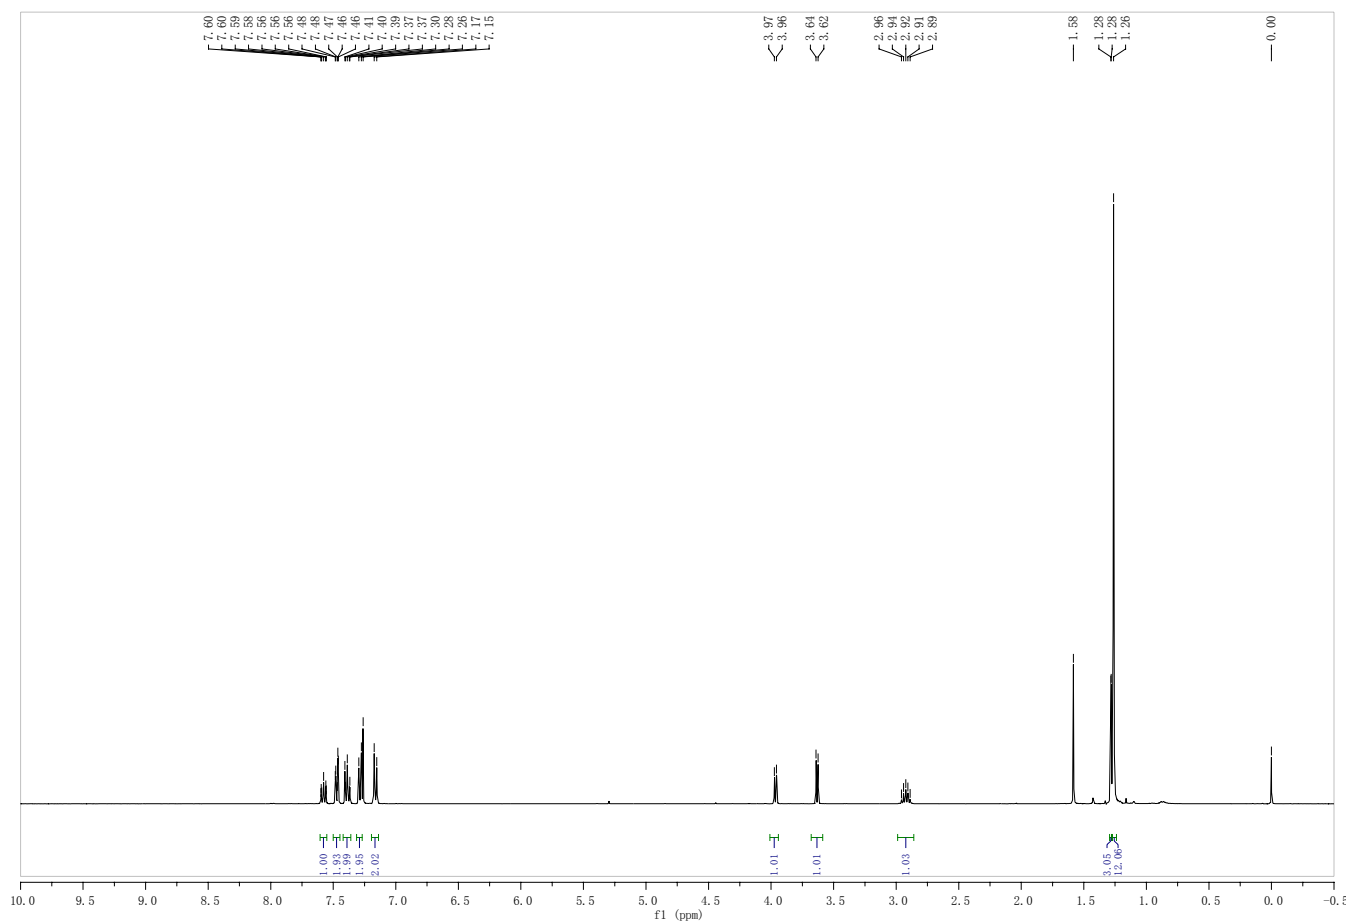



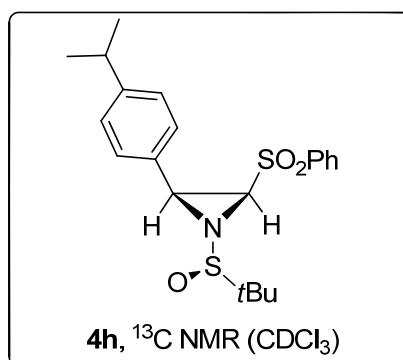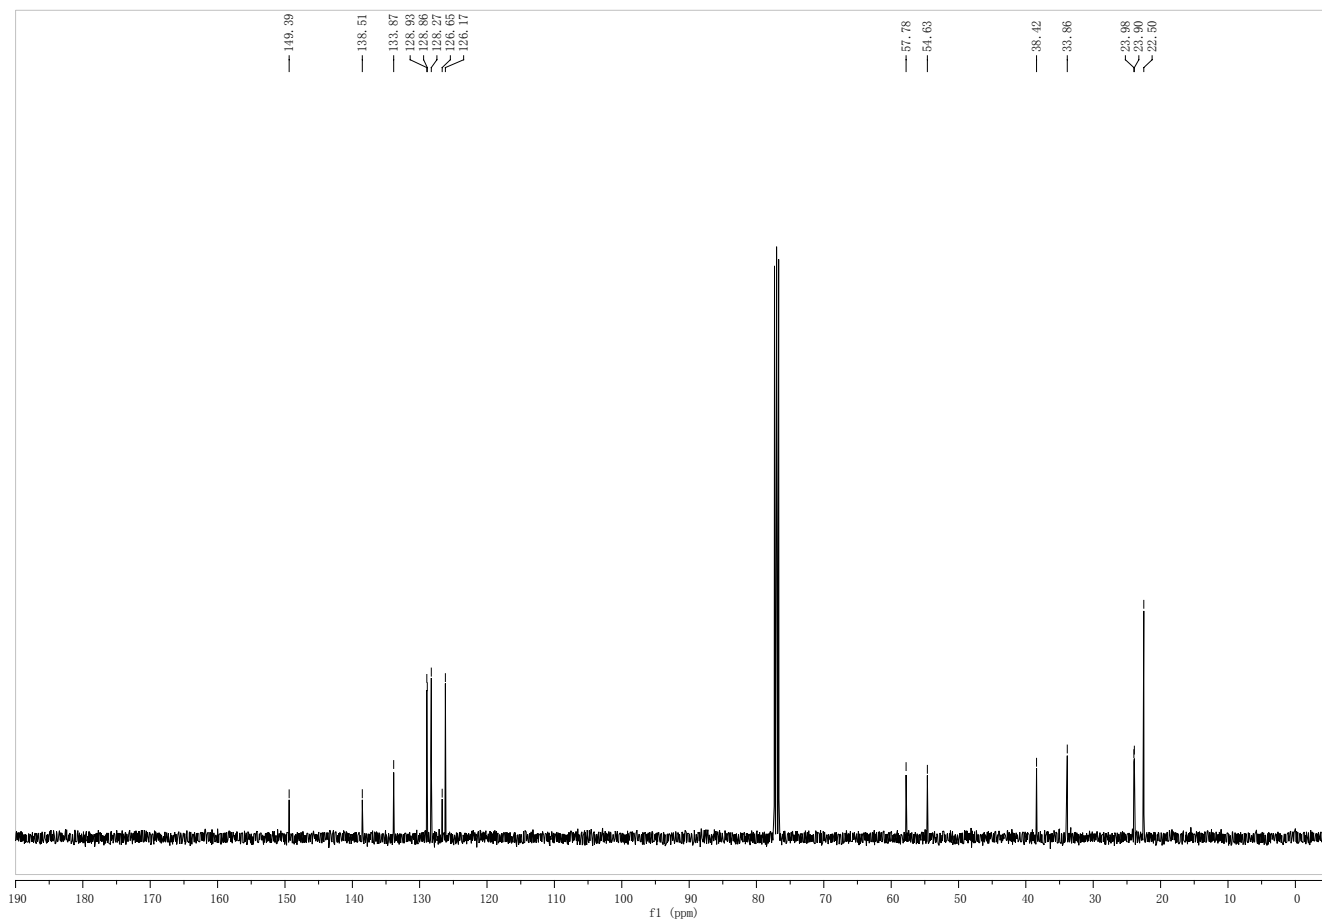

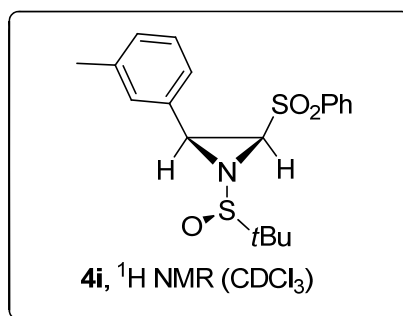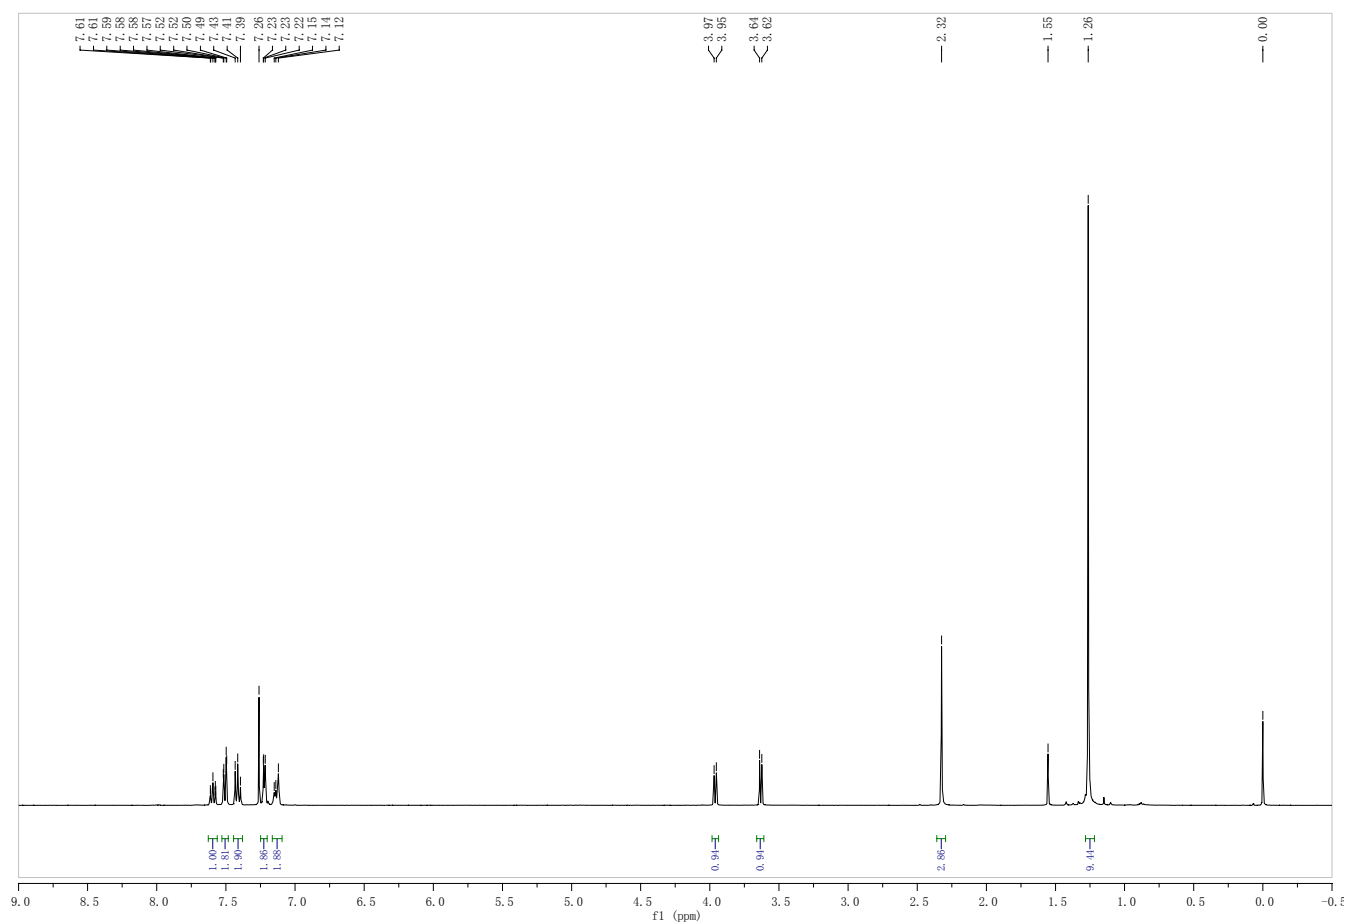

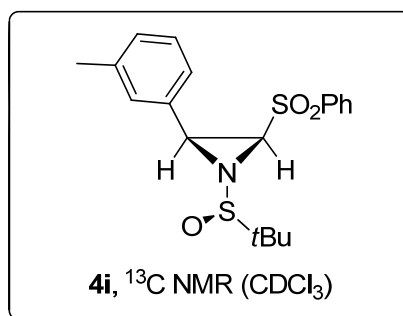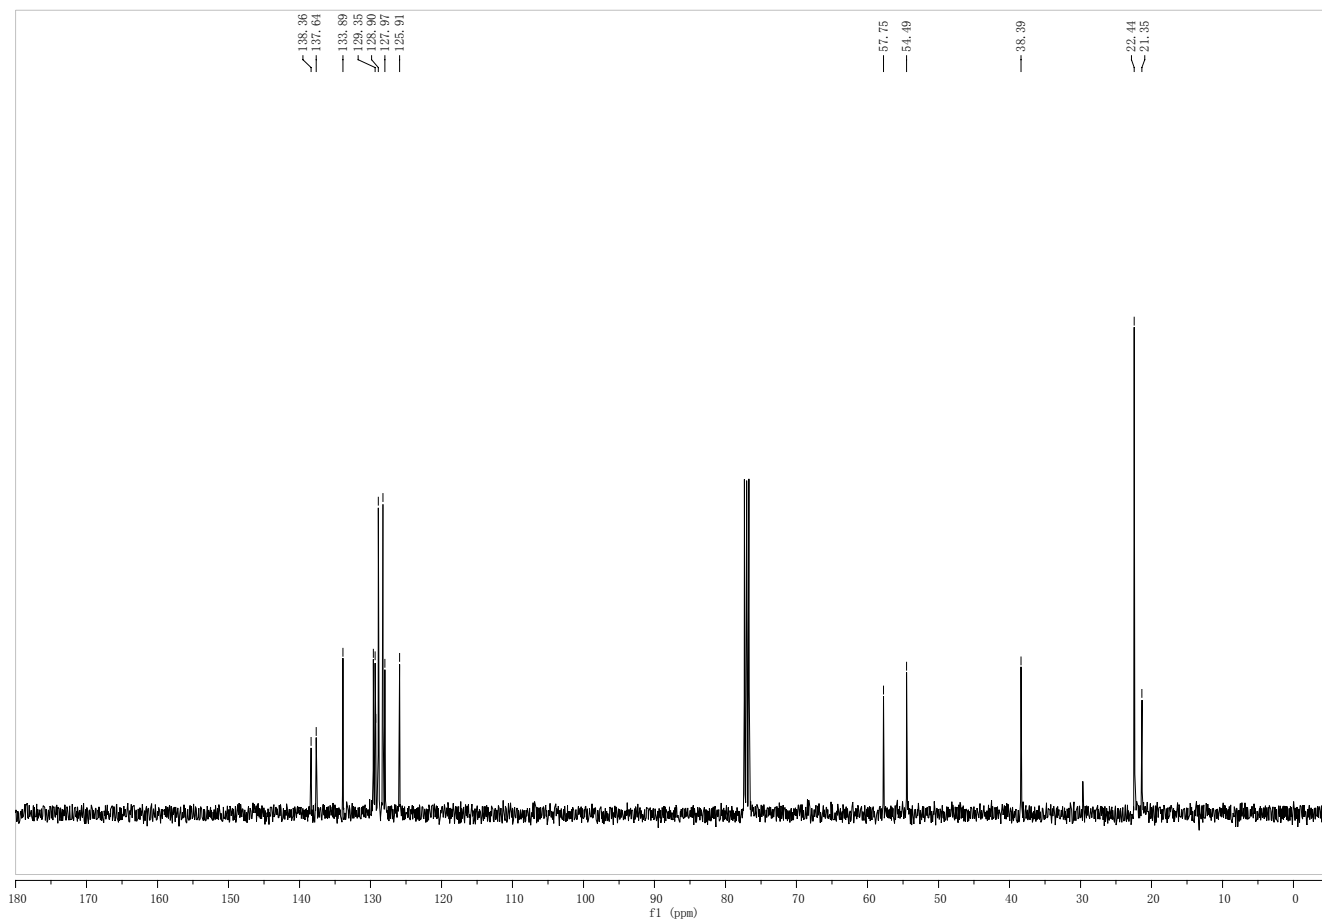

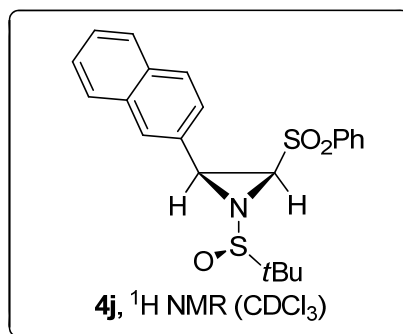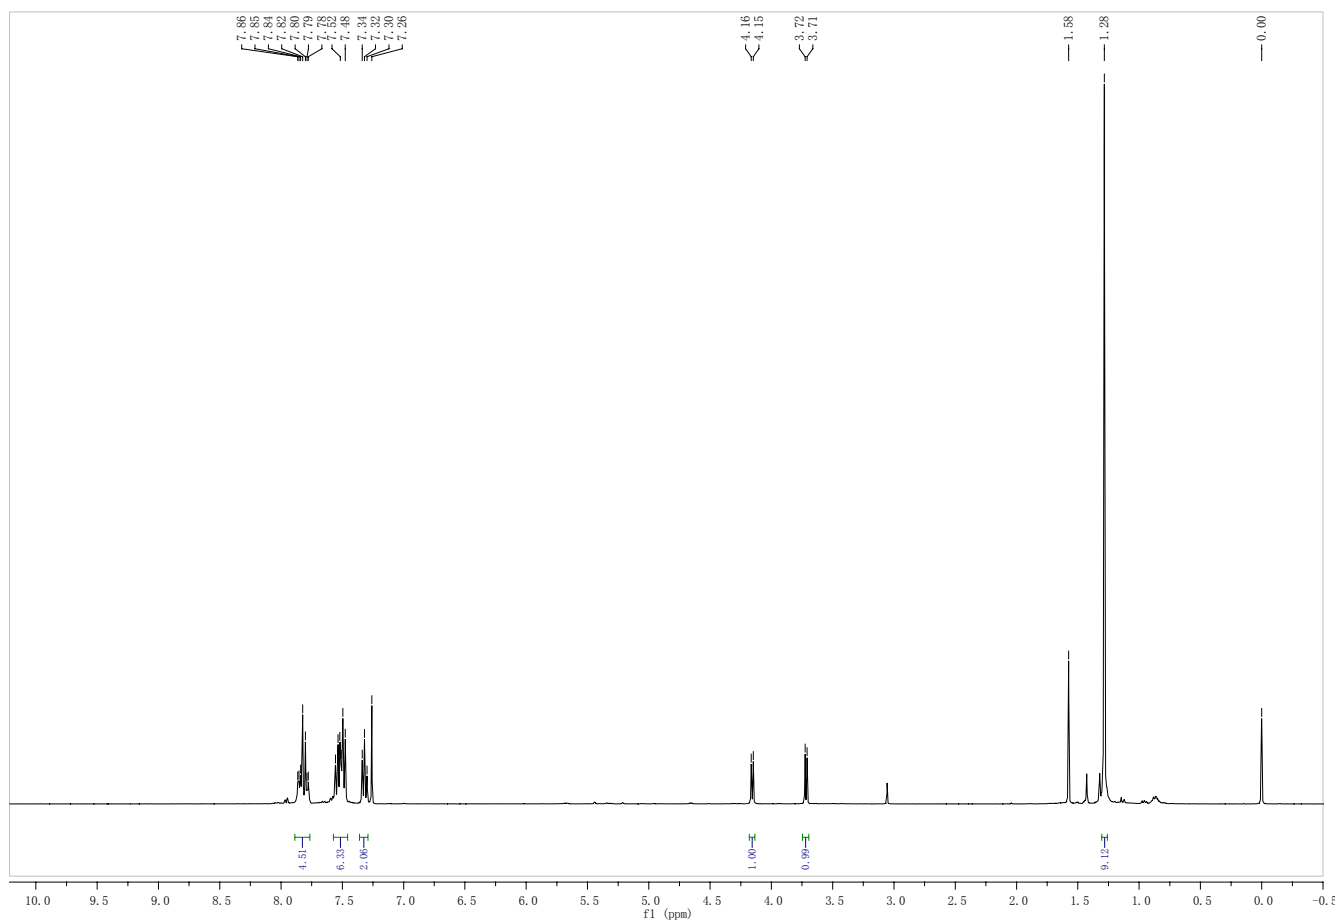

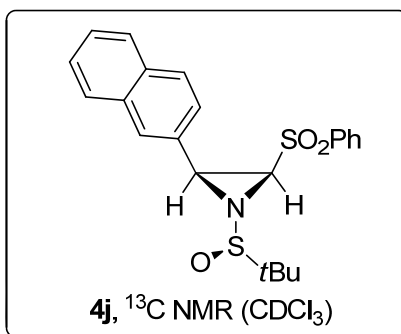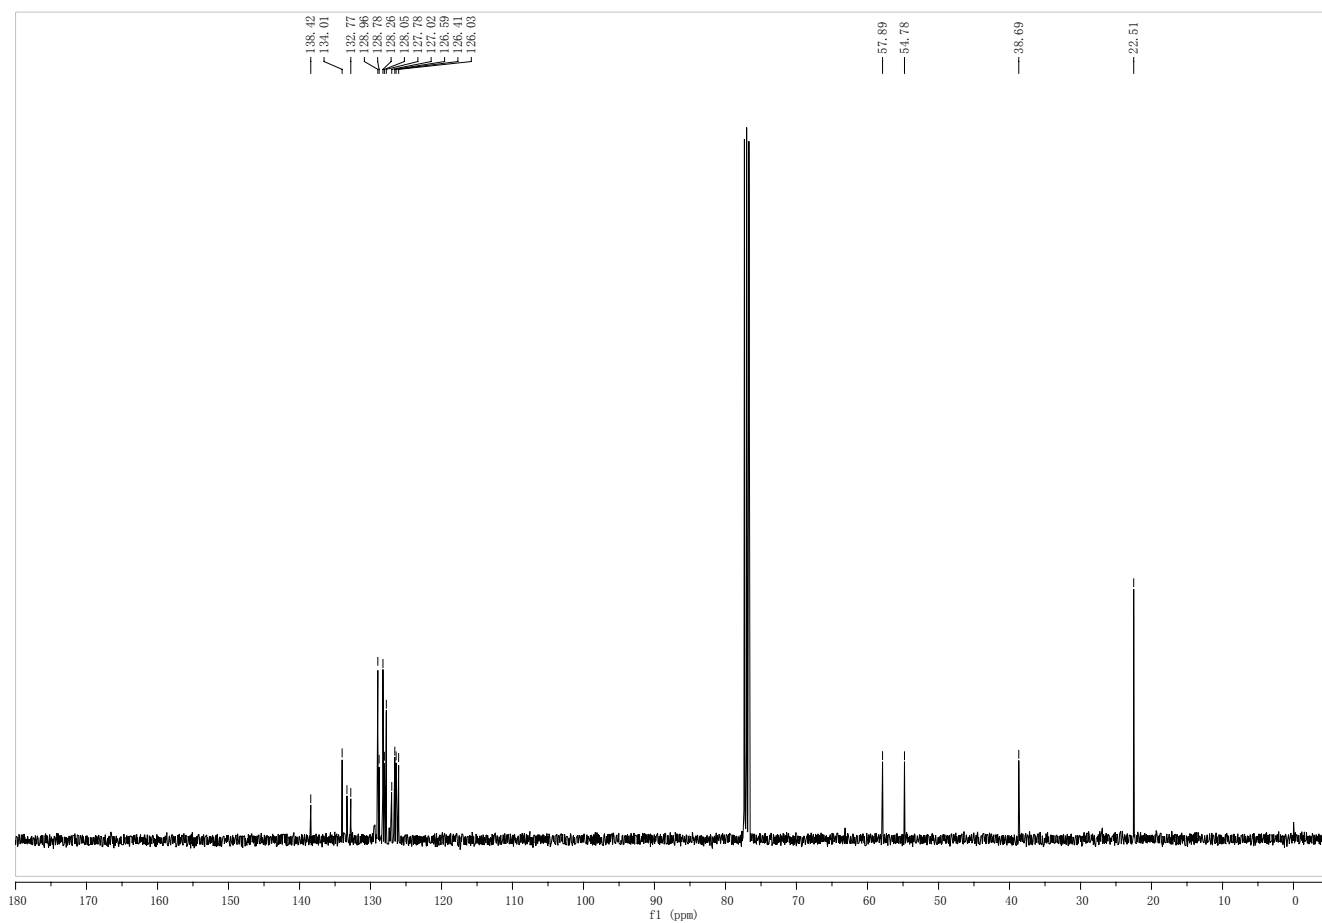

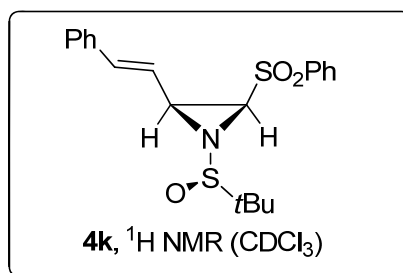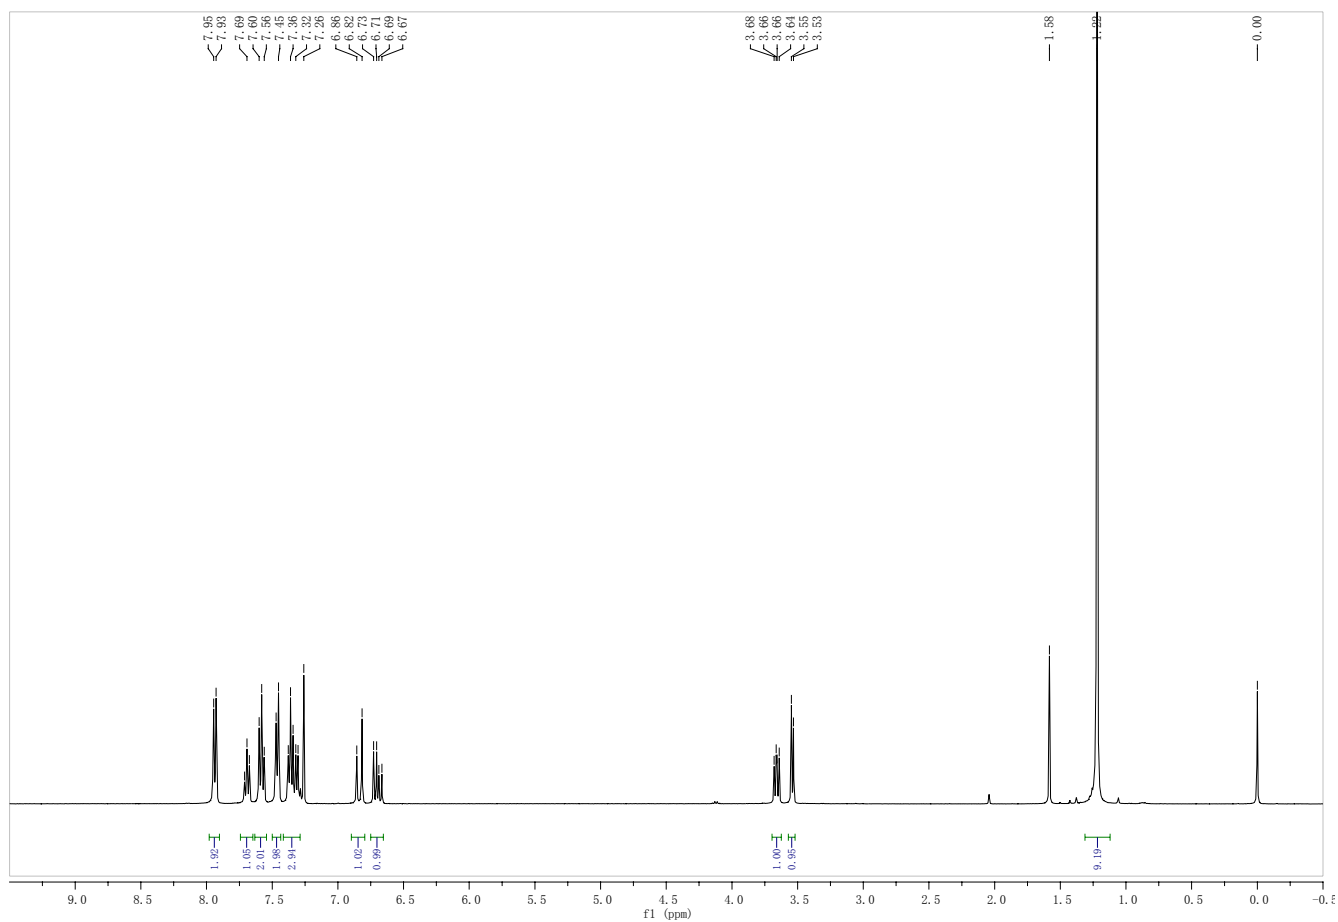

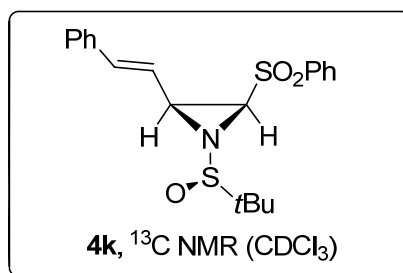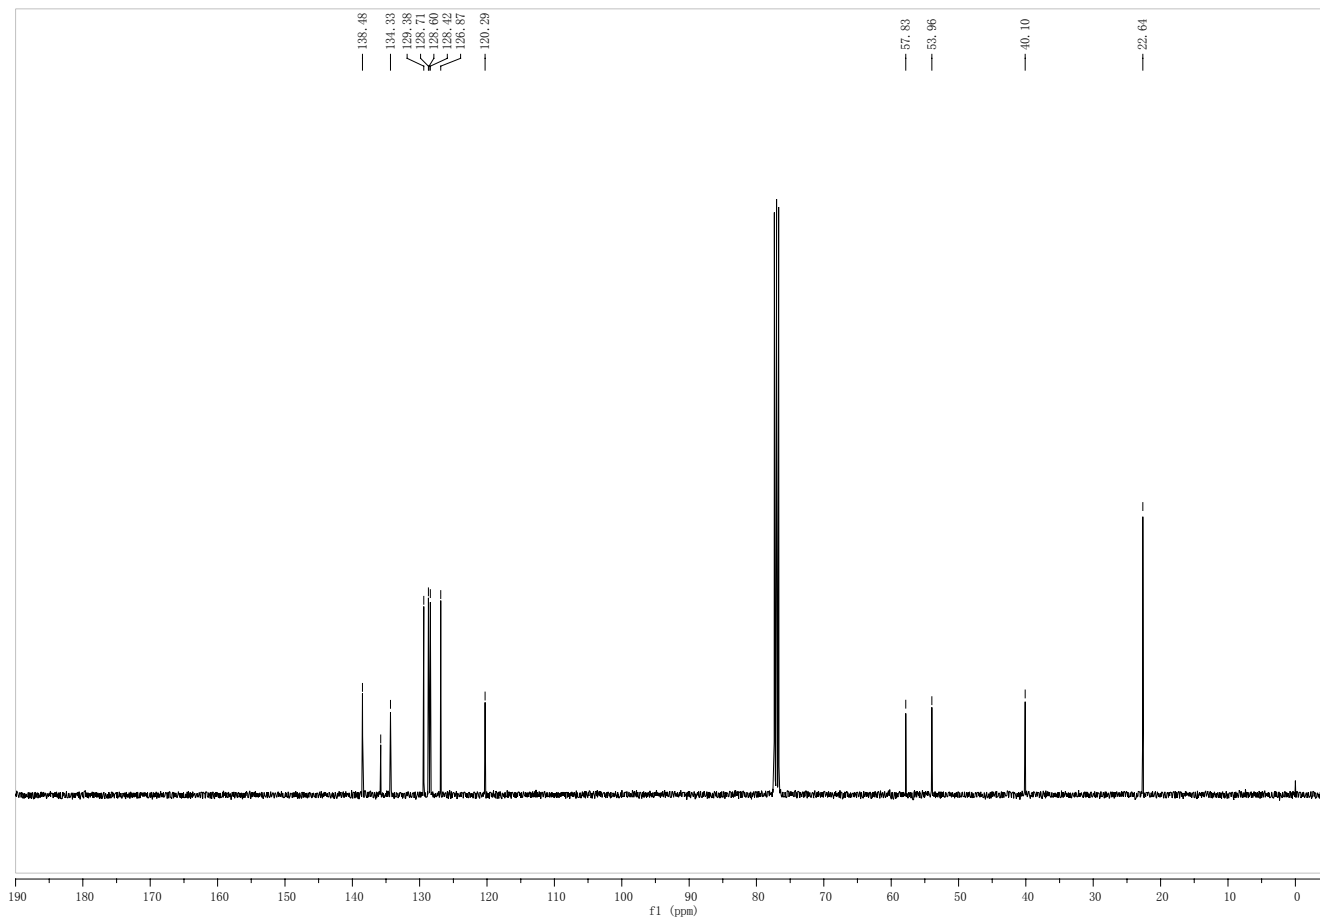

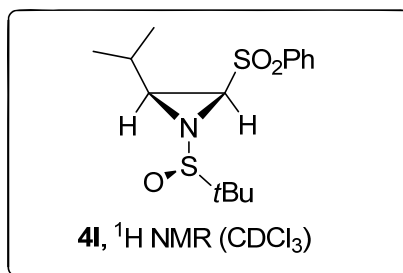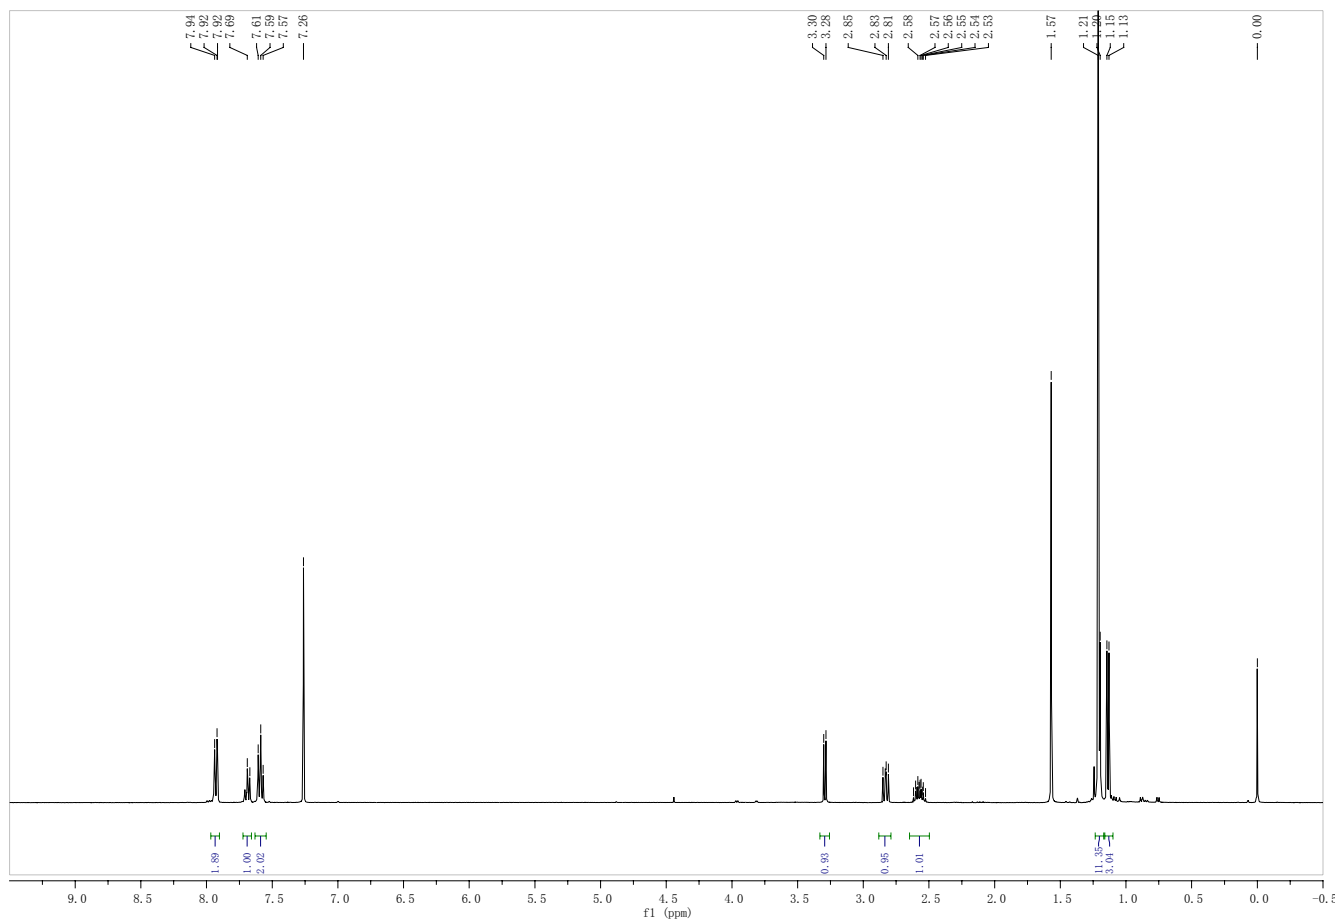



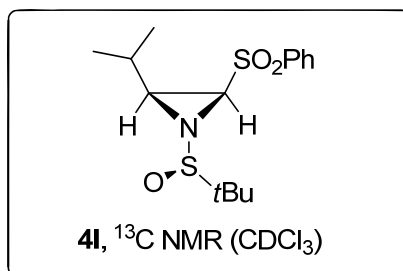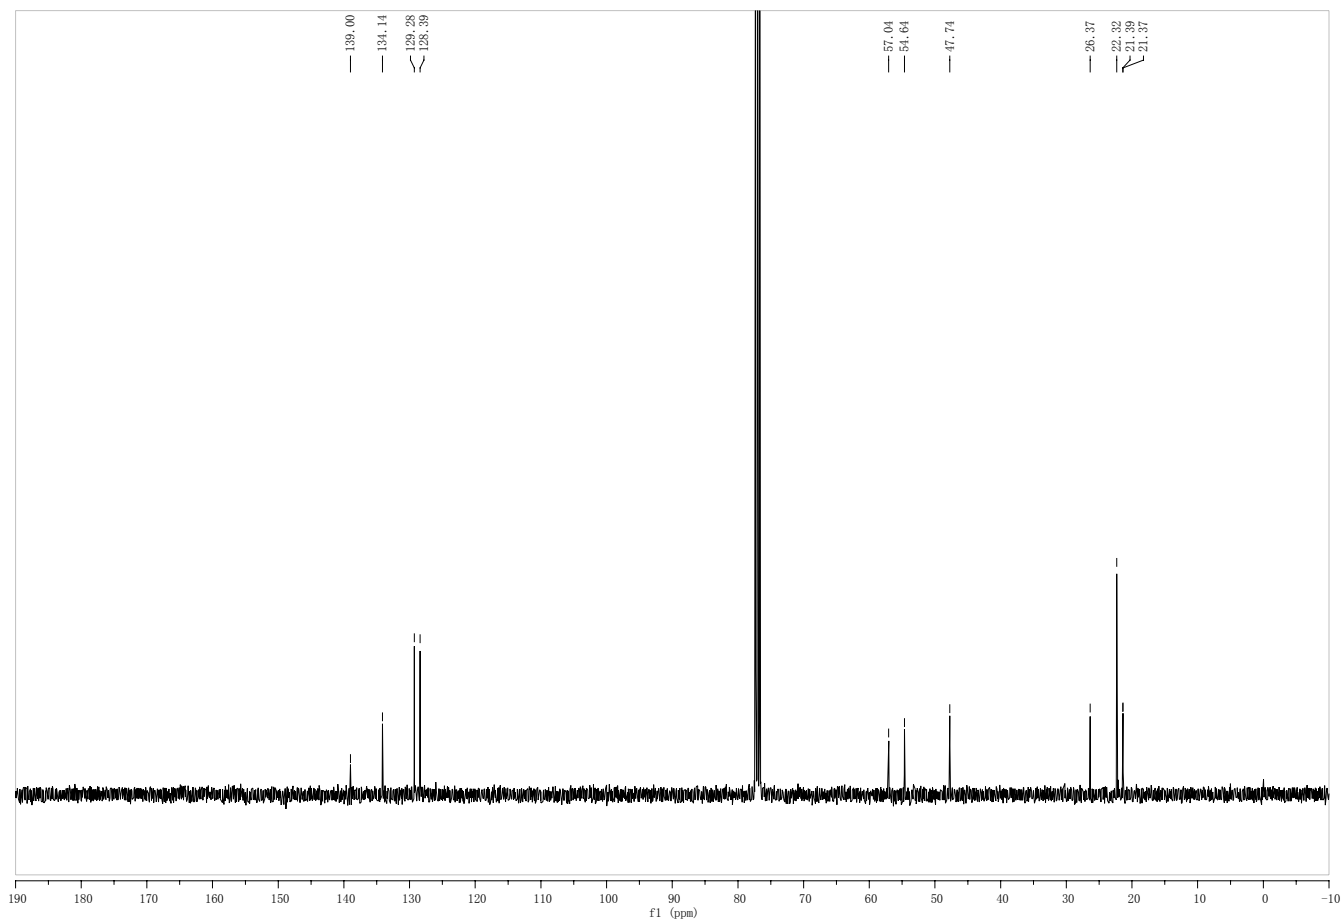

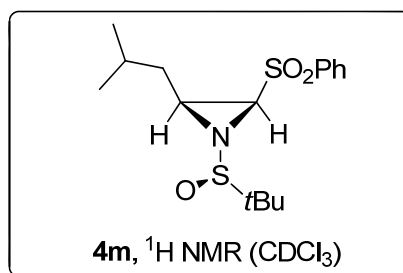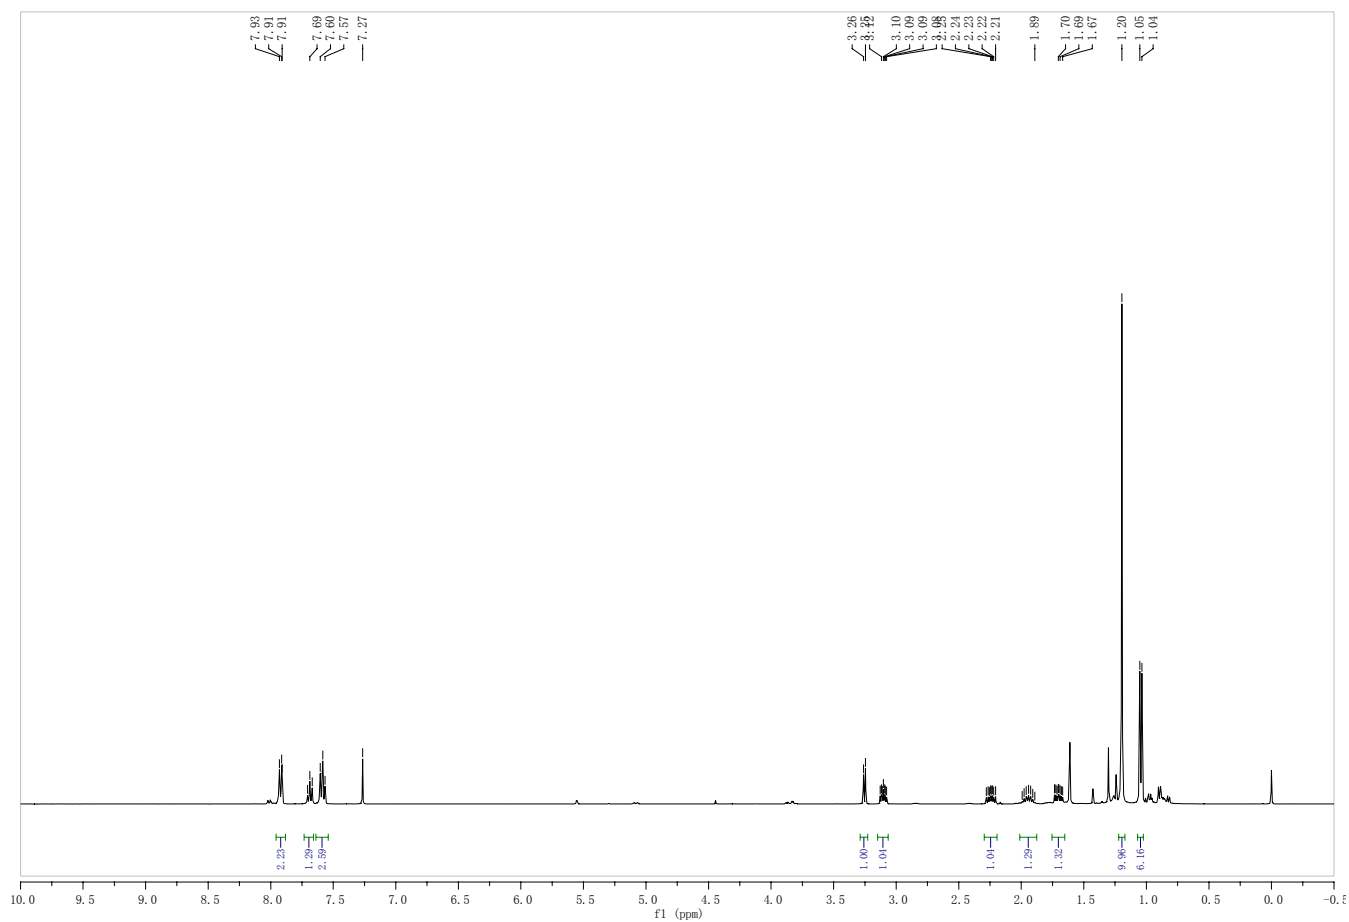

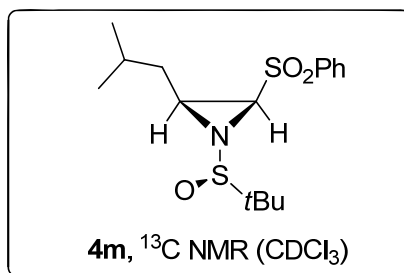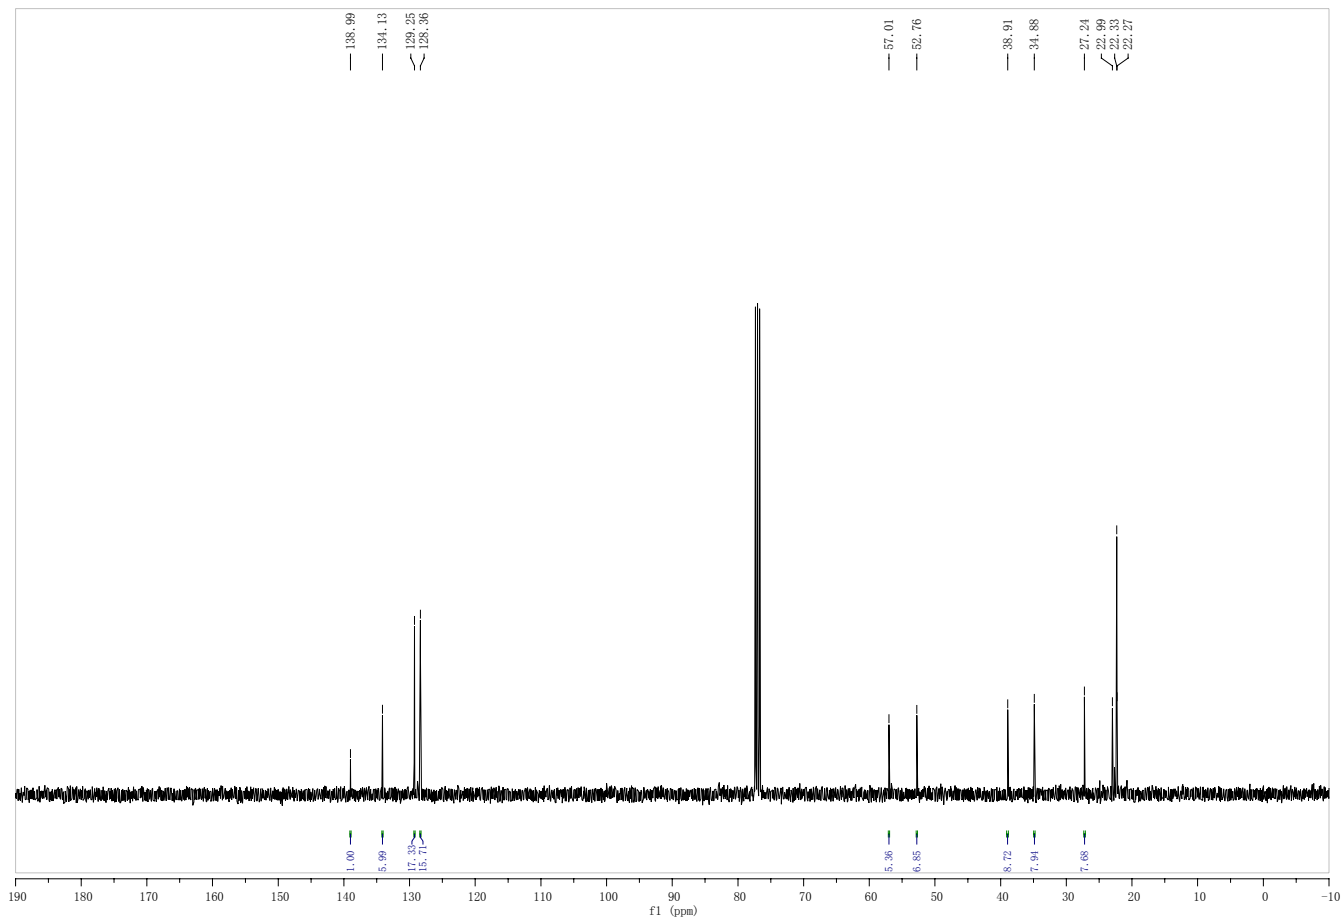

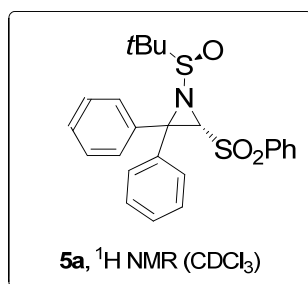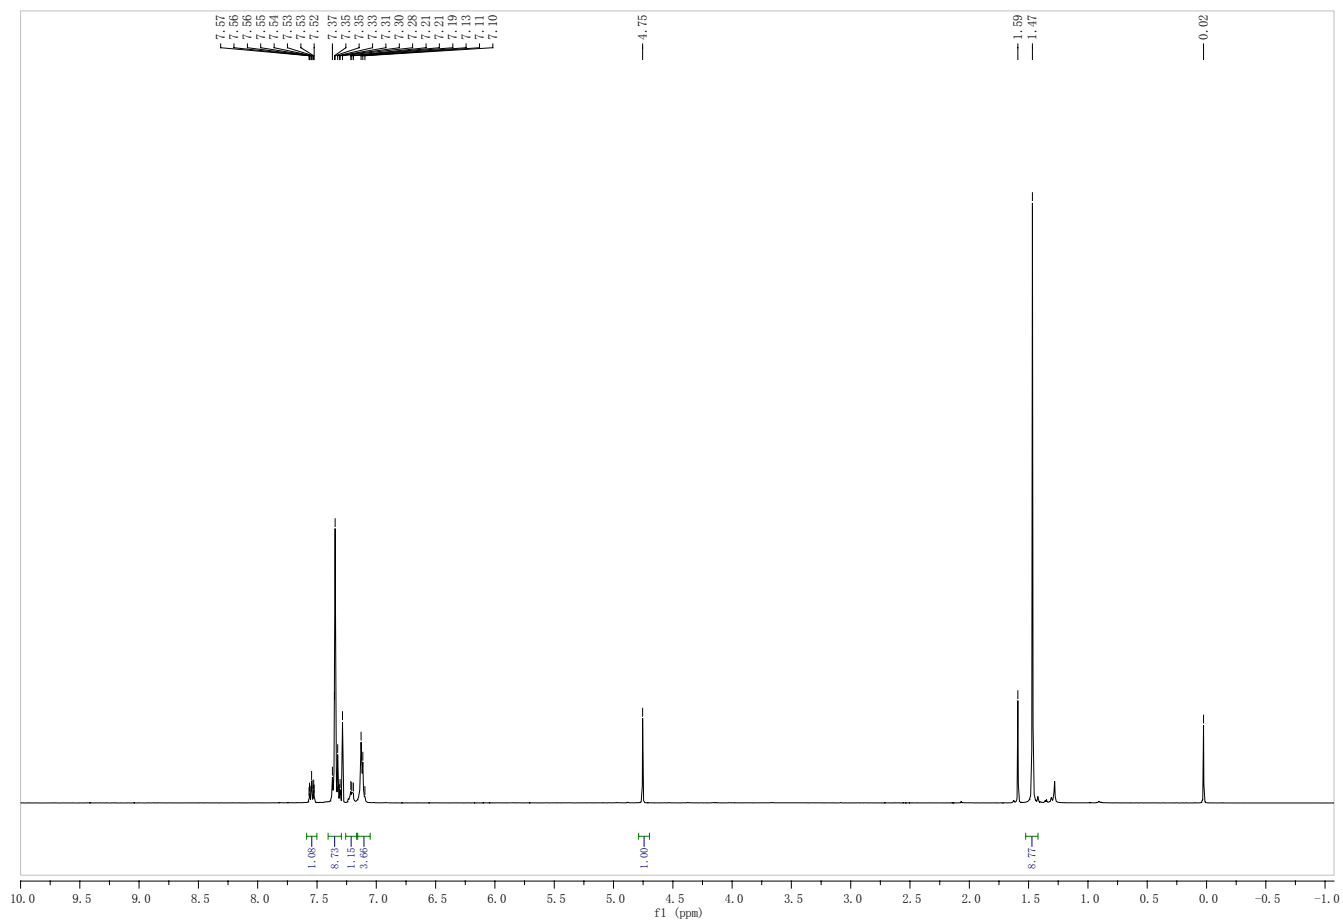

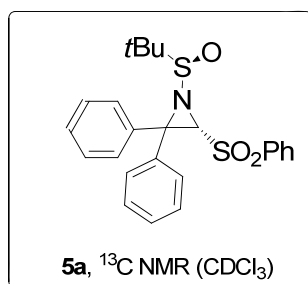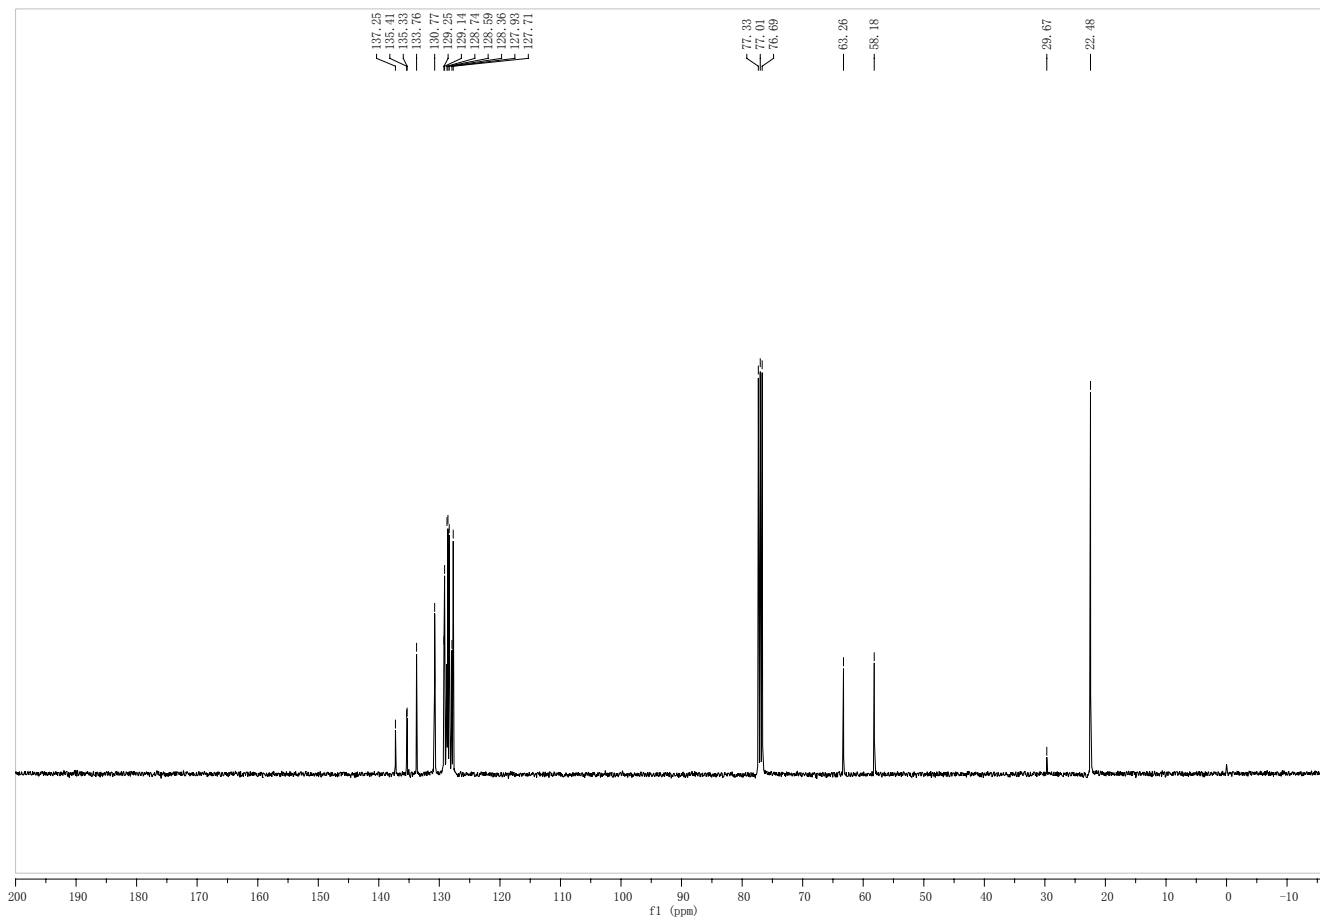

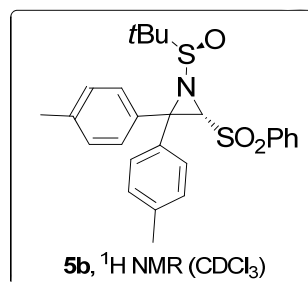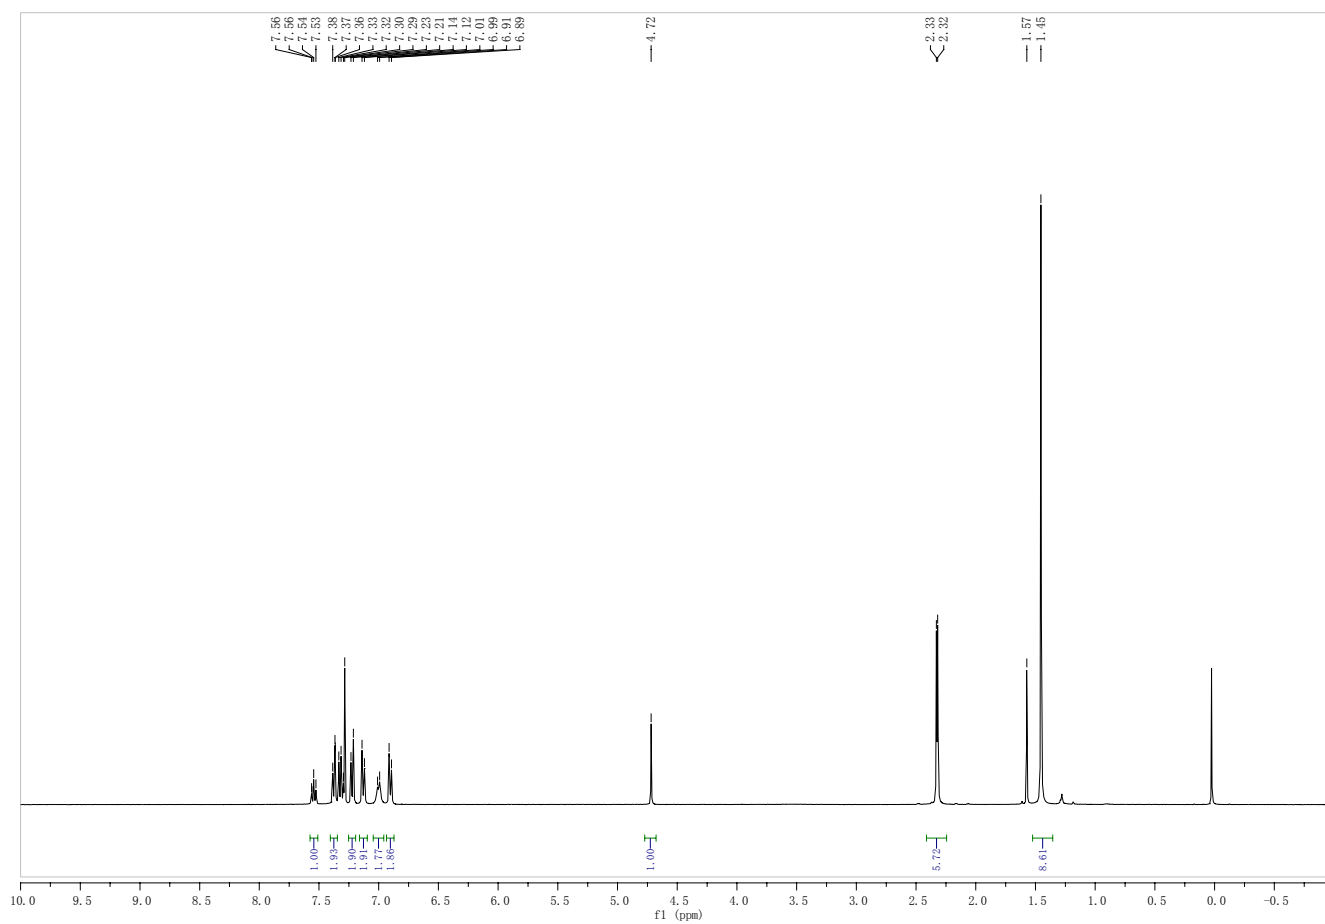

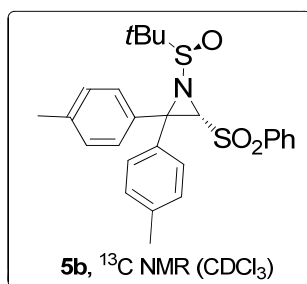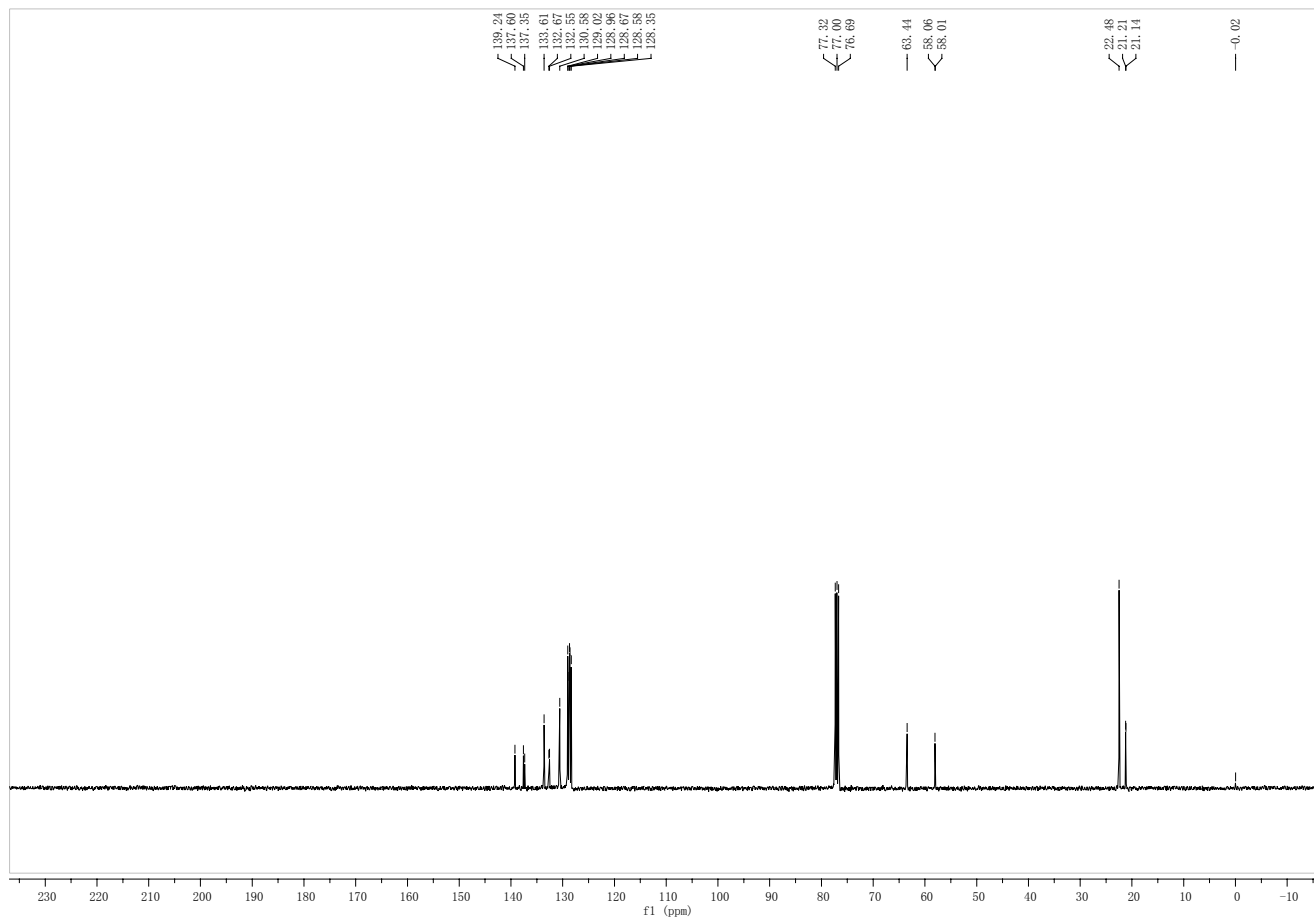

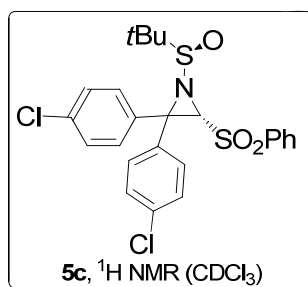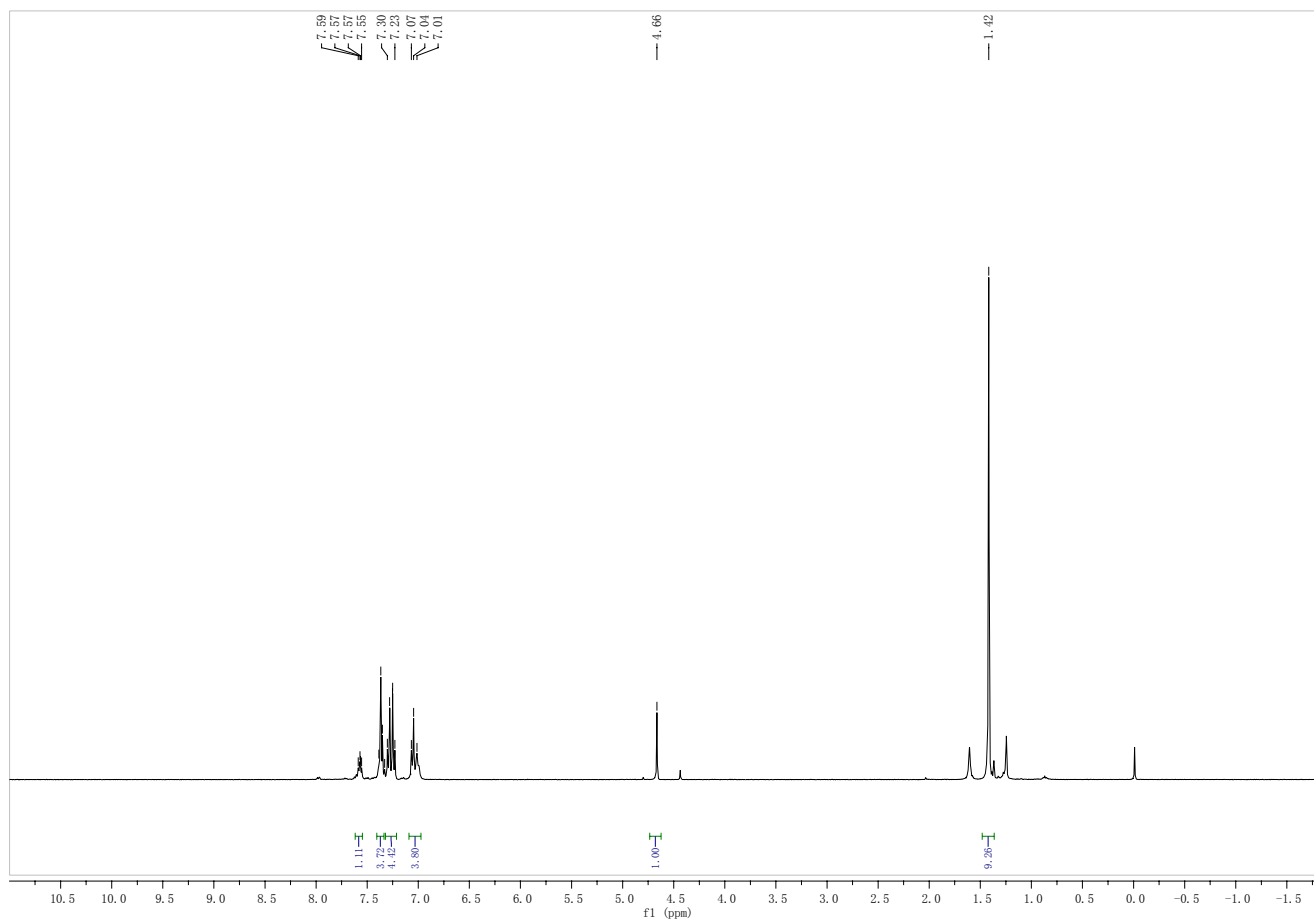



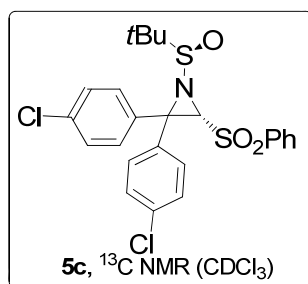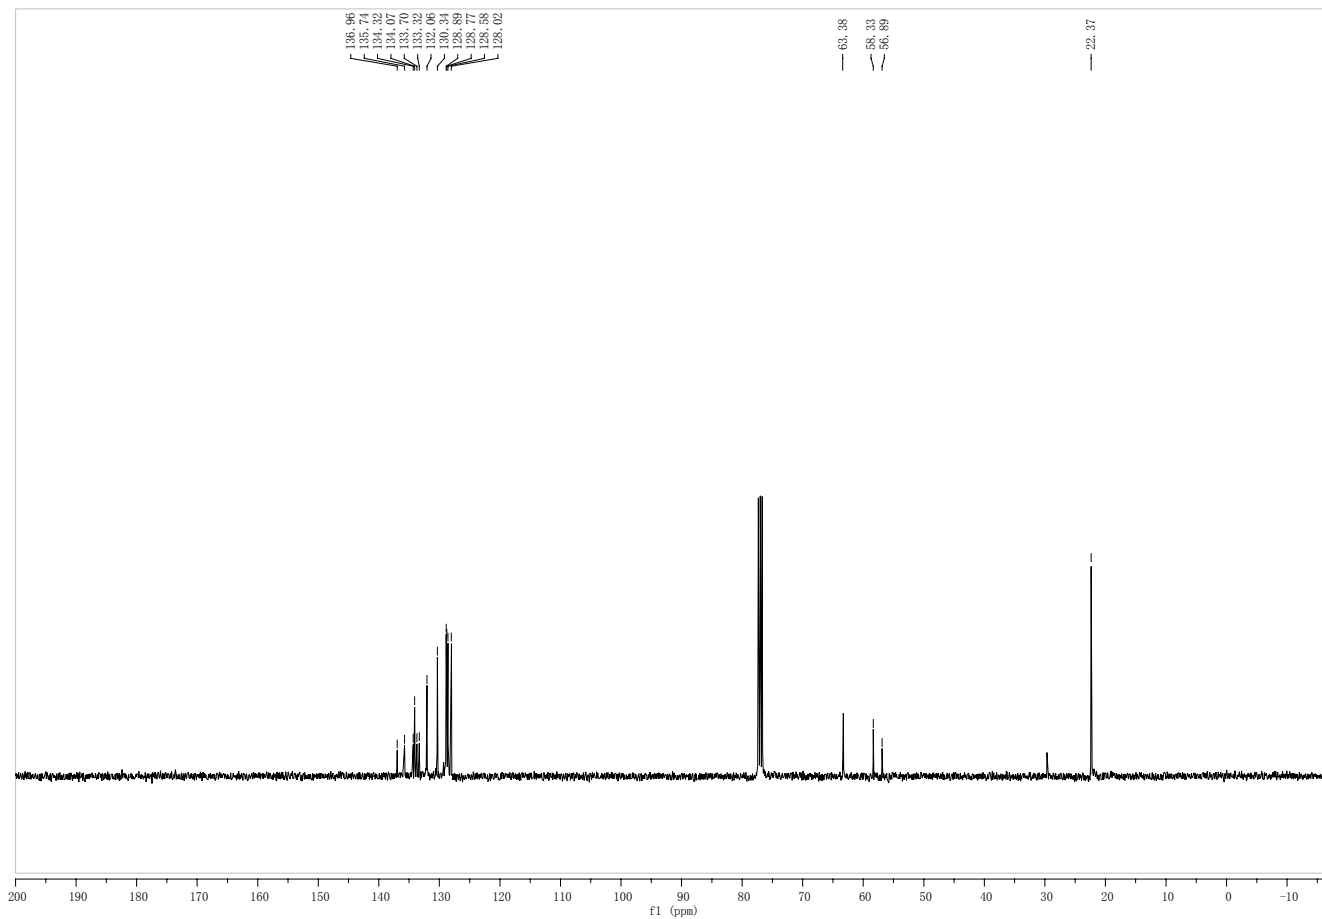

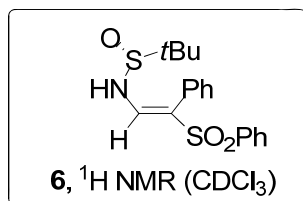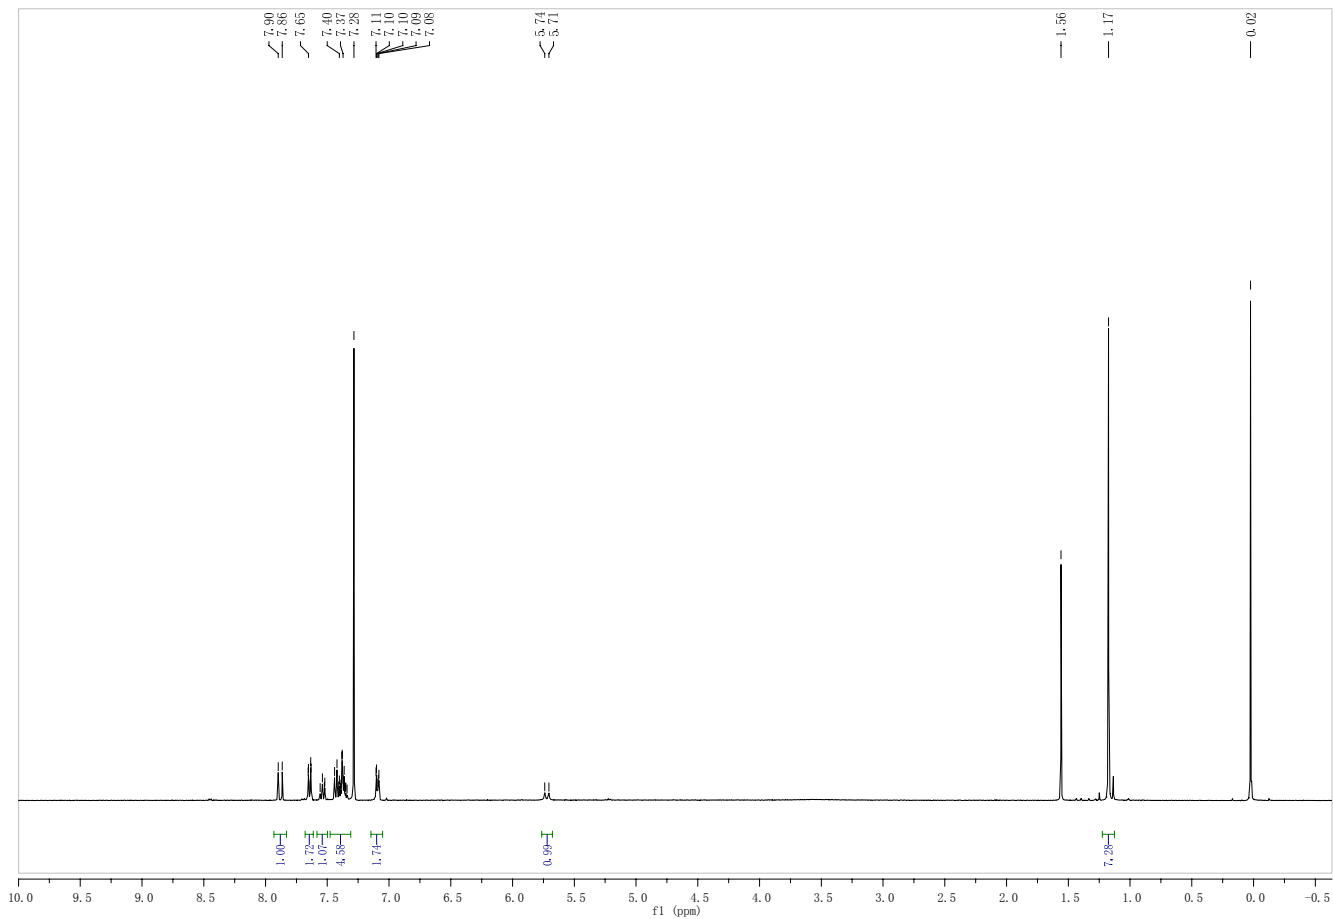

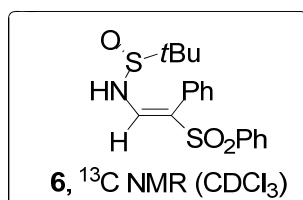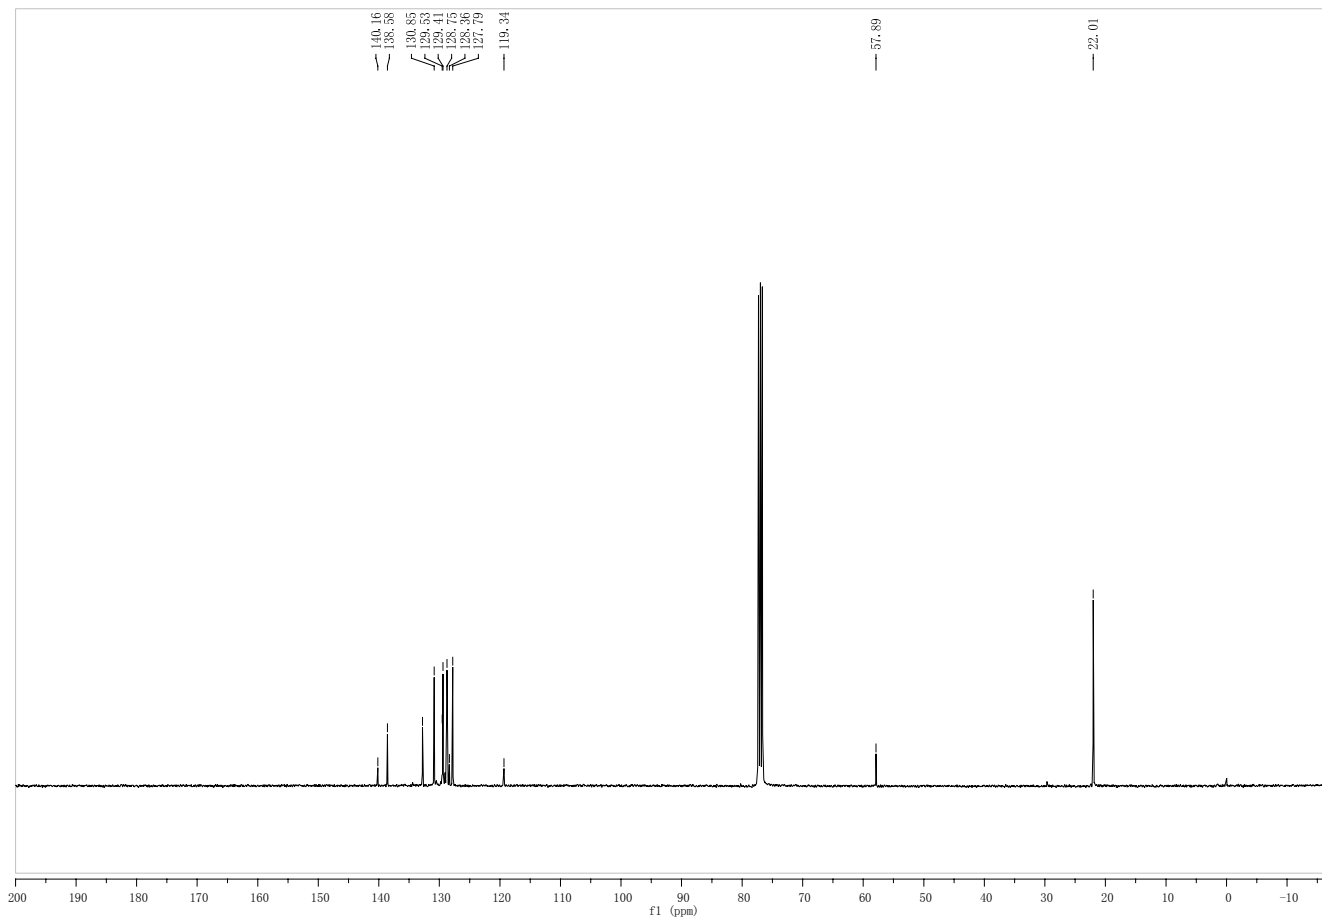

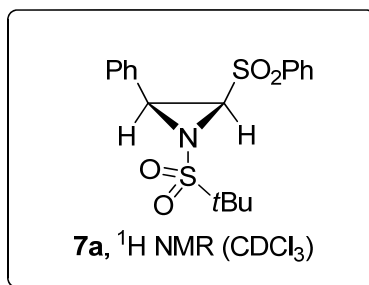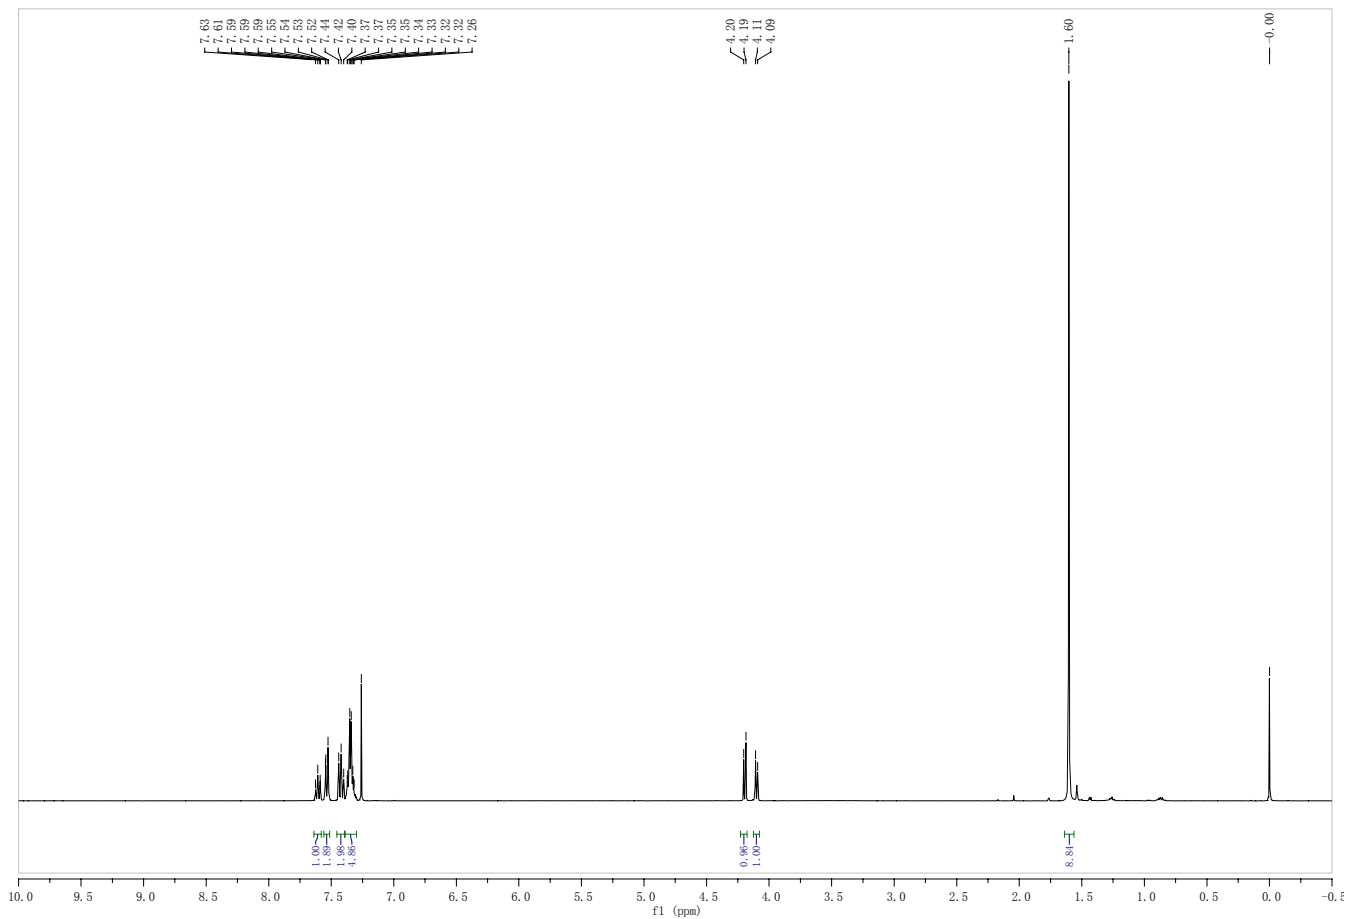

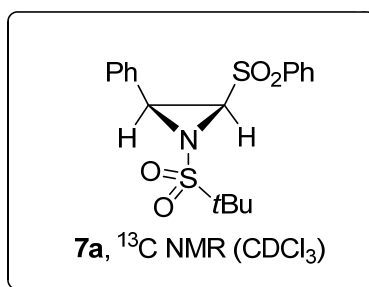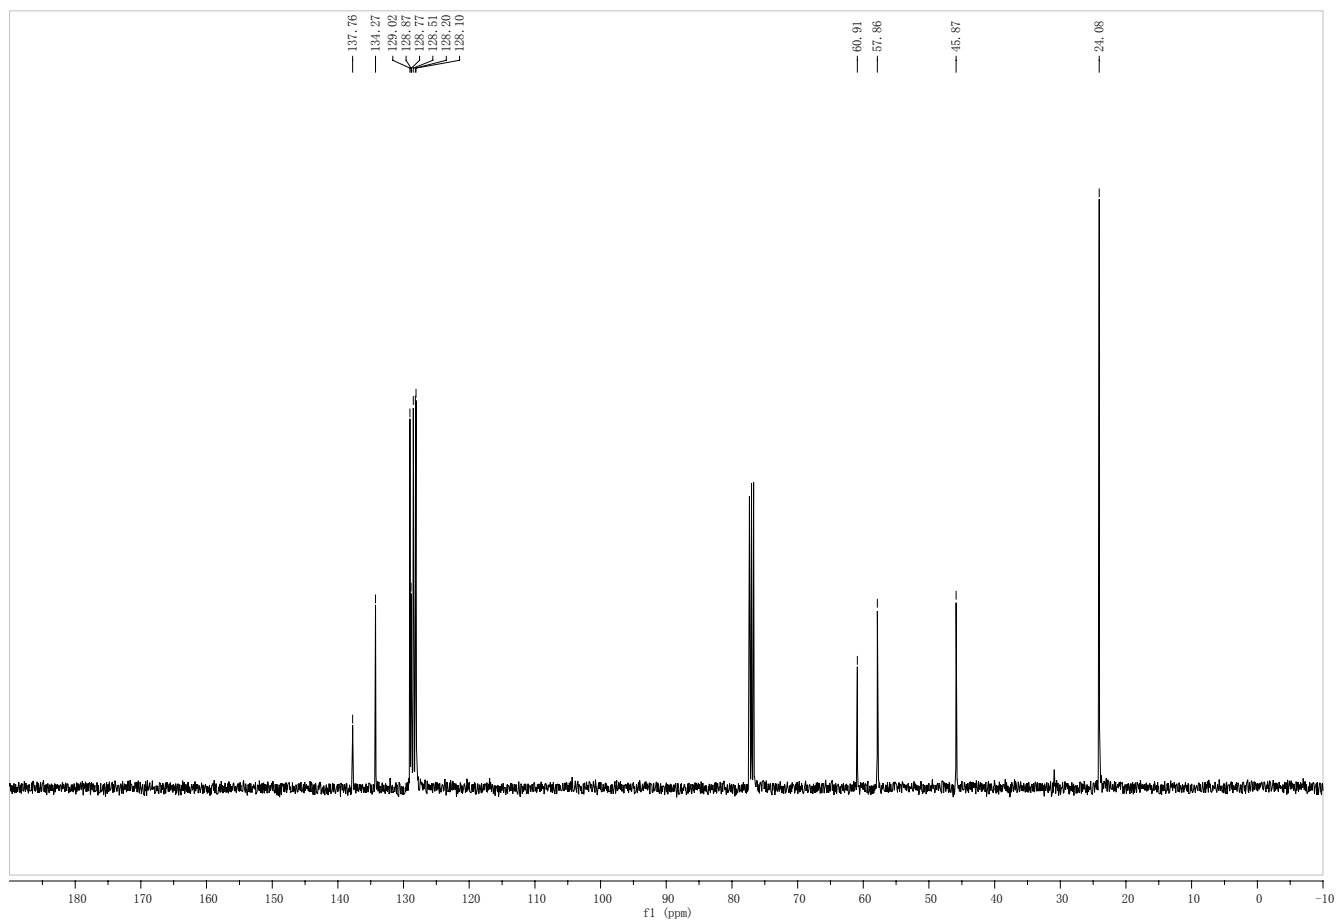

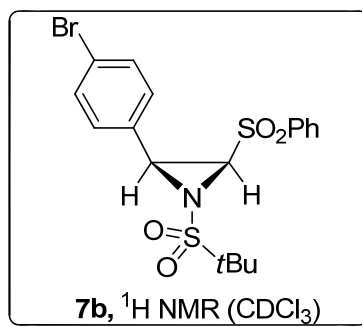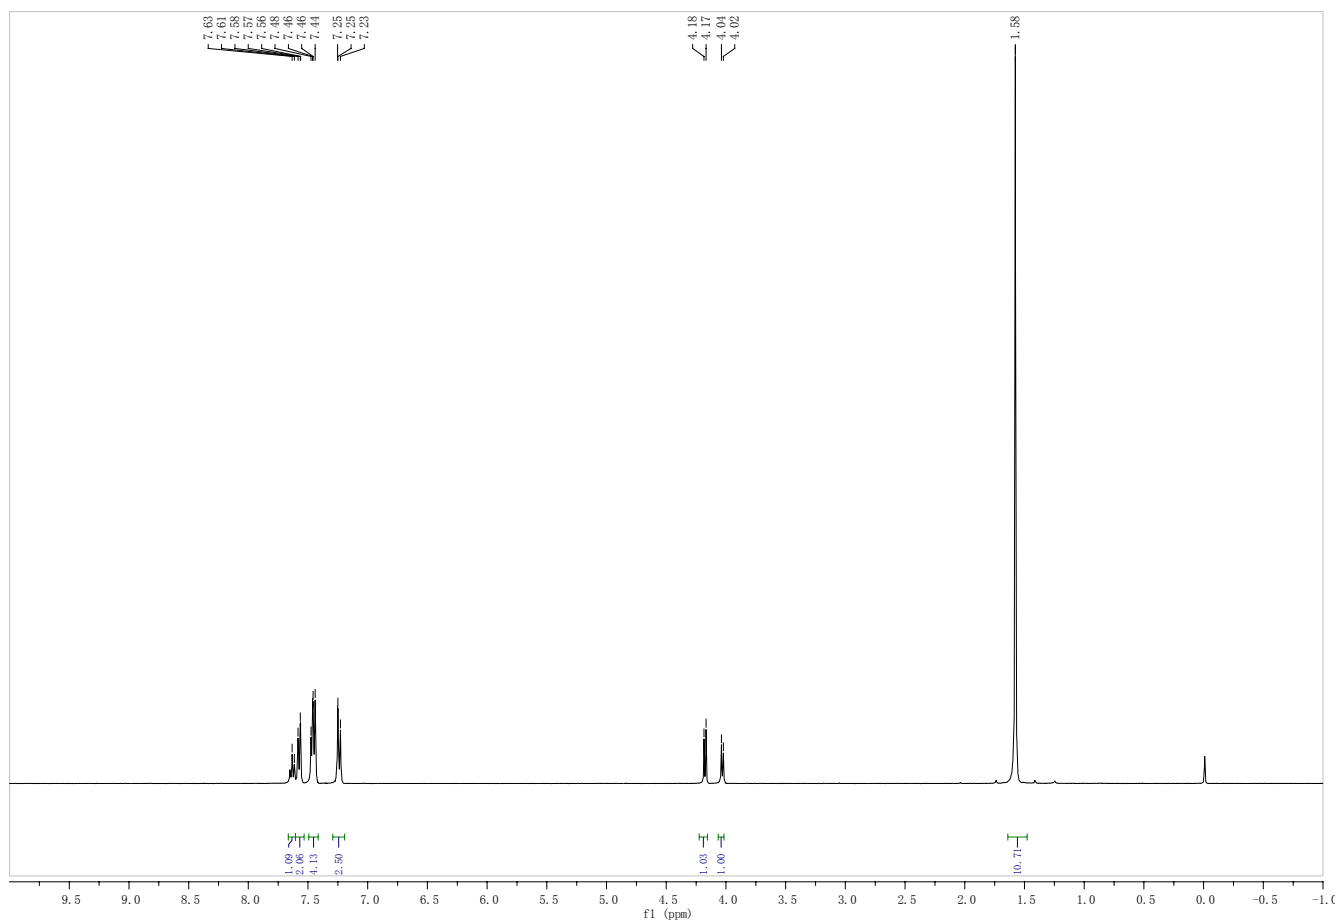

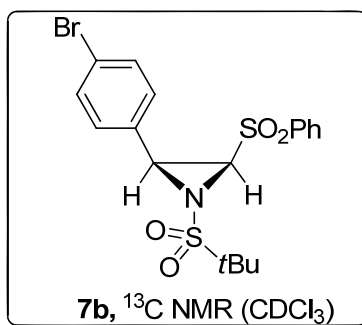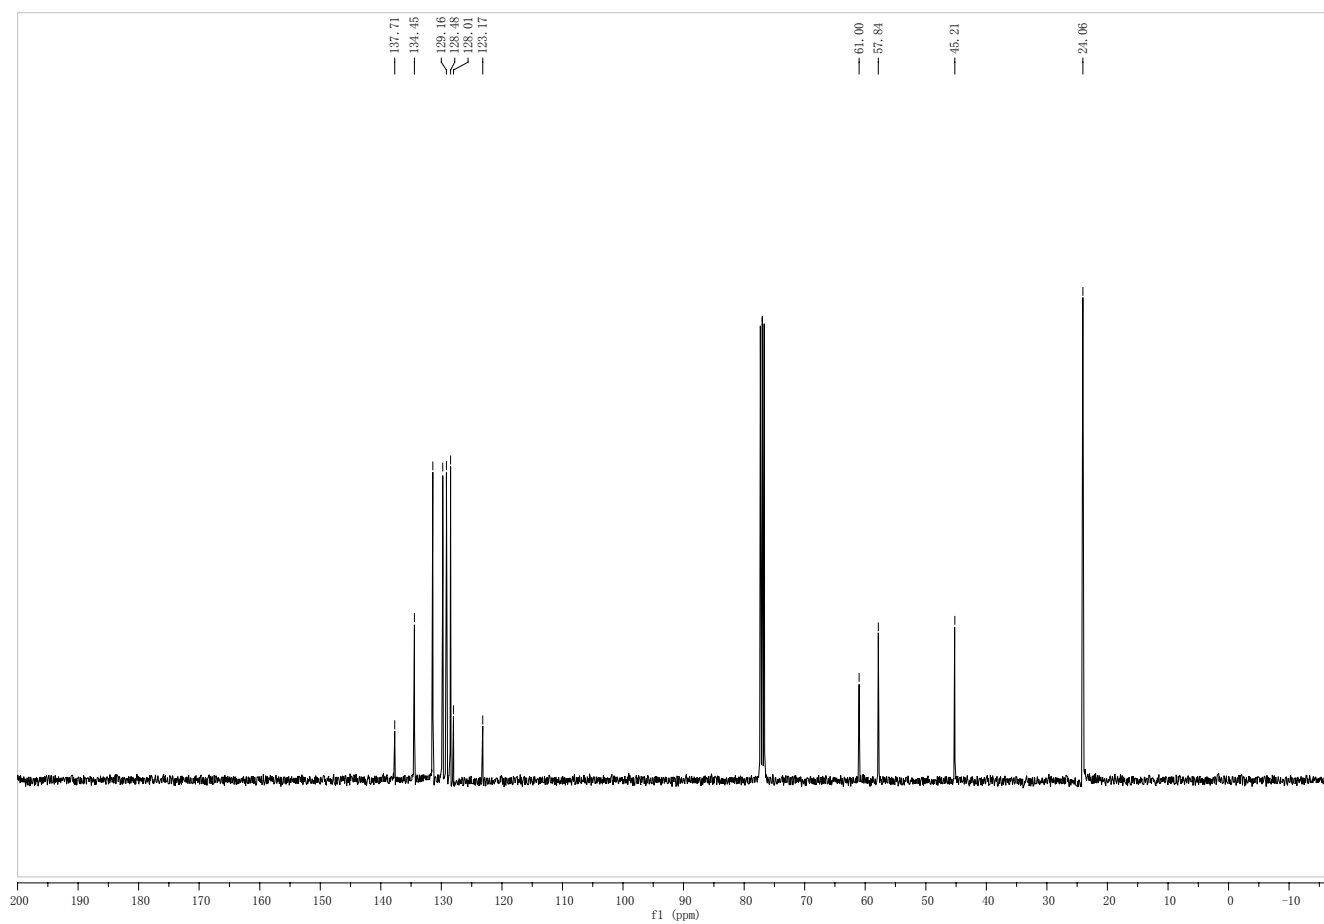

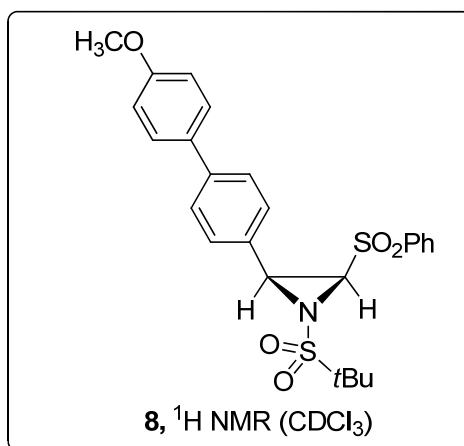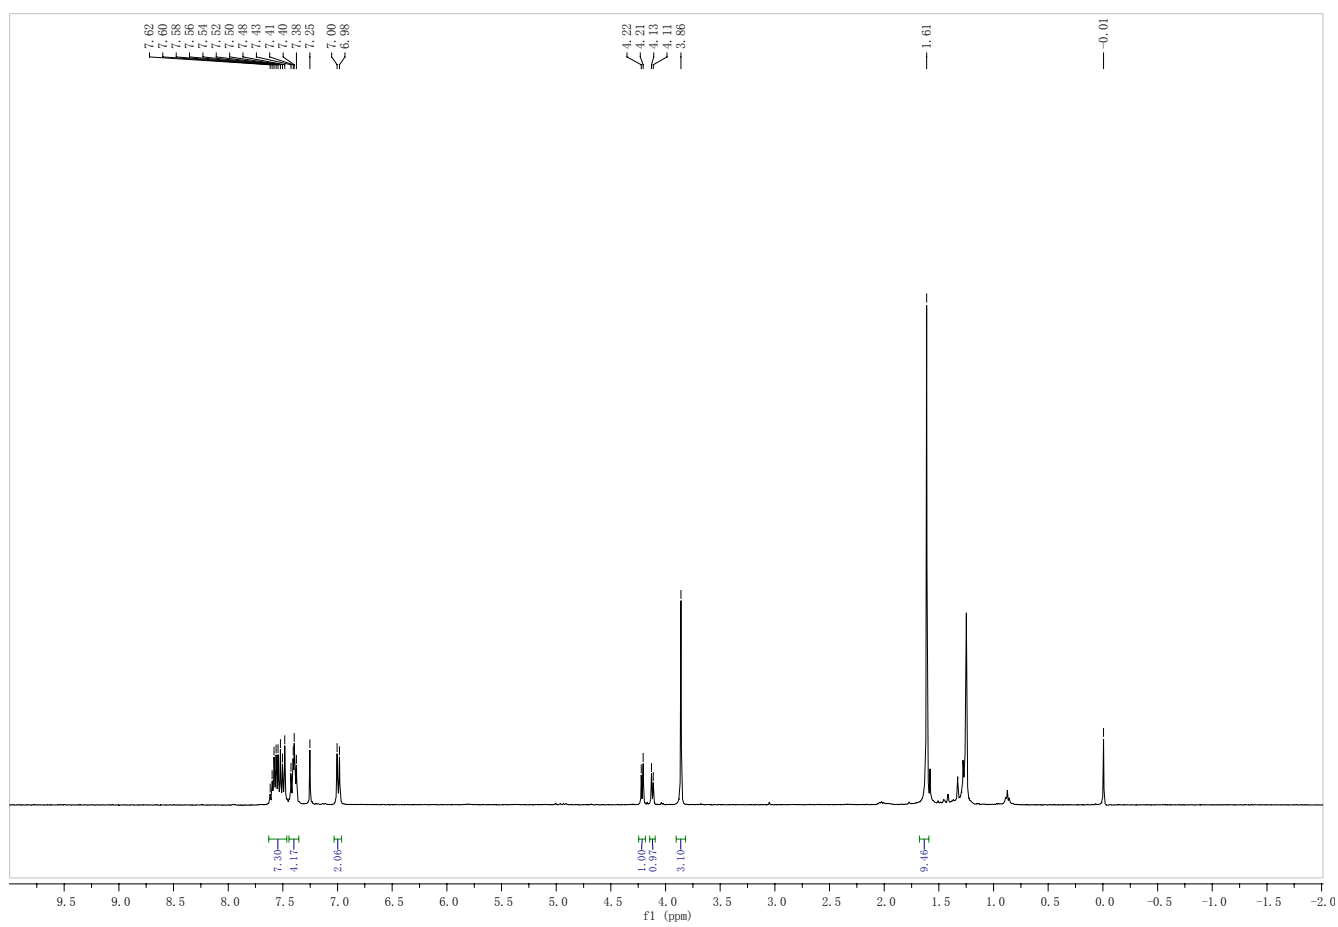



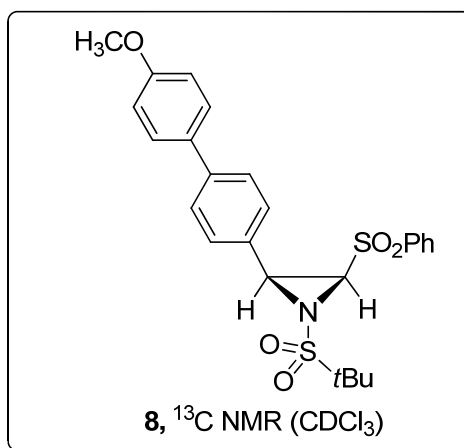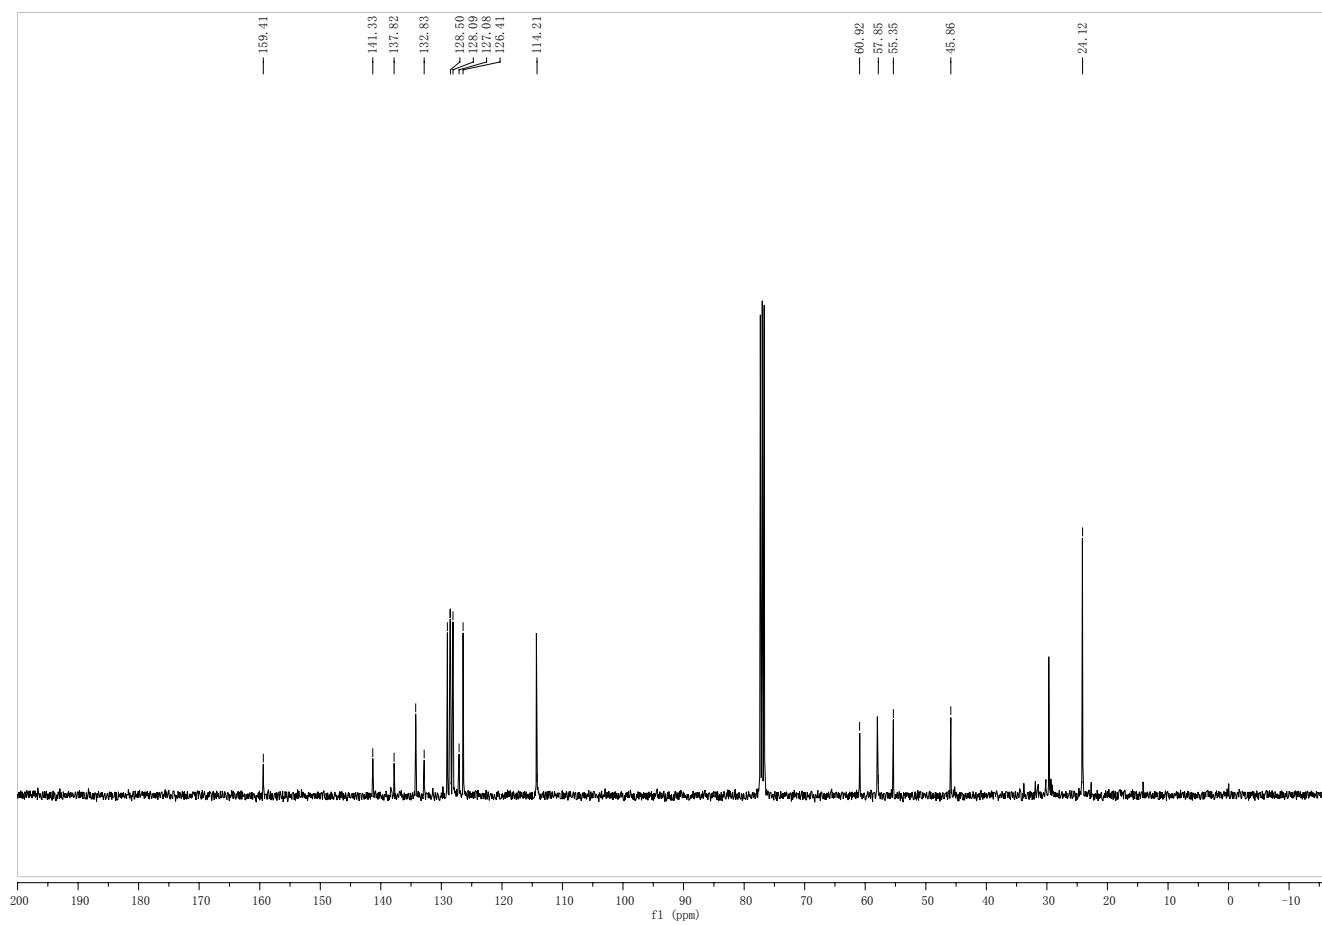

Supplement: c3ra44174a.pdf [file c3ra44174a.pdf]
